# Supplementary material for: Synthesis of pyrrolo[1,2-a]quinoxalines via an electrochemical C(sp3)–H functionalization
Source: Royal Society of Chemistry journal article supplement (doi:10.1039/d4qo01981d), 2024-12-17

# Supporting Information

## Synthesis of pyrrolo[1,2-*a*]quinoxalines via electrochemical C(sp<sup>3</sup>)-H functionalization

Sijie Peng<sup>a</sup>, Tong Li<sup>a</sup>, Kai Li<sup>a</sup>, Qi Sun<sup>\*b</sup> and Zhiyong Wang<sup>\*a,b</sup>

\*Hefei National Center for Physical Sciences at Microscale, Key Laboratory of Precision and Intelligent Chemistry, School of Chemistry and Materials Science, University of Science and Technology of China, Hefei 230026, China.

\*E-mail: [zwang3@ustc.edu.cn](mailto:zwang3@ustc.edu.cn)

\*Institute of Advanced Technology, University of Science and Technology of China, Hefei 230000, China.

\*Email: [sunqi924@ustc.edu.cn](mailto:sunqi924@ustc.edu.cn)

### Table of Contents

|                                          |     |
|------------------------------------------|-----|
| General Information .....                | S2  |
| Experimental Procedure .....             | S2  |
| Optimization of Reaction Conditions..... | S7  |
| Cyclic Voltammetry Data .....            | S8  |
| Detail Descriptions for Products .....   | S10 |
| References .....                         | S18 |
| Copies of Product NMR Spectra .....      | S18 |

## General Information

Unless otherwise noted, materials were obtained from commercial suppliers and used without further purification. NMR spectra were recorded on a Bruker AV-500 ( $^1\text{H}$ : 500 MHz,  $^{13}\text{C}$ : 125 MHz,  $^{19}\text{F}$ : 470 MHz) spectrometer using TMS as internal reference. Chemical shifts ( $\delta$ ) and coupling constants ( $J$ ) were expressed in ppm and Hz, respectively. The following calibration was used:  $\text{CDCl}_3$   $\delta$  = 7.26 and 77.16 ppm, THF  $\delta$  = 1.72, 3.58 ppm and 67.21, 25.31 ppm. GCMS was Shimadzu QP-5050 GC-MS system. Commercially available compounds were used without further purification. All substances were known compounds and synthesized according to the literature. High resolution mass spectra (HRMS) were measured using electrospray ionization (ESI) and the time-of-flight (TOF) mass analyzer. The anode electrode and cathode electrode all are Pt ( $1.0 \times 1.0 \text{ cm}^2$ ). These electrodes are commercially available from GaossUnion, China.

## Experimental Procedure

### Procedure for the preparation of 4 (2-(iodomethyl)quinoline):

2-Methylquinoline (**1a**, 0.5 mmol), cuprous halide (0.75 mmol), TBHP (8.0 eq., 70% aqueous solution) and  $\text{CH}_3\text{CN}$  (2 mL) were stirred at 70 °C for 8 h. Then, the reaction mixture was diluted by water and extracted with  $\text{CH}_2\text{Cl}_2$  ( $3 \times 15 \text{ mL}$ ). The  $\text{I}_2$  in organic phase was quenched by  $\text{Na}_2\text{S}_2\text{O}_3$ . The combined organic layers were washed with saturated  $\text{NH}_4\text{Cl}$  aqueous solution and dried over anhydrous  $\text{Na}_2\text{SO}_4$ . After filtration, the solvent was evaporated in vacuo. The desired product was obtained by silica gel chromatography (petroleum ether/ethyl acetate,  $v/v=10/1$ ).<sup>[S1]</sup>

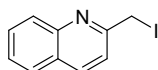

### 2-(iodomethyl)quinoline

$^1\text{H}$  NMR (500 MHz,  $\text{CDCl}_3$ )  $\delta$  8.12 (d,  $J$  = 8.5 Hz, 1H), 8.06 (d,  $J$  = 8.5 Hz, 1H), 7.79 (d,  $J$  = 8.1 Hz, 1H), 7.73-7.69 (m, 1H), 7.57-7.49 (m, 2H), 4.68 (s, 2H).

$^{13}\text{C}$  NMR (125 MHz,  $\text{CDCl}_3$ )  $\delta$  158.4, 147.5, 137.3, 130.0, 129.0, 127.5, 127.1, 126.9, 121.1, 6.8.

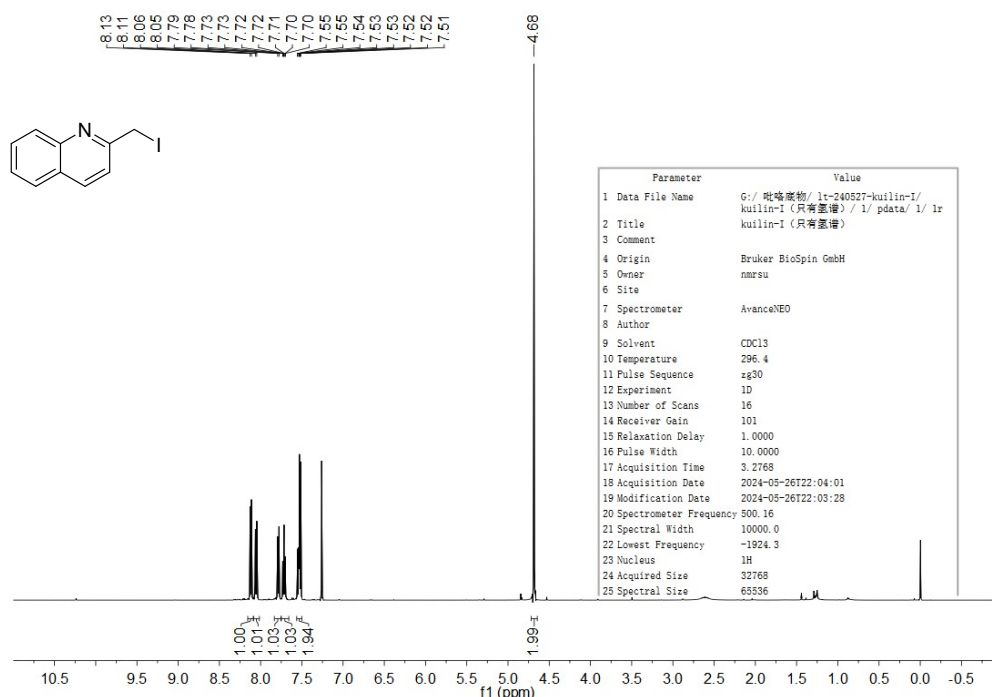

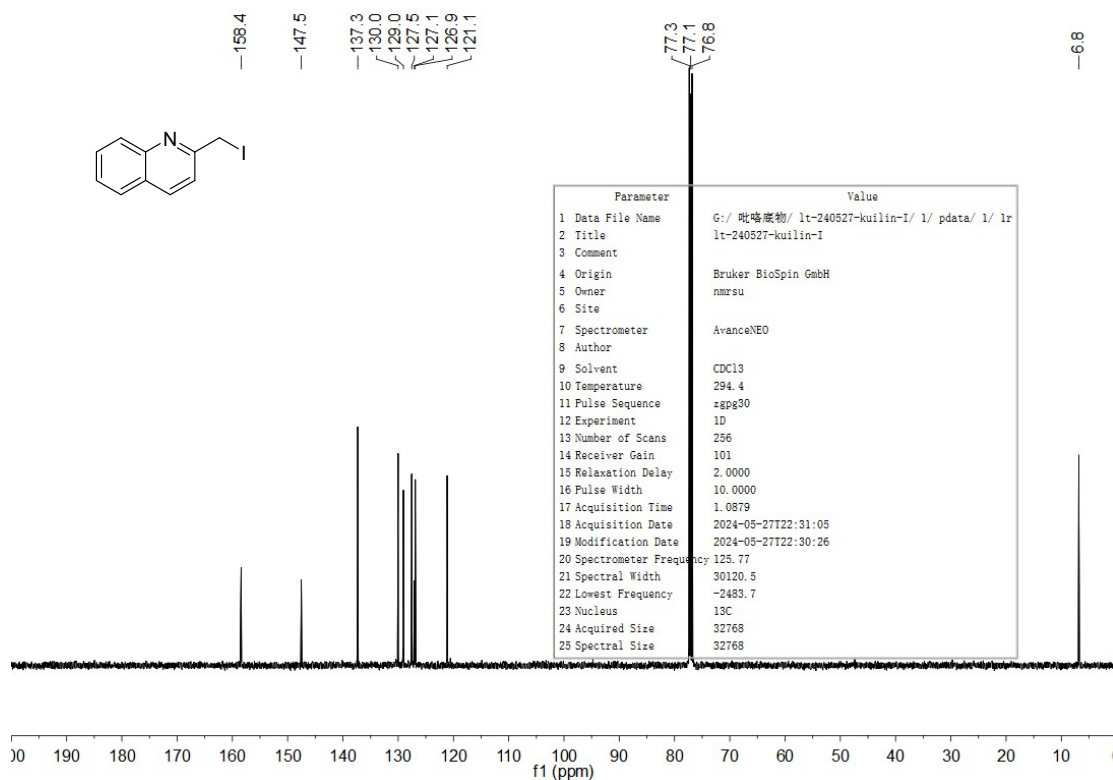

Fig S1. The NMR spectra of the prepared 2-(iodomethyl)quinoline

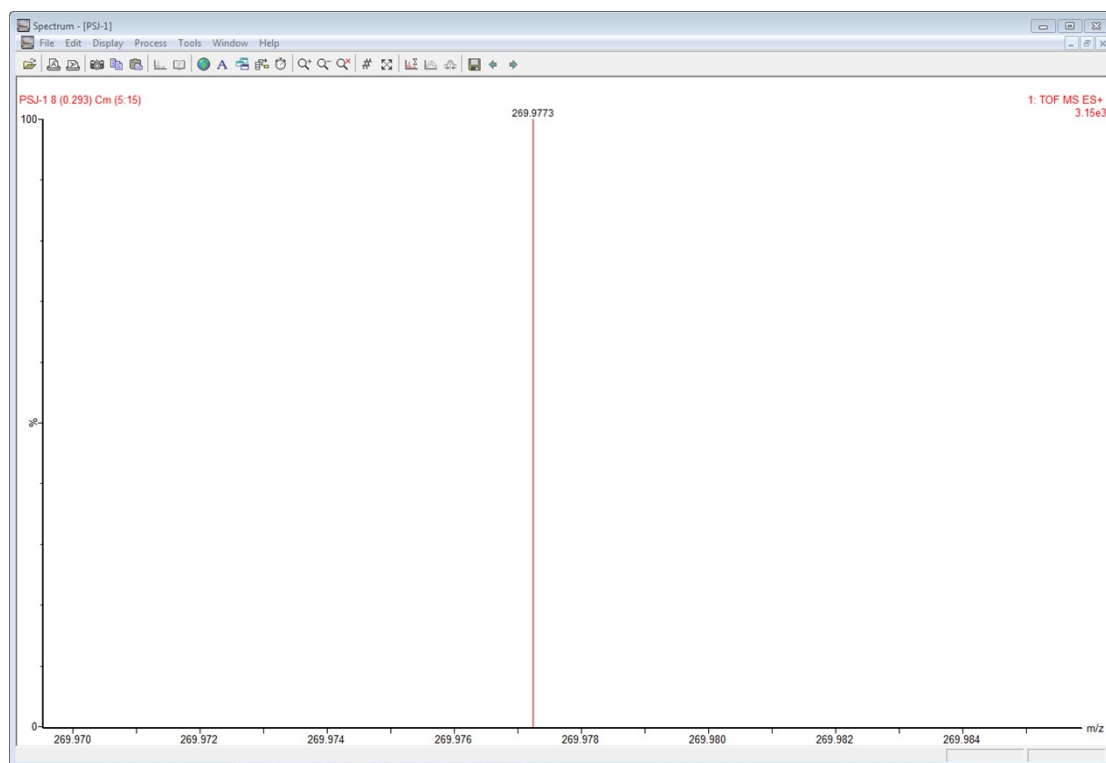

Fig. S2 The HRMS data of intermediate 4 detected during the reaction process

### Procedure for the preparation of 5 (quinoline-2-carbaldehyde):

A 25 mL pressure vial was charged with 2-methylquinoline (43.0 mg, 0.30 mmol, 1.0 equiv.), I<sub>2</sub> (7.6 mg, 0.03 mmol, 0.1 equiv.), TFA (68.4 mg, 0.6 mmol, 2.0 equiv.) and DMSO (2.0 mL). The vial was sealed and the resulting mixture was stirred at 130 °C for 30 min under an air atmosphere. After the reaction was completed (monitored by TLC), and added 50 mL water and an appropriate amount of 10% NaOH solution (w/w) to the mixture, then extracted with EtOAc 3 times (3 × 50 mL). The extract was washed with 10% Na<sub>2</sub>S<sub>2</sub>O<sub>3</sub> solution (w/w), dried over anhydrous Na<sub>2</sub>SO<sub>4</sub> and concentrated under reduced pressure. The residue was purified by flash column chromatography on silica gel to yield the corresponding product as a brown solid (30 mg, 64% yield).<sup>[S2]</sup>

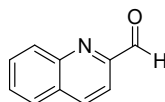

### quinoline-2-carbaldehyde

<sup>1</sup>H NMR (500 MHz, CDCl<sub>3</sub>) δ 10.23 (d, *J* = 0.6 Hz, 1H), 8.32 (d, *J* = 8.4 Hz, 1H), 8.25 (d, *J* = 8.5 Hz, 1H), 8.04 (d, *J* = 8.4 Hz, 1H), 7.91 (d, *J* = 8.2 Hz, 1H), 7.86 – 7.81 (m, 1H), 7.72 – 7.67 (m, 1H).

<sup>13</sup>C NMR (125 MHz, CDCl<sub>3</sub>) δ 193.8, 152.6, 147.9, 137.5, 130.6, 130.4, 130.1, 129.3, 127.9, 117.4.

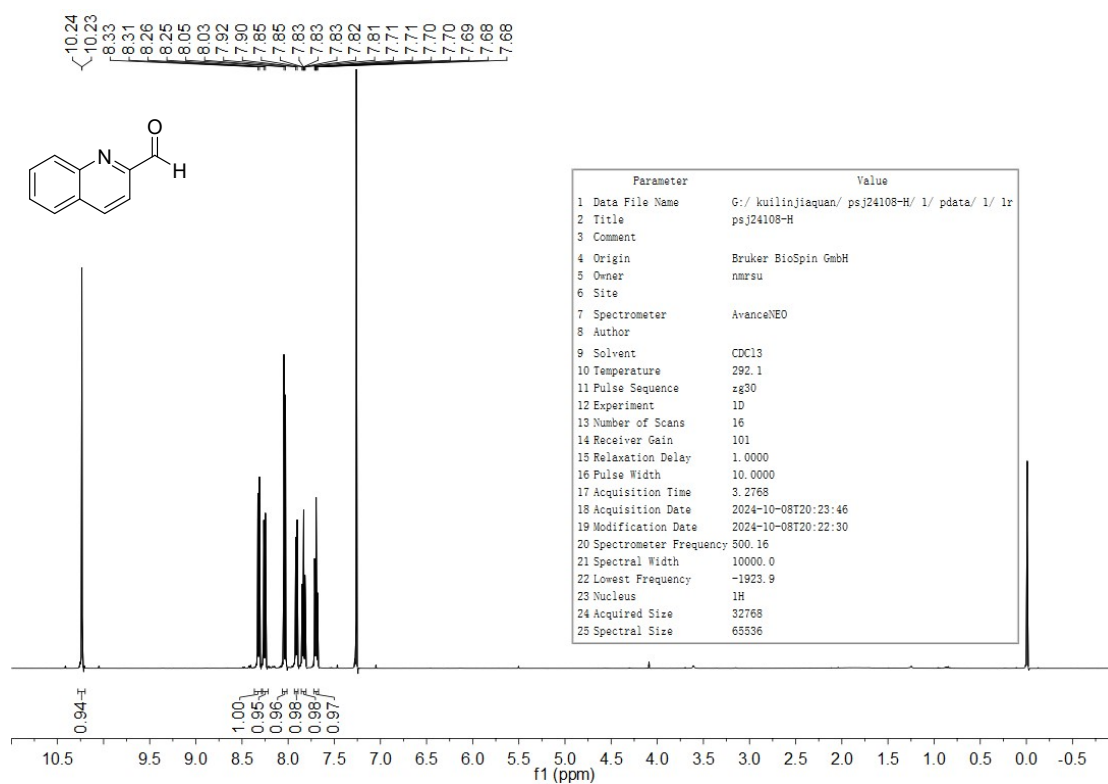

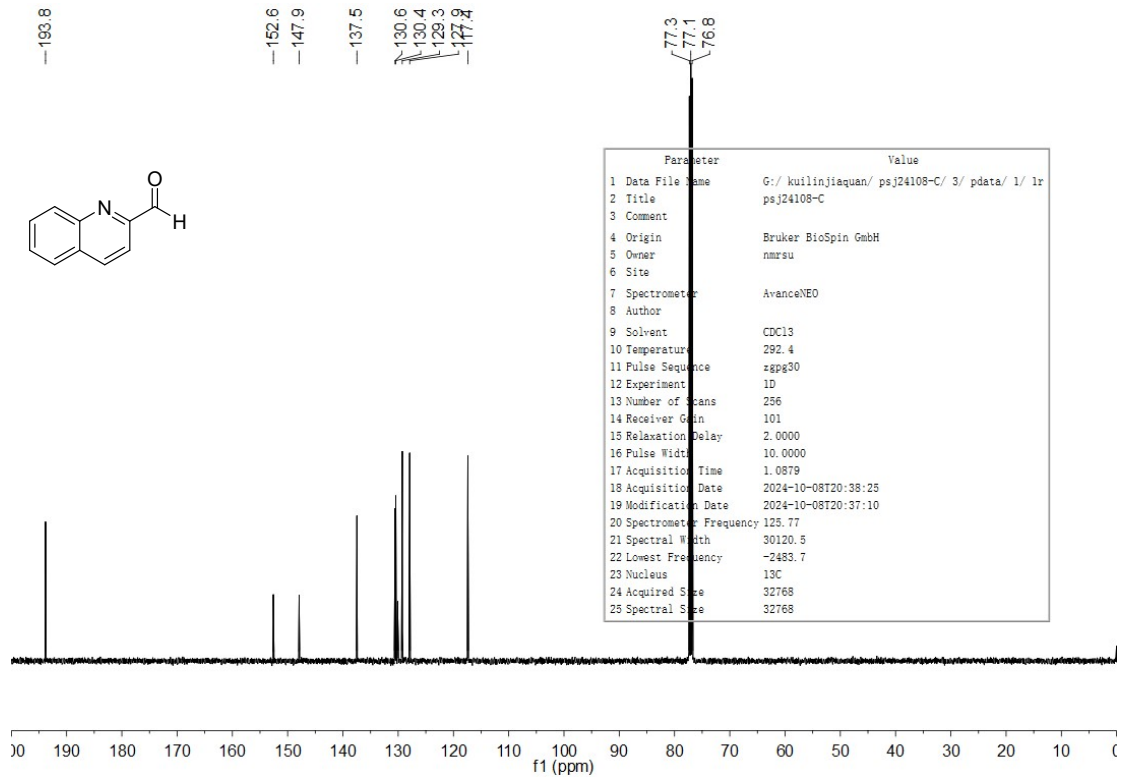

Fig. S3 The NMR spectra of the prepared quinoline-2-carbaldehyde

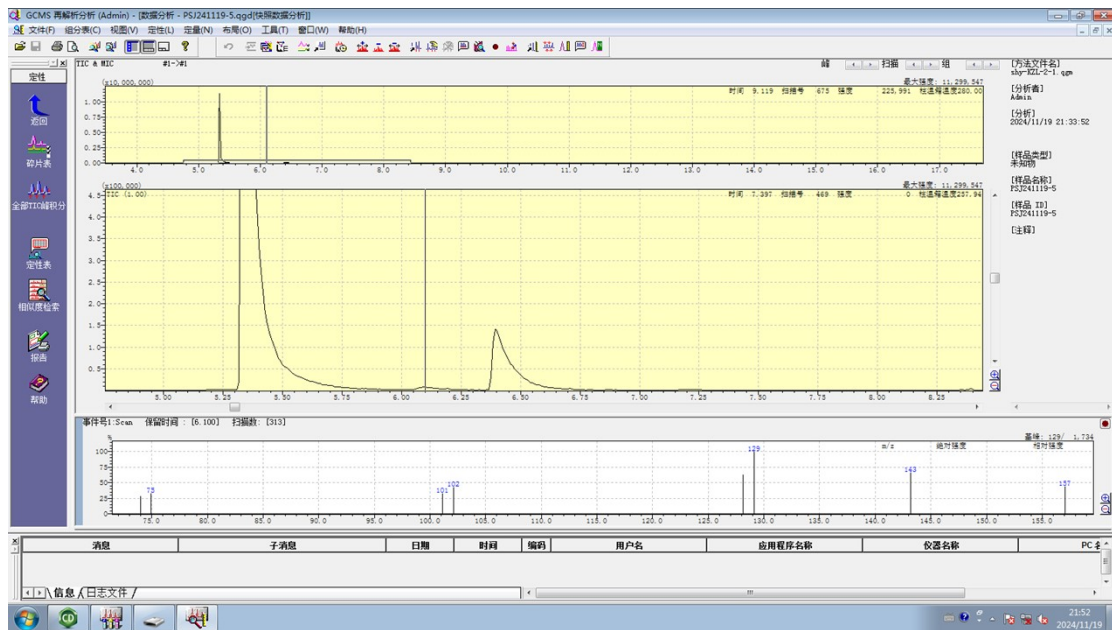

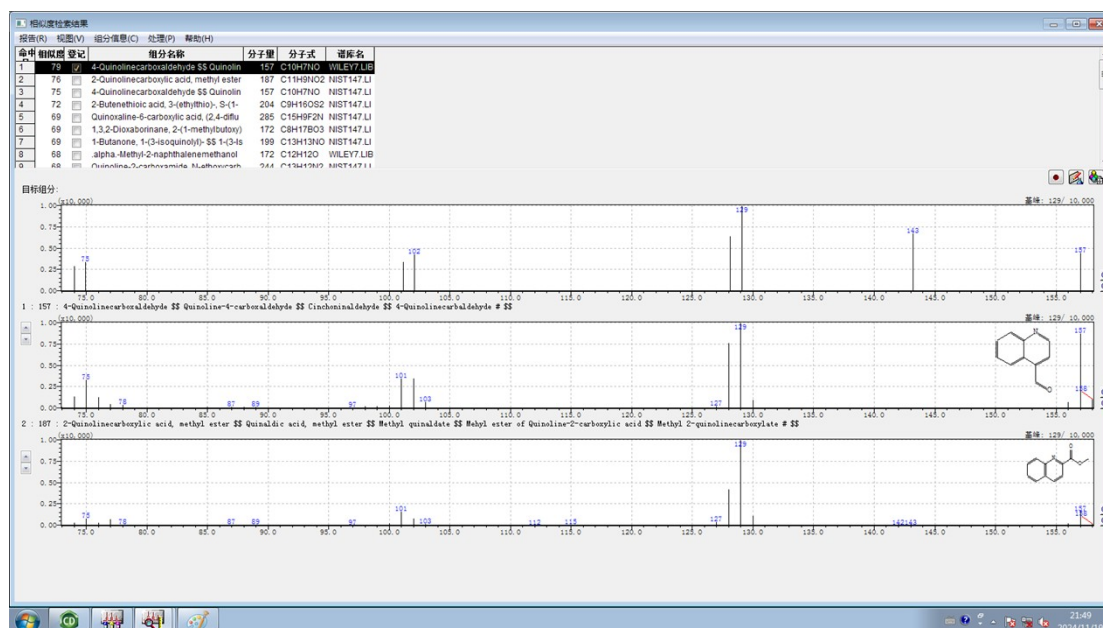

Fig. S4 The GC-MS data of intermediate **5** detected during the reaction process

### Typical Procedure for the Electrosynthesis of pyrrolo[1,2-*a*]quinoxalines N-heterocycles:

A mixture of 2-methylquinoline **1a** (0.36 mmol) and 2-(1*H*-pyrrol-1-yl)aniline **2a** (0.9 mmol), H<sub>2</sub>C<sub>2</sub>O<sub>4</sub> (0.3 mmol), NH<sub>4</sub>Cl (0.3 mmol) and NH<sub>4</sub>I (0.06 mmol) and DMSO = 3 mL was added to an undivided cell. The cell was equipped with platinum electrode as both the anode and cathode. The reaction mixture was stirred and electrolyzed at a constant current of 10 mA under 100 °C for corresponding time. When the reaction was finished, the solution was extracted with EtOAc (3×10 mL). The combined organic layer was dried with Na<sub>2</sub>SO<sub>4</sub>, filtered. The solvent was removed with a rotary evaporator. The residue was purified by column chromatography on silica gel (PE/EtOAc = 10:1) to afford the desired product.

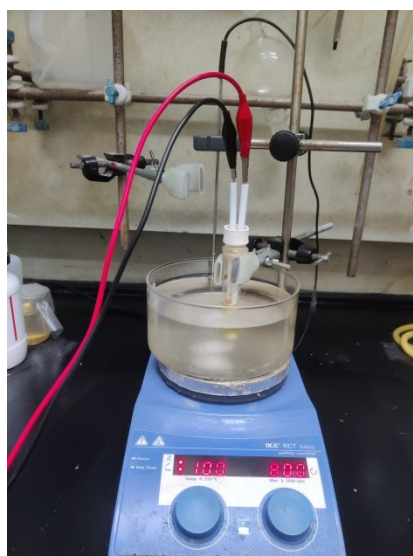

Fig. S5 The reaction setup for the electrochemical reaction

### Gram-scale synthesis of **3aa**:

A mixture of 2-methylquinoline **1a** (6 mmol), 2-(1*H*-pyrrol-1-yl)aniline **2a** (5 mmol), H<sub>2</sub>C<sub>2</sub>O<sub>4</sub> (5 mmol), NH<sub>4</sub>Cl (5 mmol) and NH<sub>4</sub>I (1 mmol) and DMSO = 50 mL was added to an undivided cell. The cell was equipped with platinum electrode as both the anode and cathode. The reaction mixture was stirred and electrolyzed ( $J = 10 \text{ mA/cm}^2$ ,  $I = 23 \text{ mA}$ ) under 100 °C for 3.5 days. When the reaction was finished, the solution was extracted with EtOAc (3×100 mL). The combined organic layer was dried with Na<sub>2</sub>SO<sub>4</sub>, filtered. The solvent was removed with a rotary evaporator. The residue was purified by column chromatography on silica gel (PE/EtOAc = 10:1) to afford the desired product.

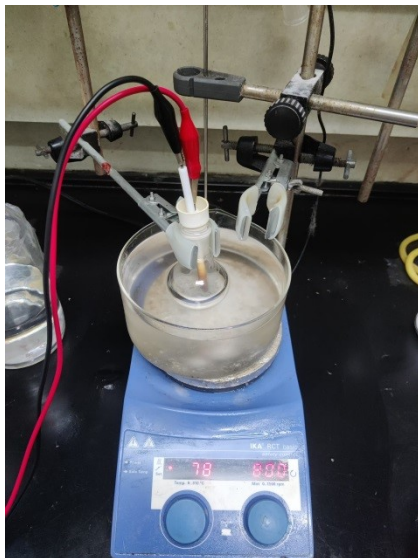

**Fig. S6** The reaction setup for the gram-scale reaction

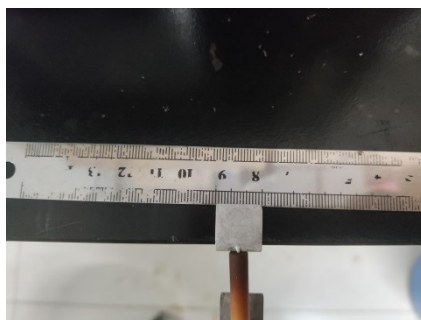

**Fig. S7** Pt electrode used in the gram-scale reaction

**Table S1. Optimization of reaction conditions**

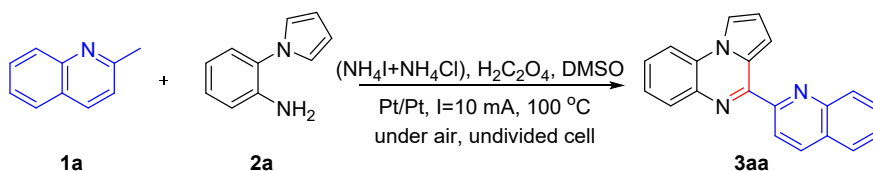

| Entry | Variations from standard conditions                                | Yield[%] |
|-------|--------------------------------------------------------------------|----------|
| 1     | None                                                               | 81       |
| 2     | DMF as the solvent                                                 | 55       |
| 3     | NMP as the solvent                                                 | Trace    |
| 4     | Bu <sub>4</sub> NI as the electrolyte instead of NH <sub>4</sub> I | 36       |

|    |                                                                                                                                      |           |
|----|--------------------------------------------------------------------------------------------------------------------------------------|-----------|
| 5  | KI as the electrolyte instead of NH <sub>4</sub> I                                                                                   | Trace     |
| 6  | a graphite plate as cathode                                                                                                          | 64        |
| 7  | a graphite plate as anode                                                                                                            | Trace     |
| 8  | 7 mA, 15 mA instead of 10 mA                                                                                                         | 60, trace |
| 9  | 90 °C, 110 °C instead of 100 °C                                                                                                      | 30, trace |
| 10 | NH <sub>4</sub> Br, (NH <sub>4</sub> ) <sub>6</sub> Mo <sub>7</sub> O <sub>24</sub> ·4H <sub>2</sub> O instead of NH <sub>4</sub> Cl | 69, 80    |
| 11 | without electricity                                                                                                                  | Trace     |

<sup>a</sup> Standard conditions 1: platinum plate (10 mm × 10 mm × 0.2 mm) as the anode, platinum plate (10 mm × 10 mm × 0.2mm) as the cathode, undivided cell, **1a** (0.36 mmol), **2a** (0.3 mmol), H<sub>2</sub>C<sub>2</sub>O<sub>4</sub> (0.3 mmol), NH<sub>4</sub>I (0.06 mmol), NH<sub>4</sub>Cl (0.3 mmol) and DMSO (3 mL), Air, 100 °C, 12 h.

<sup>b</sup> The isolated yields after column chromatography.

### Cyclic Voltammetry Data

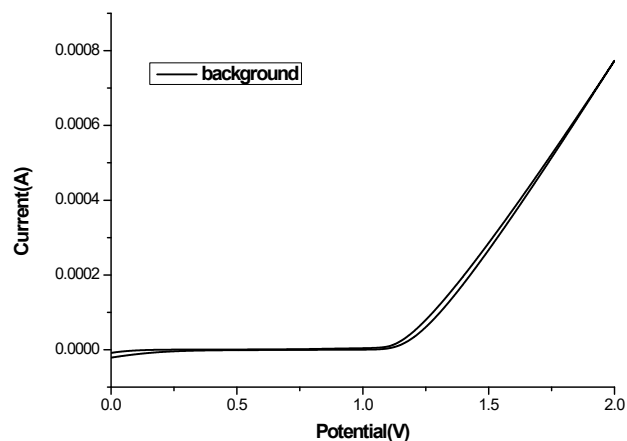

**Fig. S8** Cyclic voltammetry experiments. Cyclic voltammograms of **1a**, **2a**, NH<sub>4</sub>I and **4** in 0.1 M NH<sub>4</sub>Cl/DMSO using a Pt disk as the working electrode, and Pt wire and Ag/AgCl as the counter and reference electrodes, respectively, at a scan rate of 100 mV/s: background.

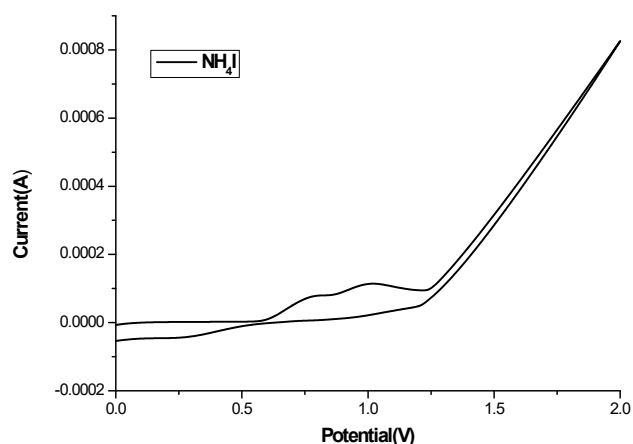

**Fig. S9** Cyclic voltammetry experiments. Cyclic voltammograms of **1a**, **2a**, NH<sub>4</sub>I and **4** in 0.1 M NH<sub>4</sub>Cl/DMSO using a Pt disk as the working electrode, and Pt wire and Ag/AgCl as the counter and reference electrodes, respectively, at a scan rate of 100 mV/s: NH<sub>4</sub>I (2 mmol/L).



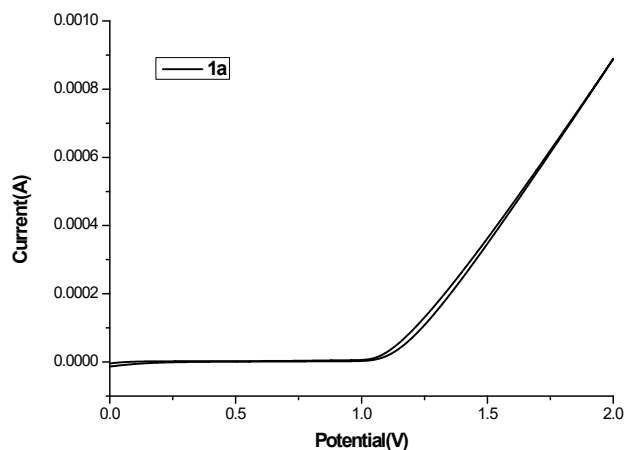

**Fig. S10** Cyclic voltammetry experiments. Cyclic voltammograms of **1a**, **2a**,  $\text{NH}_4\text{I}$  and **4** in 0.1 M  $\text{NH}_4\text{Cl}$ /DMSO using a Pt disk as the working electrode, and Pt wire and Ag/AgCl as the counter and reference electrodes, respectively, at a scan rate of 100 mV/s: **1a** (5 mmol/L).

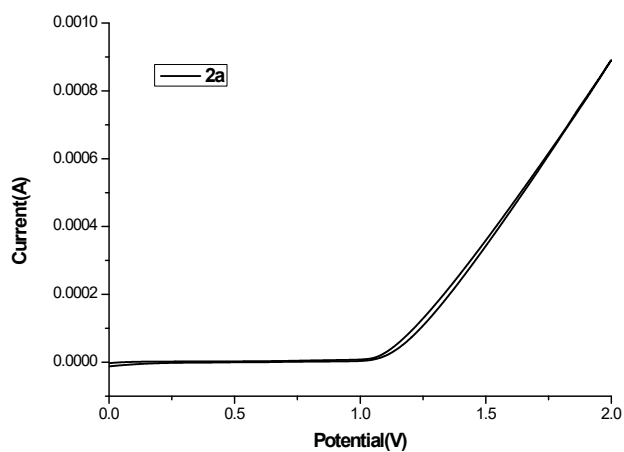

**Fig. S11** Cyclic voltammetry experiments. Cyclic voltammograms of **1a**, **2a**,  $\text{NH}_4\text{I}$  and **4** in 0.1 M  $\text{NH}_4\text{Cl}$ /DMSO using a Pt disk as the working electrode, and Pt wire and Ag/AgCl as the counter and reference electrodes, respectively, at a scan rate of 100 mV/s: **2a** (5 mmol/L).

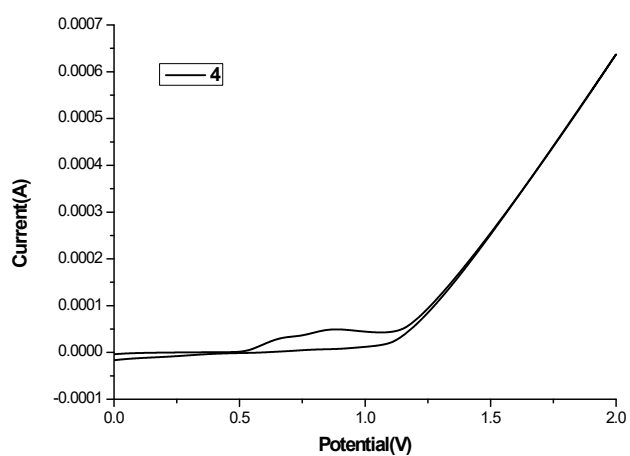

**Fig. S12** Cyclic voltammetry experiments. Cyclic voltammograms of **1a**, **2a**,  $\text{NH}_4\text{I}$  and **4** in 0.1 M  $\text{NH}_4\text{Cl}$ /DMSO using a Pt disk as the working electrode, and Pt wire and Ag/AgCl as the counter and reference electrodes,

respectively, at a scan rate of 100 mV/s: **4** (5 mmol/L).

### Detail descriptions for products

#### 4-(quinolin-2-yl)pyrrolo[1,2-*a*]quinoxaline(**3aa**)<sup>[S3]</sup>

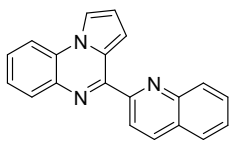

The title compound was prepared according to the general working procedure and purified by column chromatography (petroleum ether/ethyl acetate = 10:1) to give the product as a yellow solid. 81% yield, 71.8 mg.

<sup>1</sup>H NMR (500 MHz, CDCl<sub>3</sub>) δ 8.65 (d, *J* = 8.6 Hz, 1H), 8.31 (dd, *J* = 11.8, 8.6 Hz, 2H), 8.18 – 8.10 (m, 2H), 8.08 – 7.99 (m, 1H), 7.90 (dd, *J* = 7.7, 4.8 Hz, 2H), 7.83-7.76 (m, 1H), 7.61 (t, *J* = 7.5 Hz, 1H), 7.58 – 7.52 (m, 1H), 7.52-7.45 (m, 1H), 7.06 – 6.97 (m, 1H).

<sup>13</sup>C NMR (125 MHz, CDCl<sub>3</sub>) δ 156.1, 150.9, 147.6, 136.4, 135.6, 130.5, 130.1, 129.6, 128.3, 128.3, 127.8, 127.6, 127.3, 125.2, 124.7, 120.7, 114.7, 114.4, 113.7, 111.4.

#### ethyl 2-(pyrrolo[1,2-*a*]quinoxalin-4-yl)quinoline-3-carboxylate(**3ba**)

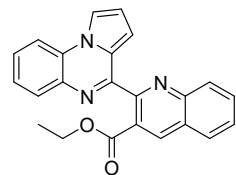

The title compound was prepared according to the general working procedure and purified by column chromatography (petroleum ether/ethyl acetate = 10:1) to give the product as a yellow solid. 65% yield, 71.6 mg. m.p. 120-122 °C.

<sup>1</sup>H NMR (500 MHz, CDCl<sub>3</sub>) δ 8.80 (s, 1H), 8.26 (d, *J* = 8.5 Hz, 1H), 7.79-8.04 (m, 3H), 7.92 (d, *J* = 8.2 Hz, 1H), 7.89 – 7.81 (m, 1H), 7.72-7.65 (m, 1H), 7.60 – 7.52 (m, 1H), 7.49 – 7.40 (m, 1H), 7.05 (dd, *J* = 3.9, 0.9 Hz, 1H), 6.92 (dd, *J* = 3.8, 2.8 Hz, 1H), 4.15 (q, *J* = 7.1 Hz, 2H), 0.92 (t, *J* = 7.1 Hz, 3H).

<sup>13</sup>C NMR (125MHz, CDCl<sub>3</sub>) δ 167.0, 154.6, 152.6, 148.1, 139.3, 135.7, 131.7, 130.3, 129.9, 128.5, 128.2, 127.6, 126.9, 126.0, 125.5, 125.3, 114.5, 113.8, 108.8, 61.5, 13.8.

HRMS (ESI) *m/z* calcd for C<sub>23</sub>H<sub>17</sub>N<sub>3</sub>O<sub>2</sub> [M+H]<sup>+</sup> 368.1394, found 368.1400.

#### 4-(5-methoxyquinolin-2-yl)pyrrolo[1,2-*a*]quinoxaline(**3ca**)

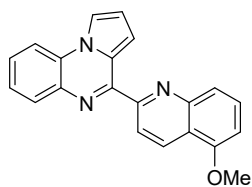

The title compound was prepared according to the general working procedure and purified by column chromatography (petroleum ether/ethyl acetate = 10:1) to give the product as a yellow solid. 78% yield, 76.1 mg. m.p. 170-172 °C.

<sup>1</sup>H NMR (500 MHz, CDCl<sub>3</sub>) δ 8.74 (d, *J* = 8.8 Hz, 1H), 8.59 (d, *J* = 8.8 Hz, 1H), 8.13 (d, *J* = 7.9 Hz, 1H), 8.07 (dd, *J* = 4.0, 1.2 Hz, 1H), 8.05 – 8.00 (m, 1H), 7.88 (dd, *J* = 16.1, 8.3 Hz, 2H), 7.67 (t, *J* = 8.1 Hz, 1H), 7.55 (t, *J* = 7.6 Hz, 1H), 7.47 (t, *J* = 7.5 Hz, 1H), 7.05 – 6.97 (m, 1H), 6.91 (d, *J* = 7.7 Hz, 1H), 4.03 (s, 3H).

<sup>13</sup>C NMR (125 MHz, CDCl<sub>3</sub>) δ 156.3, 155.2, 151.0, 148.4, 135.6, 131.4, 130.4, 129.6, 128.2, 127.8, 125.2, 124.8, 122.2, 120.8, 119.8, 114.7, 114.5, 113.8, 111.5, 105.0, 55.8.

HRMS (ESI) *m/z* calcd for C<sub>21</sub>H<sub>15</sub>N<sub>3</sub>O [M+H]<sup>+</sup> 326.1288, found 326.1294.

#### 4-(6-methylquinolin-2-yl)pyrrolo[1,2-*a*]quinoxaline(**3da**)<sup>[S3]</sup>

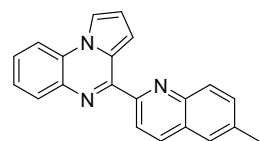

The title compound was prepared according to the general working procedure and purified by column chromatography (petroleum ether/ethyl acetate = 10:1) to give the product as a yellow solid. 71% yield, 65.8 mg.

<sup>1</sup>H NMR (500 MHz, CDCl<sub>3</sub>) δ 8.60 (d, *J* = 8.6 Hz, 1H), 8.24 (d, *J* = 8.6 Hz, 1H), 8.18 (d, *J* = 8.5 Hz, 1H), 8.14-8.07 (m, 2H), 8.04 (dd, *J* = 2.7, 1.3 Hz, 1H), 7.91 (dd, *J* = 8.2, 1.1

Hz, 1H), 7.65 (s, 1H), 7.61 (dd,  $J = 8.6, 1.9$  Hz, 1H), 7.58 – 7.52 (m, 1H), 7.48 (td,  $J = 7.7, 1.3$  Hz, 1H), 7.01 (dd,  $J = 4.0, 2.7$  Hz, 1H), 2.59 (s, 3H).

$^{13}\text{C}$  NMR (125 MHz,  $\text{CDCl}_3$ )  $\delta$  155.3, 151.1, 146.2, 137.4, 135.8, 135.6, 131.9, 130.4, 129.8, 128.4, 128.2, 127.8, 126.5, 125.2, 124.8, 120.7, 114.7, 114.4, 113.7, 111.4, 21.8.

#### 4-(6-methoxyquinolin-2-yl)pyrrolo[1,2-*a*]quinoxaline(3ea)

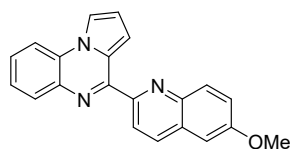

The title compound was prepared according to the general working procedure and purified by column chromatography (petroleum ether/ethyl acetate = 10:1) to give the product as a yellow solid. 65% yield, 63.4 mg. m.p. 163-165 °C.

$^1\text{H}$  NMR (500 MHz,  $\text{CDCl}_3$ )  $\delta$  8.60 (d,  $J = 8.6$  Hz, 1H), 8.22 – 8.15 (m, 2H), 8.12-8.08 (m, 2H), 8.04 – 7.98 (m, 1H), 7.88 (d,  $J = 8.1$  Hz, 1H), 7.56 – 7.49 (m, 1H), 7.49 – 7.40 (m, 2H), 7.12 (d,  $J = 2.7$  Hz, 1H), 7.00 (dd,  $J = 3.8, 2.8$  Hz, 1H), 3.95 (s, 3H).

$^{13}\text{C}$  NMR (125 MHz,  $\text{CDCl}_3$ )  $\delta$  158.5, 153.8, 151.0, 143.6, 135.7, 135.1, 131.6, 130.3, 129.5, 128.0, 127.7, 125.1, 124.7, 122.4, 121.0, 114.6, 114.3, 113.7, 111.4, 105.1, 55.6.

HRMS (ESI)  $m/z$  calcd for  $\text{C}_{21}\text{H}_{15}\text{N}_3\text{O}$   $[\text{M}+\text{H}]^+$  326.1288, found 326.1295.

#### 4-(7-methoxyquinolin-2-yl)pyrrolo[1,2-*a*]quinoxaline(3fa)

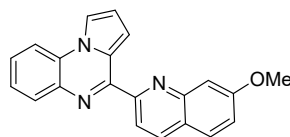

The title compound was prepared according to the general working procedure and purified by column chromatography (petroleum ether/ethyl acetate = 10:1) to give the product as a yellow solid. 66% yield, 64.4 mg. m.p. 157-159 °C.

$^1\text{H}$  NMR (500 MHz,  $\text{CDCl}_3$ )  $\delta$  8.43 (d,  $J = 8.4$  Hz, 1H), 8.23 (d,  $J = 8.4$  Hz, 1H), 8.10 (dd,  $J = 8.0, 1.3$  Hz, 1H), 8.01 (ddd,  $J = 5.3, 3.3, 1.2$  Hz, 2H), 7.89 (dd,  $J = 8.2, 1.0$  Hz, 1H), 7.75 (d,  $J = 8.9$  Hz, 1H), 7.58 (d,  $J = 2.4$  Hz, 1H), 7.57 – 7.50 (m, 1H), 7.50 – 7.43 (m, 1H), 7.25 (dd,  $J = 5.3, 3.6$  Hz, 1H), 7.00 (dd,  $J = 3.9, 2.7$  Hz, 1H), 4.01 (s, 3H).

$^{13}\text{C}$  NMR (125 MHz,  $\text{CDCl}_3$ )  $\delta$  160.9, 156.3, 151.3, 149.3, 136.2, 135.7, 130.5, 128.6, 128.2, 127.7, 125.2, 124.8, 123.6, 120.6, 118.7, 114.6, 114.4, 113.7, 111.1, 107.9, 55.7.

HRMS (ESI)  $m/z$  calcd for  $\text{C}_{21}\text{H}_{15}\text{N}_3\text{O}$   $[\text{M}+\text{H}]^+$  326.1288, found 326.1287.

#### 4-(8-methylquinolin-2-yl)pyrrolo[1,2-*a*]quinoxaline(3ga)

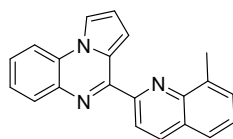

The title compound was prepared according to the general working procedure and purified by column chromatography (petroleum ether/ethyl acetate = 10:1) to give the product as a yellow solid. 78% yield, 72.3 mg. m.p. 160-162 °C.

$^1\text{H}$  NMR (500 MHz,  $\text{CDCl}_3$ )  $\delta$  8.77 (d,  $J = 8.6$  Hz, 1H), 8.31 – 8.28 (m, 2H), 8.13 (dd,  $J = 8.0, 1.1$  Hz, 1H), 8.05 (dd,  $J = 2.6, 1.3$  Hz, 1H), 7.92 (dd,  $J = 8.2, 1.0$  Hz, 1H), 7.74 (d,  $J = 8.1$  Hz, 1H), 7.64 (d,  $J = 6.9$  Hz, 1H), 7.59 – 7.53 (m, 1H), 7.50-7.46 (m, 2H), 7.04 (dd,  $J = 3.9, 2.7$  Hz, 1H), 3.01 (s, 3H).

$^{13}\text{C}$  NMR (125 MHz,  $\text{CDCl}_3$ )  $\delta$  154.80, 150.80, 146.79, 138.05, 136.58, 135.52, 130.41, 129.75, 128.39, 128.25, 127.79, 127.13, 125.65, 125.16, 124.68, 120.28, 114.68, 114.33, 113.70, 111.66, 18.84.

HRMS (ESI)  $m/z$  calcd for  $\text{C}_{21}\text{H}_{15}\text{N}_3$   $[\text{M}+\text{H}]^+$  310.1339, found 310.1345.

#### 4-(8-methoxyquinolin-2-yl)pyrrolo[1,2-*a*]quinoxaline(3ha)

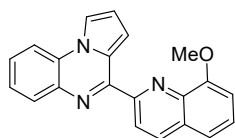

The title compound was prepared according to the general working procedure and purified by column chromatography (petroleum ether/ethyl acetate = 10:1) to give the product as a yellow solid. 70% yield, 68.3 mg. m.p. 178-180 °C.

**<sup>1</sup>H NMR** (500 MHz, CDCl<sub>3</sub>) δ 8.74 (d, *J* = 8.6 Hz, 1H), 8.37 (dd, *J* = 4.0, 1.2 Hz, 1H), 8.29 (d, *J* = 8.6 Hz, 1H), 8.12 (d, *J* = 7.9 Hz, 1H), 8.03 (dd, *J* = 2.6, 1.3 Hz, 1H), 7.90 (dd, *J* = 8.2, 0.9 Hz, 1H), 7.54-7.50 (m, 2H), 7.47-7.43 (m, 2H), 7.10 (d, *J* = 7.6 Hz, 1H), 7.04 (dd, *J* = 3.9, 2.7 Hz, 1H), 4.16 (s, 3H).

**<sup>13</sup>C NMR** (125 MHz, CDCl<sub>3</sub>) δ 156.2, 154.6, 150.8, 139.5, 136.3, 135.6, 130.4, 129.5, 128.2, 127.9, 127.7, 125.1, 124.9, 120.9, 119.3, 115.0, 114.3, 113.7, 111.9, 107.8, 56.2.

HRMS (ESI) *m/z* calcd for C<sub>21</sub>H<sub>15</sub>N<sub>3</sub>O [M+H]<sup>+</sup> 326.1288, found 326.1294.

#### 4-(5-bromoquinolin-2-yl)pyrrolo[1,2-*a*]quinoxaline(3ia)

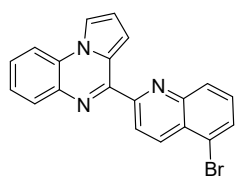

The title compound was prepared according to the general working procedure and purified by column chromatography (petroleum ether/ethyl acetate = 10:1) to give the product as a yellow solid. 88% yield, 98.7 mg. m.p. 185-187 °C.

**<sup>1</sup>H NMR** (500 MHz, CDCl<sub>3</sub>) δ 8.75 (d, *J* = 8.8 Hz, 1H), 8.65 (d, *J* = 8.9 Hz, 1H), 8.24 (d, *J* = 8.4 Hz, 1H), 8.13-8.08 (m, 2H), 8.03 (d, *J* = 1.2 Hz, 1H), 7.88 (dd, *J* = 15.1, 7.5 Hz, 2H), 7.66 – 7.58 (m, 1H), 7.58 – 7.52 (m, 1H), 7.52 – 7.43 (m, 1H), 7.01 (dd, *J* = 3.9, 2.8 Hz, 1H).

**<sup>13</sup>C NMR** (125 MHz, CDCl<sub>3</sub>) δ 156.6, 150.0, 148.3, 135.8, 135.4, 131.0, 130.5, 130.0, 129.8, 128.5, 127.7, 127.7, 125.3, 124.6, 121.9, 121.8, 114.8, 114.6, 113.7, 111.5.

HRMS (ESI) *m/z* calcd for C<sub>20</sub>H<sub>12</sub>BrN<sub>3</sub> [M+H]<sup>+</sup> 374.0287, found 374.0292.

#### 4-(5-chloroquinolin-2-yl)pyrrolo[1,2-*a*]quinoxaline(3ja)

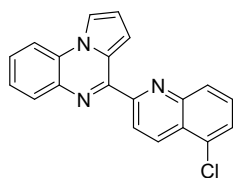

The title compound was prepared according to the general working procedure and purified by column chromatography (petroleum ether/ethyl acetate = 10:1) to give the product as a yellow solid. 90% yield, 88.8 mg. m.p. 224-226 °C.

**<sup>1</sup>H NMR** (500 MHz, CDCl<sub>3</sub>) δ 8.71 (d, *J* = 8.6 Hz, 1H), 8.23 (dd, *J* = 13.5, 8.8 Hz, 2H), 8.16 (d, *J* = 7.9 Hz, 1H), 8.11 (dd, *J* = 4.0, 1.1 Hz, 1H), 8.09 – 8.04 (m, 1H), 7.93 (d, *J* = 7.5 Hz, 1H), 7.88 (d, *J* = 2.2 Hz, 1H), 7.72 (dd, *J* = 8.9, 2.3 Hz, 1H), 7.64 – 7.55 (m, 1H), 7.54 – 7.47 (m, 1H), 7.05-7.02 (m, 1H).

**<sup>13</sup>C NMR** (125 MHz, CDCl<sub>3</sub>) δ 156.1, 150.3, 145.9, 135.5, 135.2, 133.2, 131.7, 130.6, 130.3, 128.9, 128.5, 127.7, 126.4, 125.3, 124.5, 121.6, 114.9, 114.8, 113.8, 111.7.

HRMS (ESI) *m/z* calcd for C<sub>20</sub>H<sub>12</sub>ClN<sub>3</sub> [M+H]<sup>+</sup> 330.0793, found 330.0801.

#### 4-(6-fluoroquinolin-2-yl)pyrrolo[1,2-*a*]quinoxaline(3ka)<sup>[SS]</sup>

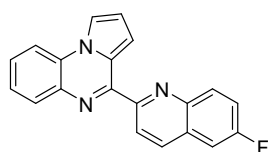

The title compound was prepared according to the general working procedure and purified by column chromatography (petroleum ether/ethyl acetate = 10:1) to give the product as a yellow solid. 80% yield, 75.1 mg.

**<sup>1</sup>H NMR** (500 MHz, CDCl<sub>3</sub>) δ 8.67 (d, *J* = 8.7 Hz, 1H), 8.32 – 8.21 (m, 2H), 8.13 – 8.06 (m, 2H), 8.06 – 8.00 (m, 1H), 7.91 (d, *J* = 8.2 Hz, 1H), 7.61 – 7.51 (m, 2H), 7.51 – 7.44 (m, 2H), 7.03-7.00 (m, 1H).

**<sup>13</sup>C NMR** (125 MHz, CDCl<sub>3</sub>) δ 161.0 (d, *J* = 249.6 Hz), 155.5 (d, *J* = 2.1 Hz), 150.5, 144.6, 135.8 (d, *J* = 5.4 Hz), 135.5, 132.6 (d, *J* = 9.3 Hz), 130.4, 129.0 (d, *J* = 10.2 Hz), 128.4, 127.7, 125.3, 124.6, 121.4,

119.9 (d,  $J = 25.7$  Hz), 114.7, 114.5, 113.8, 111.3, 110.8 (d,  $J = 21.8$  Hz).

$^{19}\text{F}$  NMR (470 MHz,  $\text{CDCl}_3$ )  $\delta$  -112.00.

#### 4-(6-chloroquinolin-2-yl)pyrrolo[1,2-*a*]quinoxaline(3la)

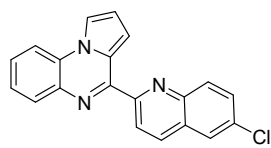

The title compound was prepared according to the general working procedure and purified by column chromatography (petroleum ether/ethyl acetate = 10:1) to give the product as a yellow solid. 84% yield, 82.9 mg. m.p. 227-229 °C.

$^1\text{H}$  NMR (500 MHz,  $\text{CDCl}_3$ )  $\delta$  8.71 (d,  $J = 8.5$  Hz, 1H), 8.23 (dd,  $J = 12.8, 9.0$  Hz, 2H), 8.15 (d,  $J = 7.7$  Hz, 1H), 8.11 (d,  $J = 3.0$  Hz, 1H), 8.06 (s, 1H), 7.93 (d,  $J = 8.1$  Hz, 1H), 7.88 (s, 1H), 7.71 (d,  $J = 8.6$  Hz, 1H), 7.58 (t,  $J = 7.5$  Hz, 1H), 7.50 (t,  $J = 7.5$  Hz, 1H), 7.03 (s, 1H).

$^{13}\text{C}$  NMR (125 MHz,  $\text{CDCl}_3$ )  $\delta$  156.2, 150.3, 145.9, 135.5, 135.2, 133.2, 131.7, 130.6, 130.3, 128.9, 128.5, 127.7, 126.4, 125.3, 124.5, 121.6, 114.9, 114.8, 113.8, 111.7.

HRMS (ESI)  $m/z$  calcd for  $\text{C}_{20}\text{H}_{12}\text{ClN}_3$   $[\text{M}+\text{H}]^+$  330.0793, found 330.0800.

#### 4-(6-bromoquinolin-2-yl)pyrrolo[1,2-*a*]quinoxaline(3ma)

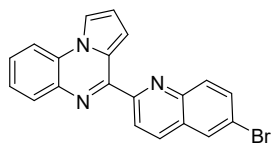

The title compound was prepared according to the general working procedure and purified by column chromatography (petroleum ether/ethyl acetate = 10:1) to give the product as a yellow solid. 84% yield, 94.2 mg. m.p. 226-228 °C.

$^1\text{H}$  NMR (500 MHz,  $\text{CDCl}_3$ )  $\delta$  8.74 – 8.62 (m, 1H), 8.25 – 8.18 (m, 1H), 8.13 (d,  $J = 8.9$  Hz, 2H), 8.10 (dd,  $J = 3.9, 1.2$  Hz, 1H), 8.06 – 8.03 (m, 2H), 7.94 – 7.88 (m, 1H), 7.88 – 7.79 (m, 1H), 7.63 – 7.54 (m, 1H), 7.52 – 7.43 (m, 1H), 7.02 (dd,  $J = 3.9, 2.7$  Hz, 1H).

$^{13}\text{C}$  NMR (125 MHz,  $\text{CDCl}_3$ )  $\delta$  156.2, 150.2, 146.1, 135.4, 135.3, 133.1, 131.7, 130.3, 129.7, 129.4, 128.5, 127.7, 125.3, 124.5, 121.6, 121.4, 114.9, 114.7, 113.8, 111.7.

HRMS (ESI)  $m/z$  calcd for  $\text{C}_{20}\text{H}_{12}\text{BrN}_3$   $[\text{M}+\text{H}]^+$  374.0287, found 374.0296.

#### 4-(6-(trifluoromethyl)quinolin-2-yl)pyrrolo[1,2-*a*]quinoxaline(3na)

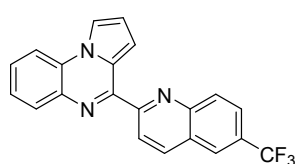

The title compound was prepared according to the general working procedure and purified by column chromatography (petroleum ether/ethyl acetate = 10:1) to give the product as a yellow solid. 95% yield, 103.5 mg. m.p. 165-167 °C.

$^1\text{H}$  NMR (500 MHz,  $\text{CDCl}_3$ )  $\delta$  8.75 (d,  $J = 8.6$  Hz, 1H), 8.35 (dd,  $J = 8.6, 3.9$  Hz, 2H), 8.16 (s, 1H), 8.11 (dd,  $J = 4.0, 1.1$  Hz, 1H), 8.08 (dd,  $J = 8.0, 1.1$  Hz, 1H), 8.04 – 7.99 (m, 1H), 7.92 (dd,  $J = 8.8, 1.8$  Hz, 1H), 7.88 (d,  $J = 8.2$  Hz, 1H), 7.59 – 7.52 (m, 1H), 7.50 – 7.44 (m, 1H), 7.01 (dd,  $J = 3.9, 2.8$  Hz, 1H).

$^{13}\text{C}$  NMR (125 MHz,  $\text{CDCl}_3$ )  $\delta$  158.1, 149.9, 148.5, 137.0, 135.4, 131.2, 130.5, 128.9 (q,  $J = 32.7$  Hz), 128.6, 127.8, 127.2, 125.6 (q,  $J = 4.4$  Hz), 125.3, 125.2 (q,  $J = 2.9$  Hz), 124.5, 124.0 (q,  $J = 272.4$  Hz), 121.8, 114.8, 114.5, 113.7, 111.4.

$^{19}\text{F}$  NMR (470 MHz,  $\text{CDCl}_3$ )  $\delta$  -62.11.

HRMS (ESI)  $m/z$  calcd for  $\text{C}_{21}\text{H}_{12}\text{F}_3\text{N}_3$   $[\text{M}+\text{H}]^+$  364.1056, found 364.1065.

#### 4-(7-fluoroquinolin-2-yl)pyrrolo[1,2-*a*]quinoxaline(3oa)<sup>[S3]</sup>

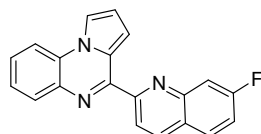

The title compound was prepared according to the general working

procedure and purified by column chromatography (petroleum ether/ethyl acetate = 10:1) to give the product as a yellow solid. 83% yield, 77.9 mg.

**<sup>1</sup>H NMR** (500 MHz, CDCl<sub>3</sub>) δ 8.58 (d, *J* = 8.6 Hz, 1H), 8.25 (d, *J* = 8.6 Hz, 1H), 8.10 – 8.04 (m, 2H), 8.02 – 7.96 (m, 1H), 7.92 – 7.81 (m, 3H), 7.56 – 7.49 (m, 1H), 7.49 – 7.41 (m, 1H), 7.36 (td, *J* = 8.6, 2.5 Hz, 1H), 6.99 (dd, *J* = 3.9, 2.8 Hz, 1H).

**<sup>13</sup>C NMR** (125 MHz, CDCl<sub>3</sub>) δ 163.2 (d, *J* = 249.9 Hz), 157.1, 150.4, 148.4 (d, *J* = 12.6 Hz), 136.2, 135.6, 130.5, 129.5 (d, *J* = 9.7 Hz), 128.4, 127.8, 125.3, 125.1, 124.6, 120.0 (d, *J* = 2.5 Hz), 117.7 (d, *J* = 25.6 Hz), 114.6, 114.4, 113.7, 113.6 (d, *J* = 20.1 Hz), 111.3.

**<sup>19</sup>F NMR** (470 MHz, CDCl<sub>3</sub>) δ -109.66.

#### 4-(7-chloroquinolin-2-yl)pyrrolo[1,2-*a*]quinoxaline(3pa)

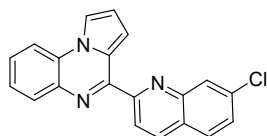

The title compound was prepared according to the general working procedure and purified by column chromatography (petroleum ether/ethyl acetate = 10:1) to give the product as a yellow solid. 90% yield, 88.8 mg. m.p. 215-217 °C.

**<sup>1</sup>H NMR** (500 MHz, CDCl<sub>3</sub>) δ 8.68 (d, *J* = 8.6 Hz, 1H), 8.34-8.27 (m, 2H), 8.15 (d, *J* = 7.9 Hz, 1H), 8.13 – 8.08 (m, 1H), 8.06 (d, *J* = 1.2 Hz, 1H), 7.93 (d, *J* = 8.1 Hz, 1H), 7.83 (d, *J* = 8.7 Hz, 1H), 7.63 – 7.54 (m, 2H), 7.50 (t, *J* = 7.2 Hz, 1H), 7.03 (dd, *J* = 3.7, 2.9 Hz, 1H).

**<sup>13</sup>C NMR** (125 MHz, CDCl<sub>3</sub>) δ 155.8, 149.2, 146.9, 135.2, 134.4, 134.2, 129.3, 128.0, 127.8, 127.5, 127.3, 126.7, 125.7, 124.3, 123.5, 119.9, 113.8, 113.7, 112.8, 110.7.

HRMS (ESI) *m/z* calcd for C<sub>20</sub>H<sub>12</sub>ClN<sub>3</sub> [M+H]<sup>+</sup> 330.0793, found 330.0802.

#### 4-(7-bromoquinolin-2-yl)pyrrolo[1,2-*a*]quinoxaline(3qa)

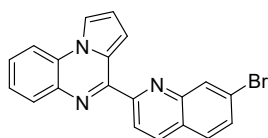

The title compound was prepared according to the general working procedure and purified by column chromatography (petroleum ether/ethyl acetate = 10:1) to give the product as a yellow solid. 83% yield, 92.8 mg. m.p. 198-200 °C.

**<sup>1</sup>H NMR** (500 MHz, CDCl<sub>3</sub>) δ 8.72 (d, *J* = 8.6 Hz, 1H), 8.48 (d, *J* = 1.9 Hz, 1H), 8.31 (d, *J* = 8.5 Hz, 1H), 8.17 (d, *J* = 7.9 Hz, 1H), 8.13 (dd, *J* = 4.0, 1.3 Hz, 1H), 8.07 (dd, *J* = 2.7, 1.3 Hz, 1H), 7.93 (dd, *J* = 8.2, 1.1 Hz, 1H), 7.77 (d, *J* = 8.6 Hz, 1H), 7.70 (dd, *J* = 8.6, 1.9 Hz, 1H), 7.62 – 7.55 (m, 1H), 7.53 – 7.47 (m, 1H), 7.04 (dd, *J* = 4.0, 2.7 Hz, 1H).

**<sup>13</sup>C NMR** (125 MHz, CDCl<sub>3</sub>) δ 156.8, 150.0, 148.2, 136.3, 134.2, 132.4, 130.9, 130.3, 128.9, 128.6, 127.7, 127.0, 125.4, 124.5, 123.7, 121.2, 115.0, 114.9, 113.8, 112.0.

HRMS (ESI) *m/z* calcd for C<sub>20</sub>H<sub>12</sub>BrN<sub>3</sub> [M+H]<sup>+</sup> 374.0287, found 374.0290.

#### 4-(8-fluoroquinolin-2-yl)pyrrolo[1,2-*a*]quinoxaline(3ra)

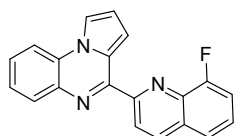

The title compound was prepared according to the general working procedure and purified by column chromatography (petroleum ether/ethyl acetate = 10:1) to give the product as a yellow solid. 84% yield, 78.9 mg. m.p. 220-222 °C.

**<sup>1</sup>H NMR** (500 MHz, CDCl<sub>3</sub>) δ 8.86 (d, *J* = 8.7 Hz, 1H), 8.43 – 8.32 (m, 2H), 8.19 (d, *J* = 7.8 Hz, 1H), 8.08 (dd, *J* = 2.6, 1.2 Hz, 1H), 7.94 (dd, *J* = 8.2, 1.0 Hz, 1H), 7.69 (d, *J* = 8.1 Hz, 1H), 7.52 (m, 4H), 7.60-7.44 (dd, *J* = 4.0, 2.7 Hz, 1H).

$^{13}\text{C}$  NMR (125 MHz, THF)  $\delta$  158.7 (d,  $J = 257.4$  Hz), 156.1, 149.2, 137.6 (d,  $J = 12.0$  Hz), 135.6 (d,  $J = 3.1$  Hz), 135.5, 130.3, 130.0 (d,  $J = 1.4$  Hz), 128.4, 128.1, 127.1 (d,  $J = 8.1$  Hz), 124.8, 124.2, 123.3, 123.2, 120.8, 114.5 (d,  $J = 39.7$  Hz), 114.0, 113.4 (d,  $J = 18.5$  Hz), 112.2.

$^{19}\text{F}$  NMR (470 MHz,  $\text{CDCl}_3$ )  $\delta$  -124.26.

HRMS (ESI)  $m/z$  calcd for  $\text{C}_{20}\text{H}_{12}\text{FN}_3$   $[\text{M}+\text{H}]^+$  314.1088, found 314.1091.

#### 8-methoxy-4-(quinolin-2-yl)pyrrolo[1,2-*a*]quinoxaline(3ab)<sup>[S4]</sup>

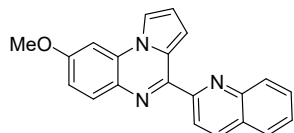

The title compound was prepared according to the general working procedure and purified by column chromatography (petroleum ether/ethyl acetate = 10:1) to give the product as a yellow solid. 79% yield, 77.7 mg.

$^1\text{H}$  NMR (500 MHz,  $\text{CDCl}_3$ )  $\delta$  8.63 (d,  $J = 8.5$  Hz, 1H), 8.29 (t,  $J = 9.1$  Hz, 2H), 8.11 (dd,  $J = 4.0, 1.3$  Hz, 1H), 8.04 (d,  $J = 8.9$  Hz, 1H), 7.92 (dd,  $J = 2.7, 1.3$  Hz, 1H), 7.90 – 7.84 (m, 1H), 7.79–7.75 (m, 1H), 7.63 – 7.54 (m, 1H), 7.29 (d,  $J = 2.6$  Hz, 1H), 7.07 (dd,  $J = 8.9, 2.6$  Hz, 1H), 7.01 (dd,  $J = 3.9, 2.8$  Hz, 1H), 3.97 (s, 3H).

$^{13}\text{C}$  NMR (125 MHz,  $\text{CDCl}_3$ )  $\delta$  159.85 (s), 156.26 (s), 148.35 (s), 147.61 (s), 136.29 (s), 131.74 (s), 130.06 (s), 130.01 (s), 129.53 (s), 128.61 (s), 128.21 (s), 127.62 (s), 127.15 (s), 124.66 (s), 120.55 (s), 114.77 (s), 113.89 (s), 113.05 (s), 110.89 (s), 97.40 (s), 55.83.

#### 8-methyl-4-(quinolin-2-yl)pyrrolo[1,2-*a*]quinoxaline(3ac)

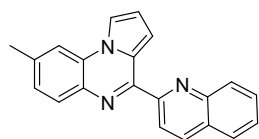

The title compound was prepared according to the general working procedure and purified by column chromatography (petroleum ether/ethyl acetate = 10:1) to give the product as a yellow solid. 81% yield, 75.8 mg. m.p. 153–155 °C.

$^1\text{H}$  NMR (500 MHz,  $\text{CDCl}_3$ )  $\delta$  8.66 (d,  $J = 8.6$  Hz, 1H), 8.33 (d,  $J = 8.6$  Hz, 1H), 8.28 (d,  $J = 8.4$  Hz, 1H), 8.13 – 8.06 (m, 2H), 8.01 (d,  $J = 1.2$  Hz, 1H), 7.89 (d,  $J = 8.1$  Hz, 1H), 7.81 – 7.73 (m, 1H), 7.69 (s, 1H), 7.60 (t,  $J = 7.4$  Hz, 1H), 7.29 (d,  $J = 8.2$  Hz, 1H), 7.01 (dd,  $J = 3.8, 2.8$  Hz, 1H), 2.56 (s, 3H).

$^{13}\text{C}$  NMR (125 MHz,  $\text{CDCl}_3$ )  $\delta$  155.4, 149.6, 147.6, 139.2, 136.5, 132.7, 130.1, 129.7, 129.6, 128.4, 127.7, 127.4, 127.4, 126.8, 124.6, 120.9, 115.0, 114.8, 113.8, 112.1, 22.0.

HRMS (ESI)  $m/z$  calcd for  $\text{C}_{21}\text{H}_{15}\text{N}_3$   $[\text{M}+\text{H}]^+$  310.1339, found 310.1346.

#### 8-fluoro-4-(quinolin-2-yl)pyrrolo[1,2-*a*]quinoxaline(3ad)<sup>[S4]</sup>

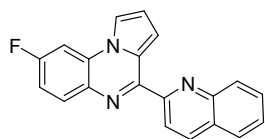

The title compound was prepared according to the general working procedure and purified by column chromatography (petroleum ether/ethyl acetate = 10:1) to give the product as a yellow solid. 90% yield, 85.3 mg.

$^1\text{H}$  NMR (500 MHz,  $\text{CDCl}_3$ )  $\delta$  8.60 (d,  $J = 8.6$  Hz, 1H), 8.29 (dd,  $J = 13.7, 8.5$  Hz, 2H), 8.12 (dd,  $J = 4.0, 1.3$  Hz, 1H), 8.09 (dd,  $J = 8.9, 5.9$  Hz, 1H), 7.91 – 7.84 (m, 2H), 7.79–7.76 (m, 1H), 7.63–7.58 (m, 1H), 7.54 (dd,  $J = 9.2, 2.6$  Hz, 1H), 7.19 (td,  $J = 8.6, 2.6$  Hz, 1H), 7.01 (dd,  $J = 3.9, 2.8$  Hz, 1H).

$^{13}\text{C}$  NMR (125 MHz,  $\text{CDCl}_3$ )  $\delta$  162.0 (d,  $J = 249.4$  Hz), 155.7, 150.0 (d,  $J = 2.7$  Hz), 147.5, 136.4, 132.2 (d,  $J = 9.9$  Hz), 132.1, 130.1, 129.7, 128.5 (d,  $J = 11.4$  Hz), 128.3, 127.6, 127.4, 124.3, 120.5, 115.2, 114.7, 113.2 (d,  $J = 23.2$  Hz), 111.9, 100.6 (d,  $J = 26.8$  Hz).

$^{19}\text{F}$  NMR (470 MHz,  $\text{CDCl}_3$ )  $\delta$  -109.53.

#### 8-chloro-4-(quinolin-2-yl)pyrrolo[1,2-*a*]quinoxaline(3ae)

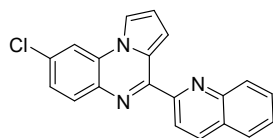

The title compound was prepared according to the general working procedure and purified by column chromatography (petroleum ether/ethyl acetate = 10:1) to give the product as a yellow solid. 92% yield, 91.6 mg. m.p. 212-214 °C.

**<sup>1</sup>H NMR** (500 MHz, CDCl<sub>3</sub>) δ 8.61 (d, *J* = 8.6 Hz, 1H), 8.30 (dd, *J* = 19.9, 8.5 Hz, 2H), 8.14 (d, *J* = 2.9 Hz, 1H), 8.03 (d, *J* = 8.5 Hz, 1H), 7.95 (s, 1H), 7.89 (d, *J* = 8.2 Hz, 2H), 7.79 (t, *J* = 7.5 Hz, 1H), 7.62 (t, *J* = 7.4 Hz, 1H), 7.42 (d, *J* = 8.6 Hz, 1H), 7.03 (s, 1H).

**<sup>13</sup>C NMR** (125 MHz, CDCl<sub>3</sub>) δ 155.7, 150.9, 147.6, 136.4, 134.1, 133.7, 131.5, 130.1, 129.7, 128.4, 128.3, 127.6, 127.5, 125.6, 124.6, 120.5, 115.3, 114.7, 113.9, 112.1.

HRMS (ESI) *m/z* calcd for C<sub>20</sub>H<sub>12</sub>ClN<sub>3</sub> [M+H]<sup>+</sup> 330.0793, found 330.0796.

#### 7-methoxy-4-(quinolin-2-yl)pyrrolo[1,2-a]quinoxaline(3af)

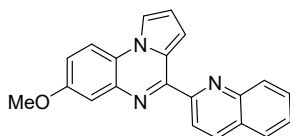

The title compound was prepared according to the general working procedure and purified by column chromatography (petroleum ether/ethyl acetate = 10:1) to give the product as a yellow solid. 72% yield, 70.8 mg. m.p. 201-203 °C.

**<sup>1</sup>H NMR** (500 MHz, CDCl<sub>3</sub>) δ 8.61 (d, *J* = 8.6 Hz, 1H), 8.33 (d, *J* = 8.6 Hz, 1H), 8.29 (d, *J* = 8.4 Hz, 1H), 8.05 (dd, *J* = 4.1, 1.3 Hz, 1H), 7.97 (dd, *J* = 2.6, 1.3 Hz, 1H), 7.90 (d, *J* = 7.3 Hz, 1H), 7.82 (d, *J* = 9.0 Hz, 1H), 7.81-7.76 (m, 1H), 7.64 – 7.55 (m, 2H), 7.18 (dd, *J* = 9.0, 2.8 Hz, 1H), 6.98 (dd, *J* = 4.0, 2.6 Hz, 1H), 3.95 (s, 3H).

**<sup>13</sup>C NMR** (125 MHz, CDCl<sub>3</sub>) δ 157.2, 156.0, 151.2, 147.6, 136.6, 136.5, 130.2, 129.7, 128.3, 127.6, 127.4, 124.5, 122.1, 120.7, 117.7, 114.7, 114.5, 114.2, 111.4, 111.1, 55.8.

HRMS (ESI) *m/z* calcd for C<sub>21</sub>H<sub>15</sub>N<sub>3</sub>O [M+H]<sup>+</sup> 326.1288, found 326.1297.

#### 7-methyl-4-(quinolin-2-yl)pyrrolo[1,2-a]quinoxaline(3ag)<sup>[S4]</sup>

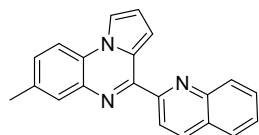

The title compound was prepared according to the general working procedure and purified by column chromatography (petroleum ether/ethyl acetate = 10:1) to give the product as a yellow solid. 93% yield, 87.1 mg.

**<sup>1</sup>H NMR** (500 MHz, CDCl<sub>3</sub>) δ 8.63 (d, *J* = 8.6 Hz, 1H), 8.31 (dd, *J* = 11.5, 8.6 Hz, 2H), 8.09 (dd, *J* = 3.9, 0.9 Hz, 1H), 7.99 (d, *J* = 1.2 Hz, 1H), 7.92 (s, 1H), 7.89 (d, *J* = 8.1 Hz, 1H), 7.81 – 7.74 (m, 2H), 7.60 (t, *J* = 7.4 Hz, 1H), 7.35 (dd, *J* = 8.3, 1.4 Hz, 1H), 6.99 (dd, *J* = 3.7, 2.8 Hz, 1H), 2.52 (s, 3H).

**<sup>13</sup>C NMR** (125 MHz, CDCl<sub>3</sub>) δ 156.2, 150.8, 147.6, 136.4, 135.5, 135.0, 130.2, 130.1, 129.6, 129.5, 128.3, 127.6, 127.3, 125.6, 124.7, 120.7, 114.4, 114.2, 113.5, 111.2, 21.1.

#### 7-fluoro-4-(quinolin-2-yl)pyrrolo[1,2-a]quinoxaline(3ah)

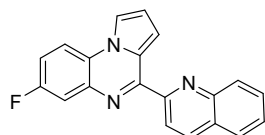

The title compound was prepared according to the general working procedure and purified by column chromatography (petroleum ether/ethyl acetate = 10:1) to give the product as a yellow solid. 85% yield, 80.6 mg. m.p. 170-172 °C.

**<sup>1</sup>H NMR** (500 MHz, CDCl<sub>3</sub>) δ 8.60 (d, *J* = 8.6 Hz, 1H), 8.30 (dd, *J* = 14.0, 8.6 Hz, 2H), 8.13 (dd, *J* = 4.0, 1.1 Hz, 1H), 7.99 – 7.93 (m, 1H), 7.88 (d, *J* = 8.1 Hz, 1H), 7.83 (dd, *J* = 9.0, 5.0 Hz, 1H), 7.80 – 7.74 (m, 2H), 7.64 – 7.57 (m, 1H), 7.29-7.23 (m, 1H), 7.01-6.97 (m, 1H).



<sup>13</sup>C NMR (125 MHz, CDCl<sub>3</sub>) δ 159.8 (d, *J* = 243.7 Hz), 155.7, 151.8, 147.6, 136.7 (d, *J* = 11.4 Hz), 136.5, 130.1, 129.7, 128.4, 127.6, 127.5, 124.5, 124.4 (d, *J* = 1.9 Hz), 120.6, 115.9 (d, *J* = 24.6 Hz), 115.5 (d, *J* = 22.2 Hz), 114.9, 114.8, 114.7 (d, *J* = 17.0 Hz), 111.9.

<sup>19</sup>F NMR (470 MHz, CDCl<sub>3</sub>) δ -116.83.

HRMS (ESI) *m/z* calcd for C<sub>20</sub>H<sub>12</sub>FN<sub>3</sub> [M+H]<sup>+</sup> 314.1088, found 314.1097.

#### 7-chloro-4-(quinolin-2-yl)pyrrolo[1,2-*a*]quinoxaline(3ai)

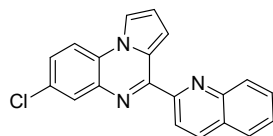

The title compound was prepared according to the general working procedure and purified by column chromatography (petroleum ether/ethyl acetate = 10:1) to give the product as a yellow solid. 87% yield, 86.7 mg. m.p. 202-204 °C.

<sup>1</sup>H NMR (500 MHz, CDCl<sub>3</sub>) δ 8.61 (d, *J* = 8.6 Hz, 1H), 8.32 (d, *J* = 8.6 Hz, 1H), 8.28 (d, *J* = 8.4 Hz, 1H), 8.14 (dd, *J* = 4.0, 1.2 Hz, 1H), 8.10 (d, *J* = 2.2 Hz, 1H), 7.99 (dd, *J* = 2.6, 1.2 Hz, 1H), 7.89 (d, *J* = 8.0 Hz, 1H), 7.85 – 7.75 (m, 2H), 7.66 – 7.58 (m, 1H), 7.49 (dd, *J* = 8.7, 2.3 Hz, 1H), 7.01 (dd, *J* = 4.0, 2.7 Hz, 1H).

<sup>13</sup>C NMR (125 MHz, CDCl<sub>3</sub>) δ 155.8, 151.8, 147.5, 136.6, 136.5, 130.2, 130.1, 129.8, 129.7, 128.4, 128.2, 127.7, 127.5, 126.4, 124.6, 120.6, 115.0, 114.9, 114.6, 112.0.

HRMS (ESI) *m/z* calcd for C<sub>20</sub>H<sub>12</sub>ClN<sub>3</sub> [M+H]<sup>+</sup> 330.0793, found 330.0802.

#### 4-(quinolin-2-yl)-7-(trifluoromethyl)pyrrolo[1,2-*a*]quinoxaline(3aj)

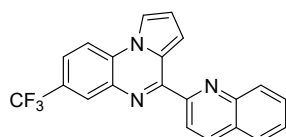

The title compound was prepared according to the general working procedure and purified by column chromatography (petroleum ether/ethyl acetate = 10:1) to give the product as a yellow solid. 92% yield, 101.1 mg. m.p. 172-174 °C.

<sup>1</sup>H NMR (500 MHz, CDCl<sub>3</sub>) δ 8.56 (d, *J* = 8.6 Hz, 1H), 8.30 (s, 1H), 8.24 (d, *J* = 8.4 Hz, 2H), 8.19 (dd, *J* = 3.9, 1.0 Hz, 1H), 7.94 (m, 1H), 7.84 (d, *J* = 8.3 Hz, 2H), 7.77 (m, 1H), 7.71 – 7.65 (m, 1H), 7.59 (t, *J* = 7.5 Hz, 1H), 6.99 (m, 1H).

<sup>13</sup>C NMR (125 MHz, CDCl<sub>3</sub>) δ 155.6, 151.8, 147.5, 136.3, 135.2, 130.1, 129.7, 129.6, 128.4, 127.9 (q, *J* = 3.4 Hz), 127.6, 127.5, 127.1 (q, *J* = 33.2 Hz), 124.7, 124.3 (q, *J* = 3.4 Hz), 124.0 (q, *J* = 271.8 Hz), 120.4, 115.5, 114.9, 114.3, 112.6.

<sup>19</sup>F NMR (470 MHz, CDCl<sub>3</sub>) δ -61.84.

HRMS (ESI) *m/z* calcd for C<sub>21</sub>H<sub>12</sub>F<sub>3</sub>N<sub>3</sub> [M+H]<sup>+</sup> 364.1056, found 364.1064.

#### 6-chloro-4-(quinolin-2-yl)pyrrolo[1,2-*a*]quinoxaline(3ak)

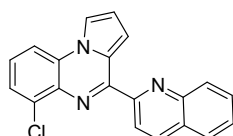

The title compound was prepared according to the general working procedure and purified by column chromatography (petroleum ether/ethyl acetate = 10:1) to give the product as a yellow solid. 81% yield, 80.7 mg. m.p. 199-201 °C.

<sup>1</sup>H NMR (500 MHz, CDCl<sub>3</sub>) δ 8.83 (d, *J* = 8.6 Hz, 1H), 8.42 – 8.25 (m, 3H), 8.02 (dd, *J* = 2.5, 1.1 Hz, 1H), 7.90 (d, *J* = 8.1 Hz, 1H), 7.84 – 7.74 (m, 2H), 7.67 – 7.59 (m, 1H), 7.57 (dd, *J* = 7.8, 1.0 Hz, 1H), 7.44 (t, *J* = 8.1 Hz, 1H), 7.05 (dd, *J* = 3.9, 2.8 Hz, 1H).

<sup>13</sup>C NMR (125 MHz, CDCl<sub>3</sub>) δ 156.0, 150.5, 147.4, 136.5, 135.0, 132.7, 130.1, 129.6, 129.0, 128.5, 127.9, 127.7, 127.5, 125.8, 124.7, 120.9, 115.4, 115.0, 112.5, 112.2.

HRMS (ESI) *m/z* calcd for C<sub>20</sub>H<sub>12</sub>ClN<sub>3</sub> [M+H]<sup>+</sup> 330.0793, found 330.0802.

## References

- [S1] W. Bi, C. Qu, X. Chen, S. Wei, L. Qu, S. Liu, K. Sun, Y. Zhao, *Tetrahedron*, 2018, **74**, 1908-1917.
- [S2] X. Zhang, X. Miao, Y. Zhou, Y. Wang, Y. Song, H. Liu, Y. Xiong, L. Li, A. Wu, Y. Zhu, *Org. Biomol. Chem.*, 2022, **20**, 1236-1242
- [S3] C. Dai, S. Deng, Q. Zhu and X. Tang, *RSC Adv.*, 2017, **7**, 44132-44135.
- [S4] X. Pang, M. Wu, J. Ni, F. Zhang, J. Lan, B. Chen, and R. Yan, *J. Org. Chem.* 2017, **82**, 10110-10120.
- [S5] B. Sridevi, S. Reddy Kandimalla and B. Subba Reddy, *Eur. J. Org. Chem.*, 2019, **40**, 6800-6806.

## Copies of Product NMR Spectra

### 4-(quinolin-2-yl)pyrrolo[1,2-*a*]quinoxaline(3aa)<sup>[S3]</sup>

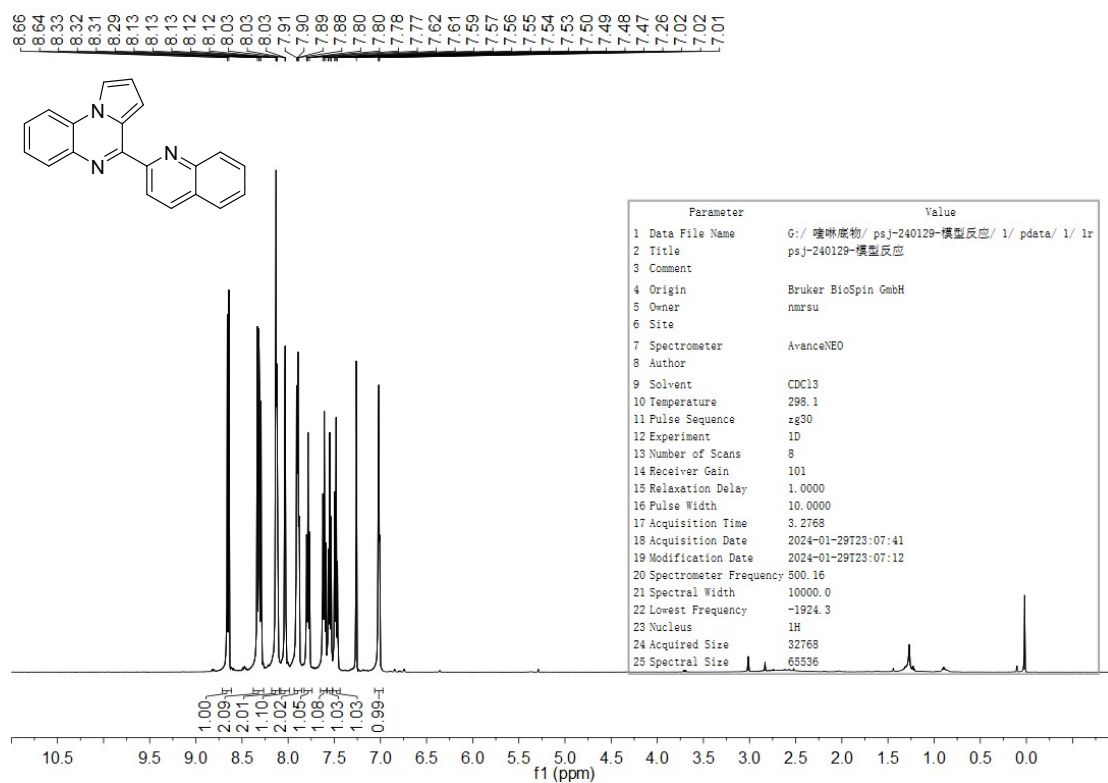

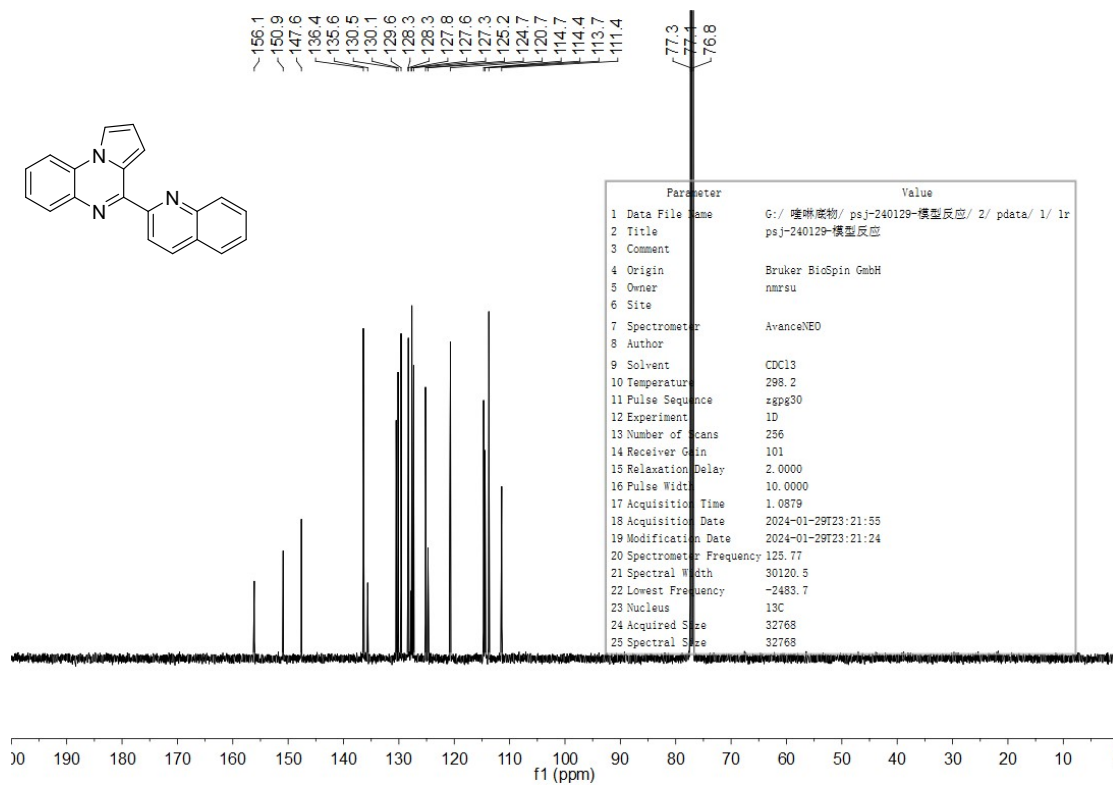

**ethyl 2-(pyrrolo[1,2-a]quinoxalin-4-yl)quinoline-3-carboxylate(3ba)**

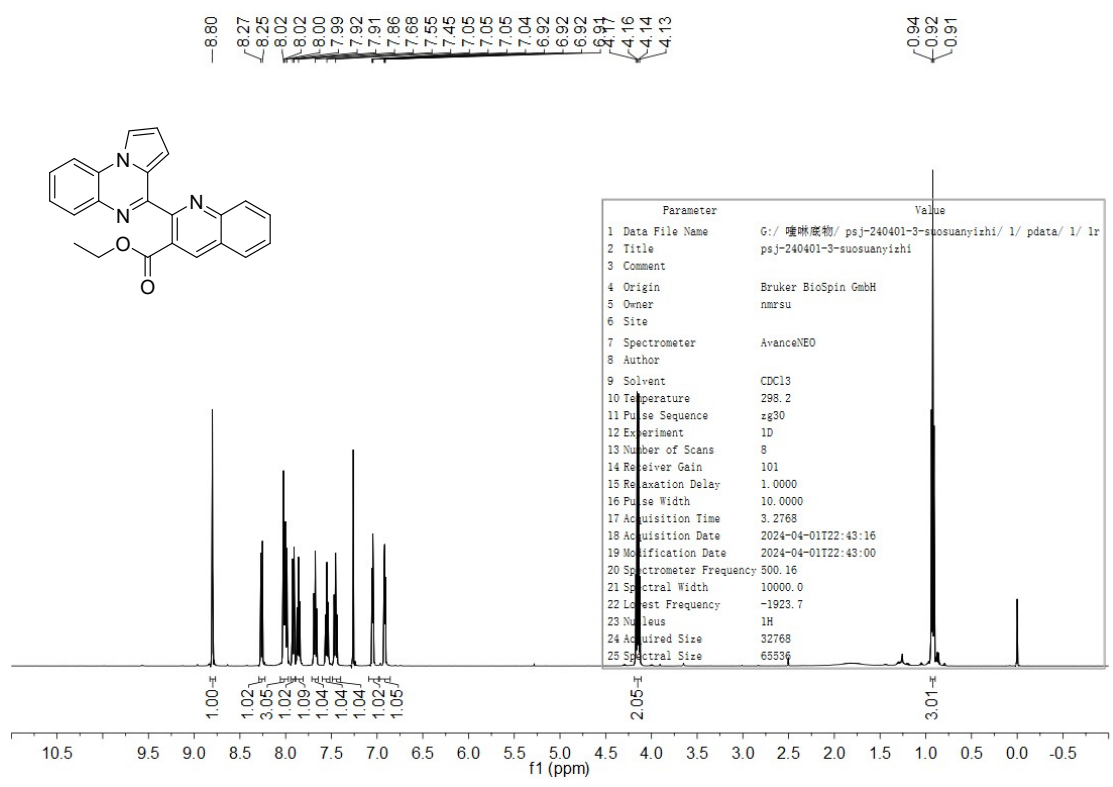

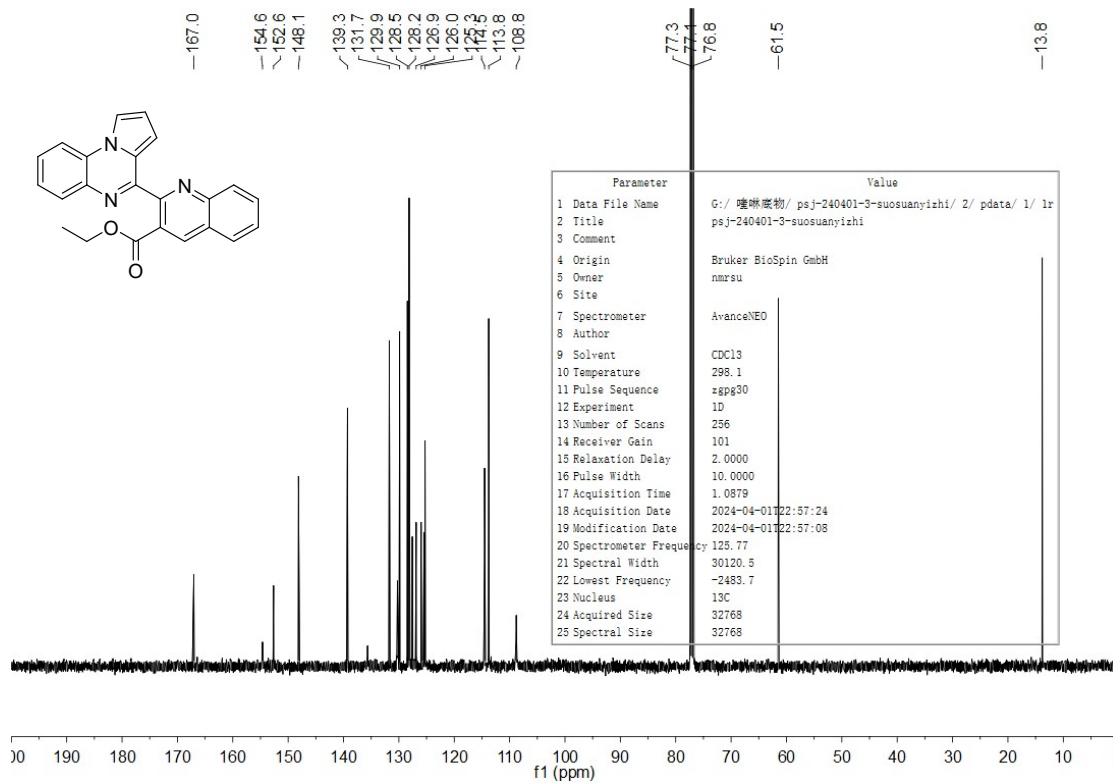

#### 4-(5-methoxyquinolin-2-yl)pyrrolo[1,2-a]quinoxaline(3ca)

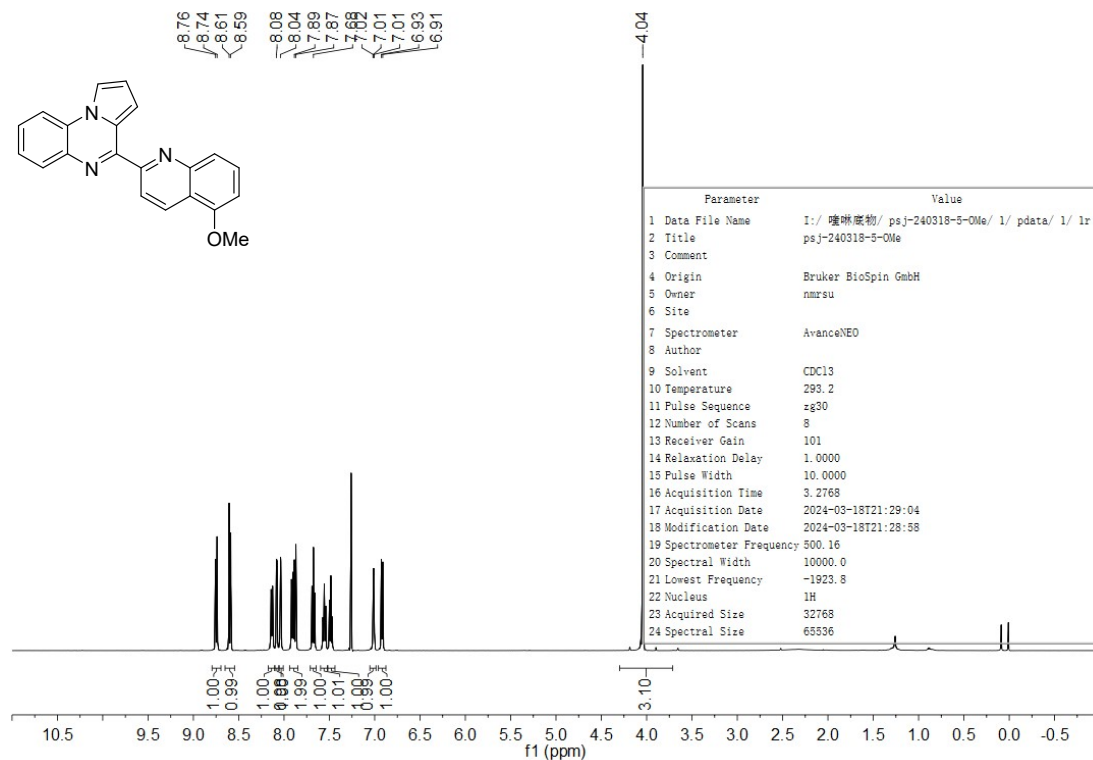

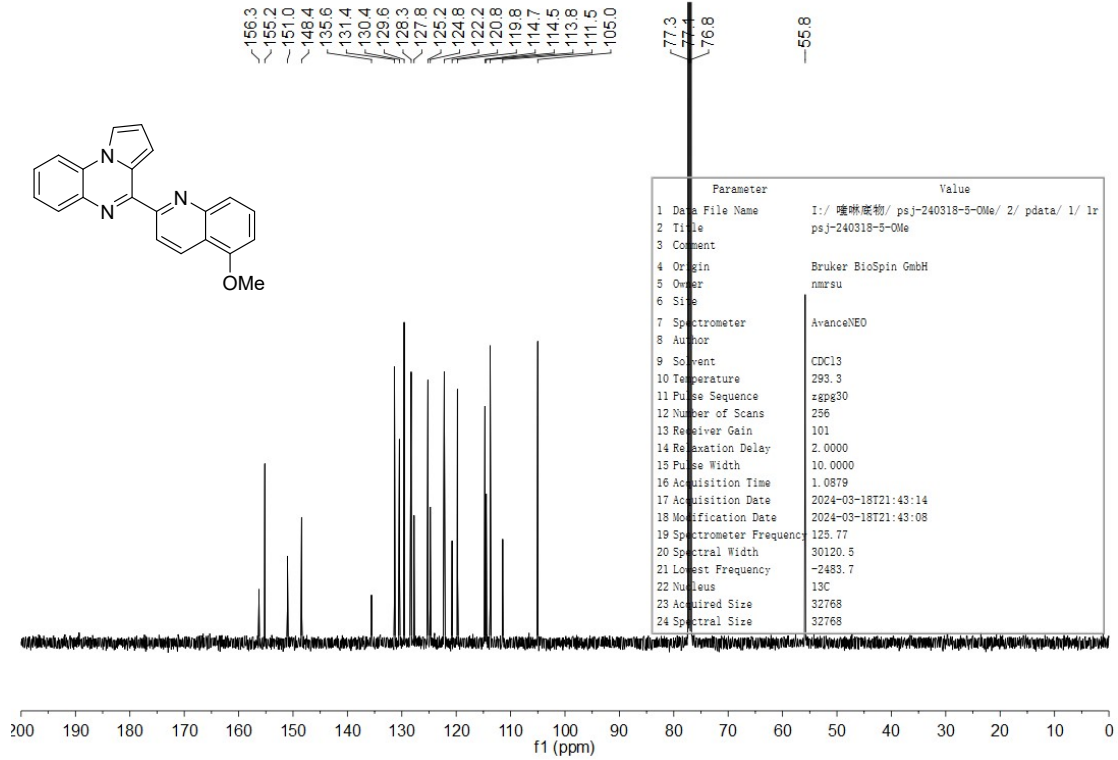

4-(6-methylquinolin-2-yl)pyrrolo[1,2-a]quinoxaline (3da) <sup>1</sup>H NMR

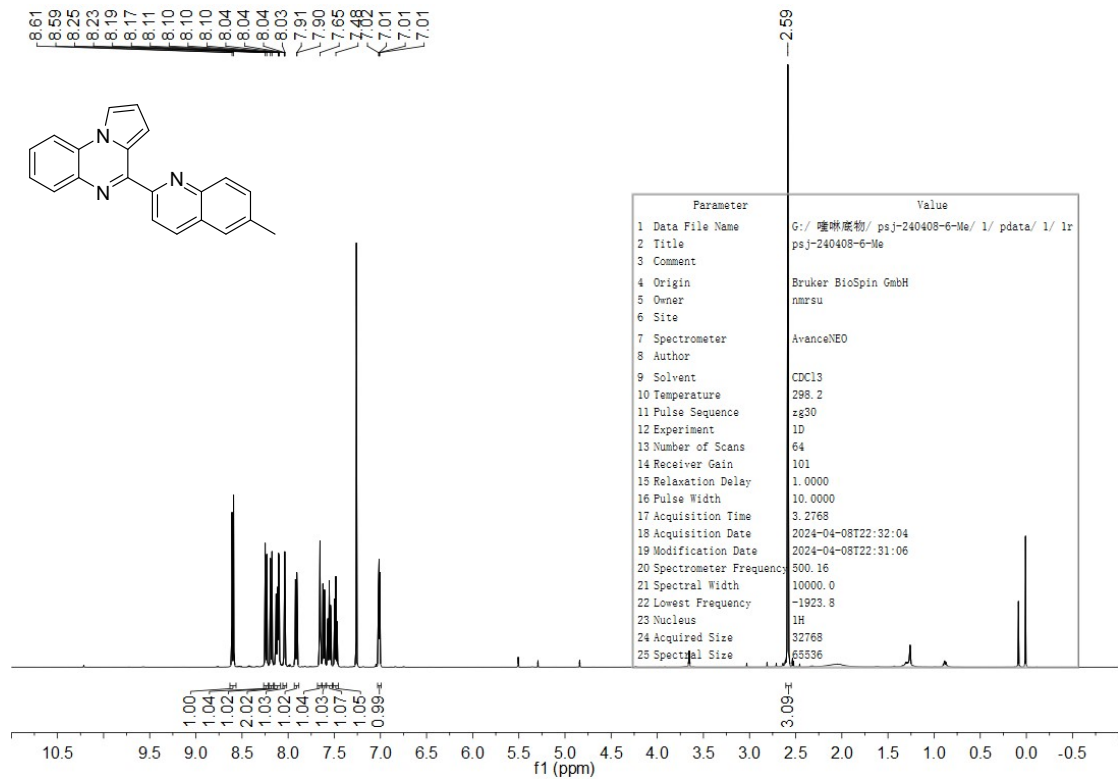

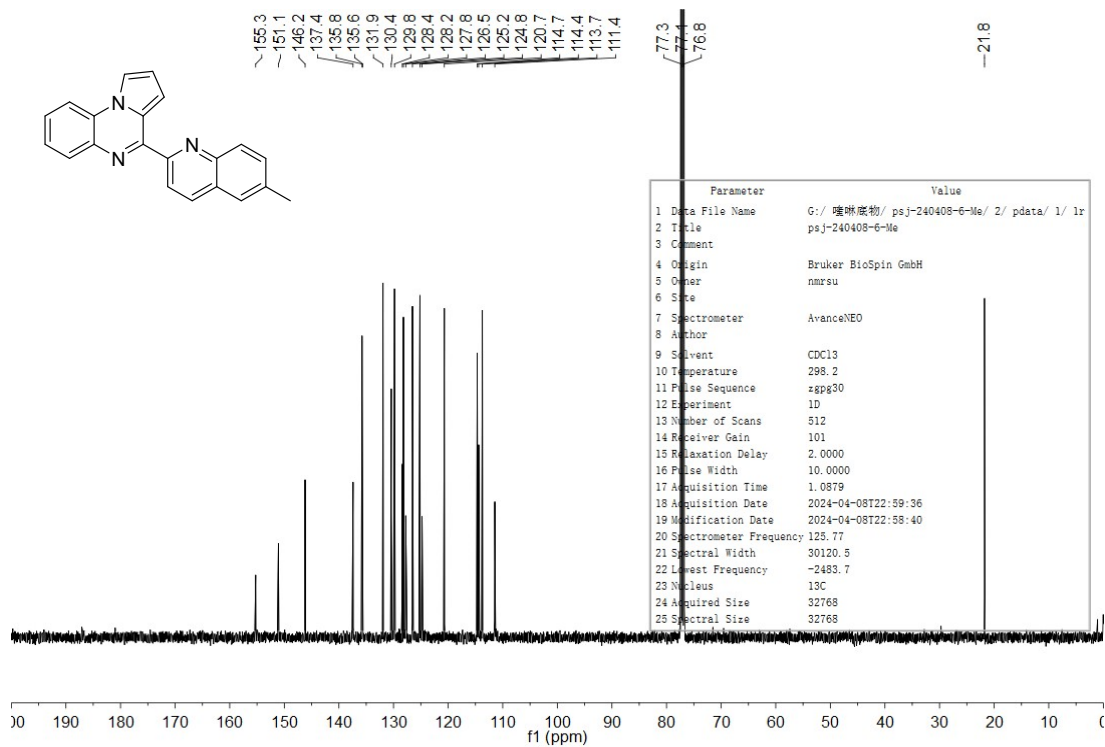

**4-(6-methoxyquinolin-2-yl)pyrrolo[1,2-a]quinoxaline(3ea)**

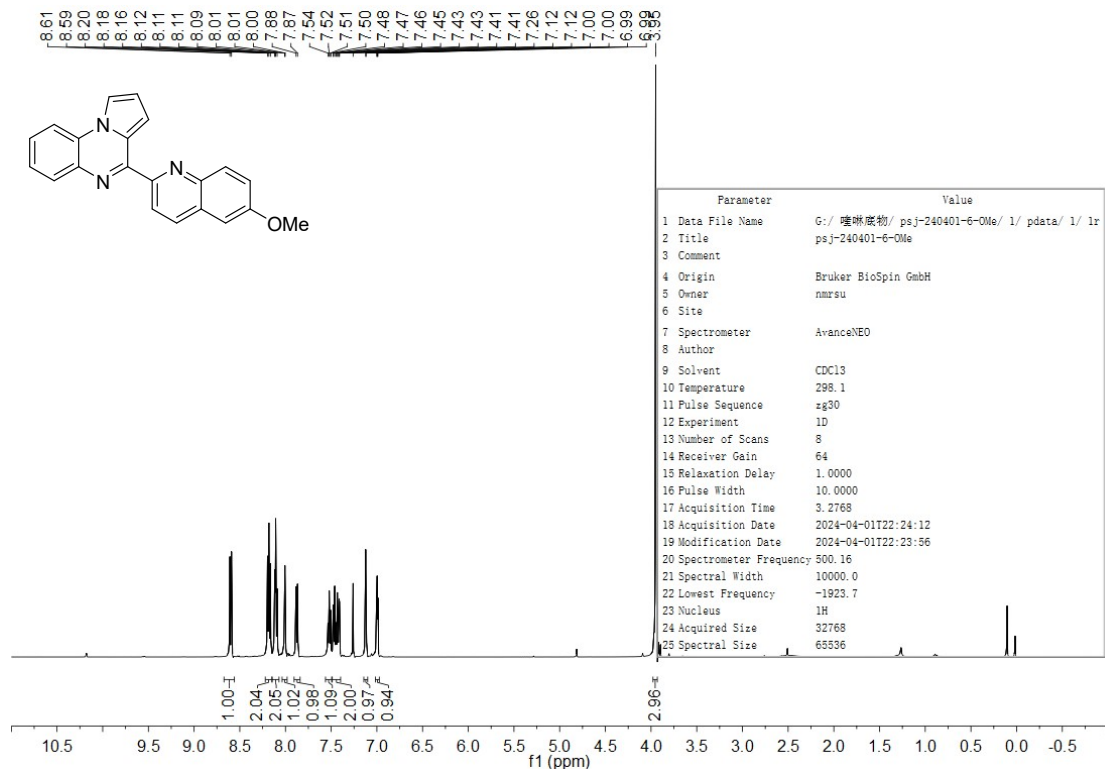

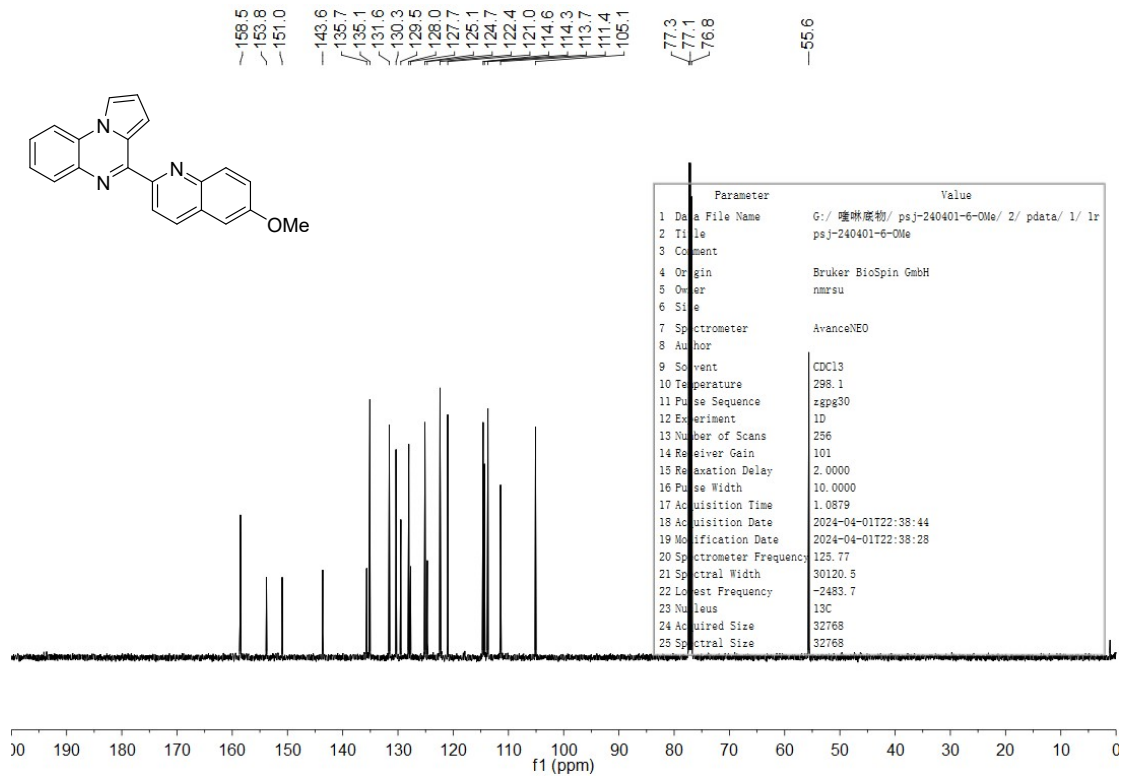

#### 4-(7-methoxyquinolin-2-yl)pyrrolo[1,2-a]quinoxaline(3fa)

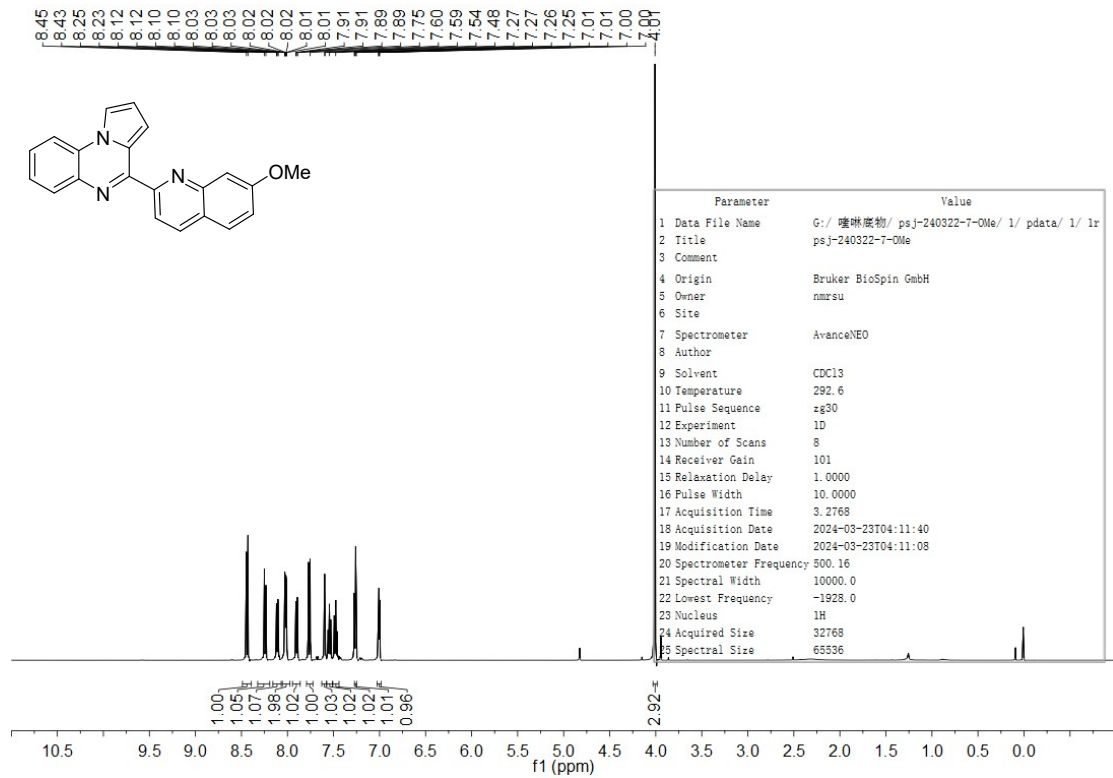

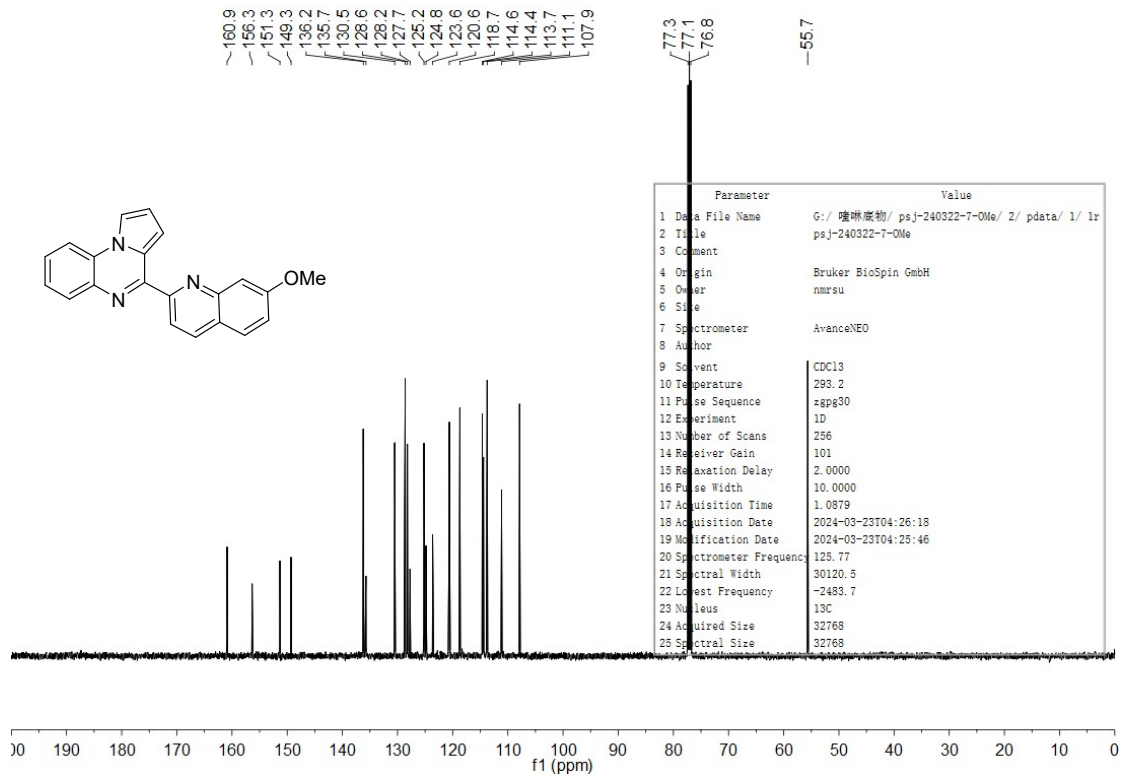

**4-(8-methylquinolin-2-yl)pyrrolo[1,2-a]quinoxaline(3ga)**

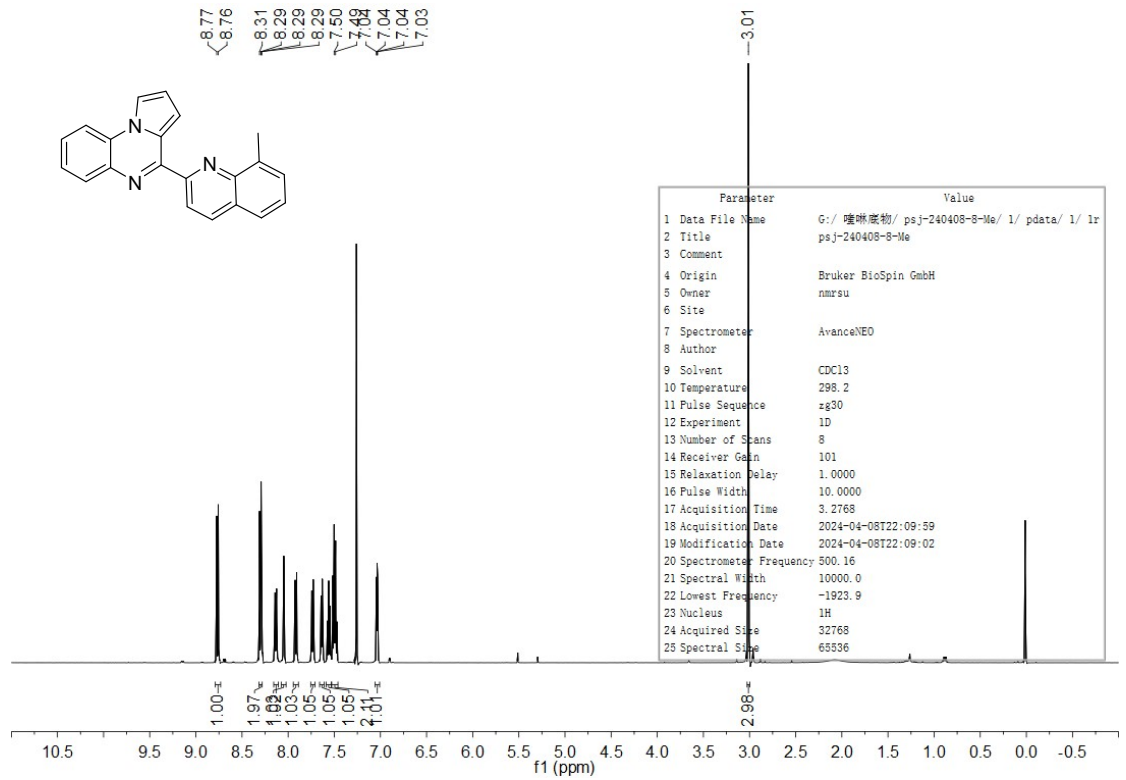



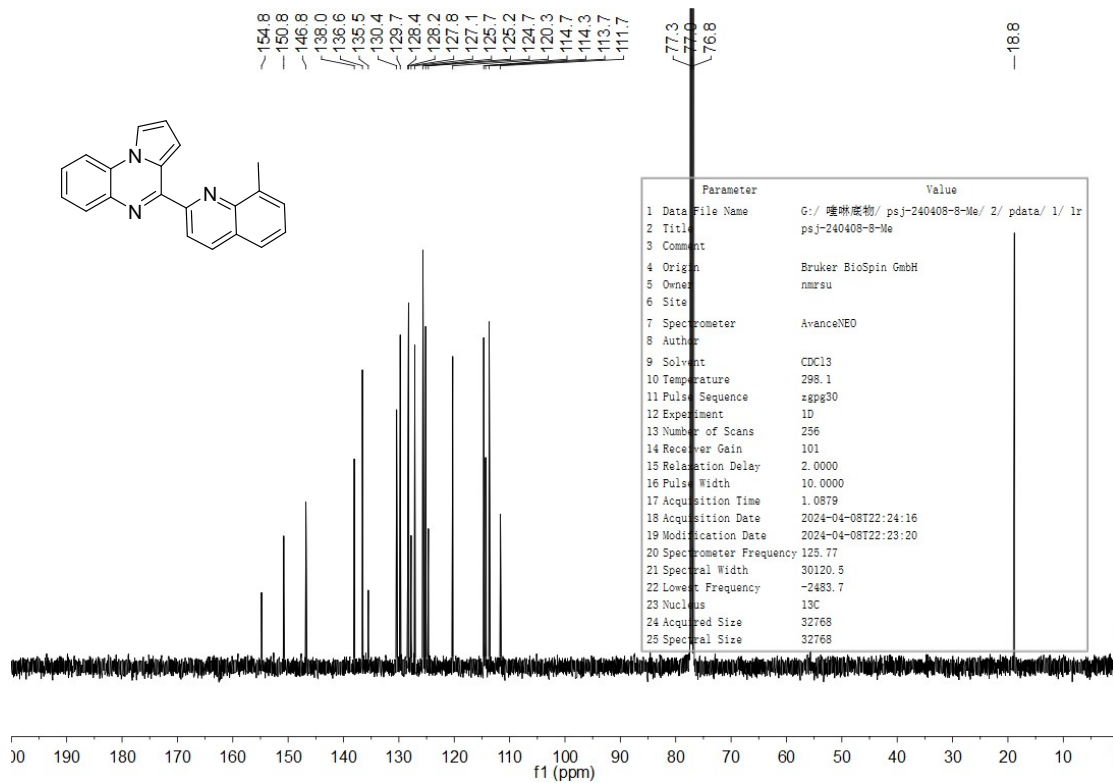

-188

#### 4-(8-methoxyquinolin-2-yl)pyrrolo[1,2-a]quinoxaline(3ha)

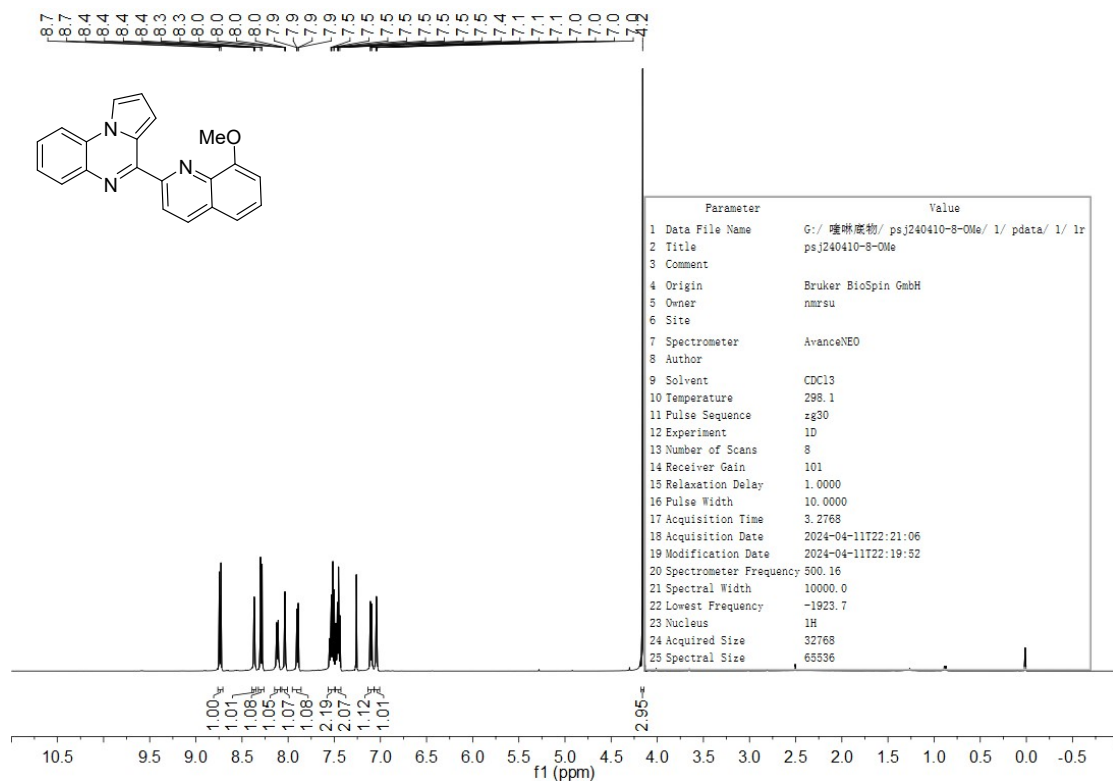

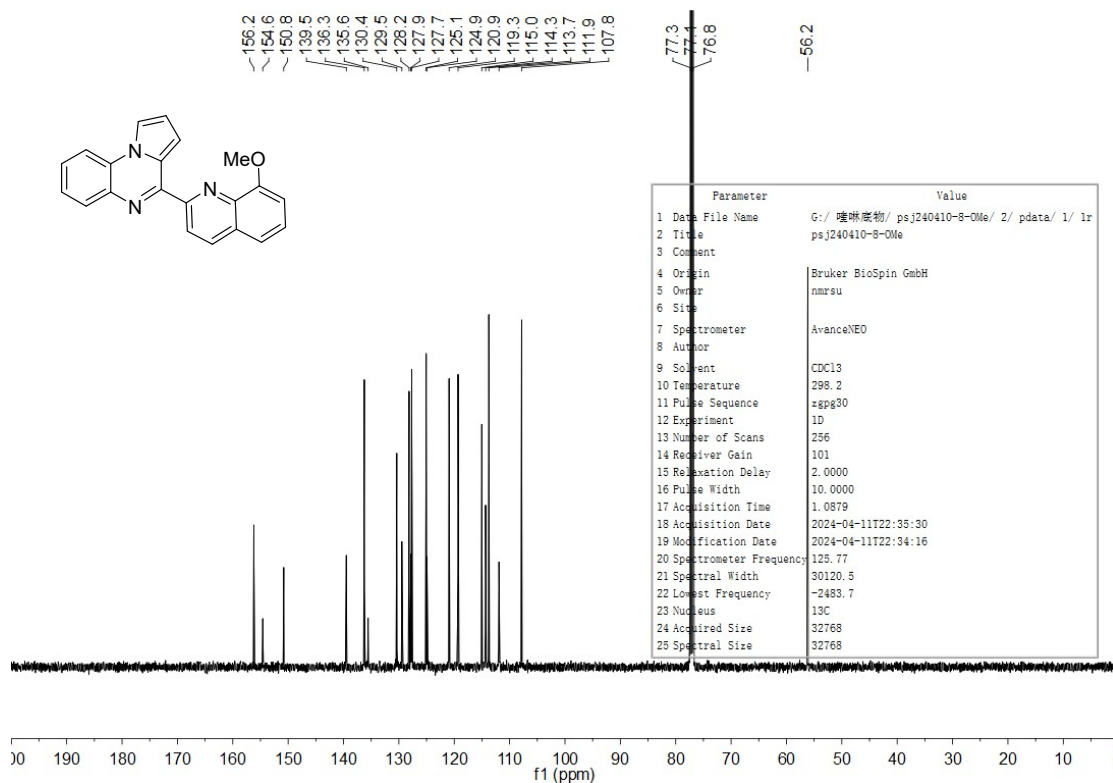

#### 4-(5-bromoquinolin-2-yl)pyrrolo[1,2-a]quinoxaline(3ia)

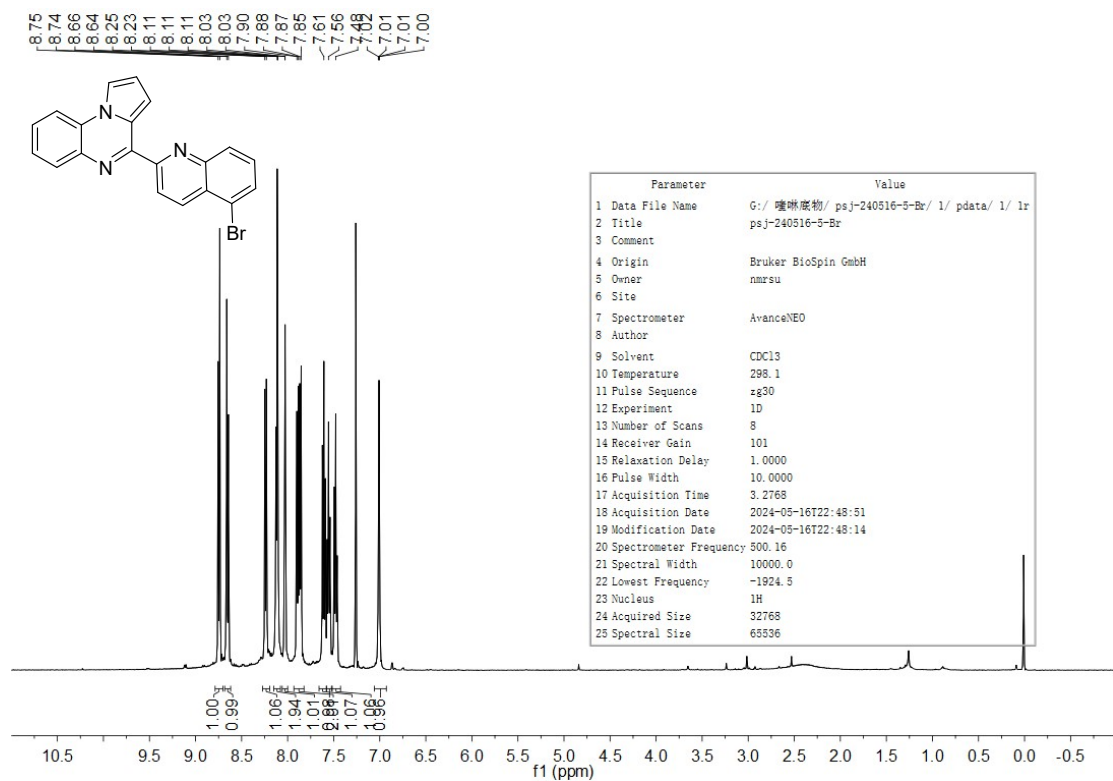

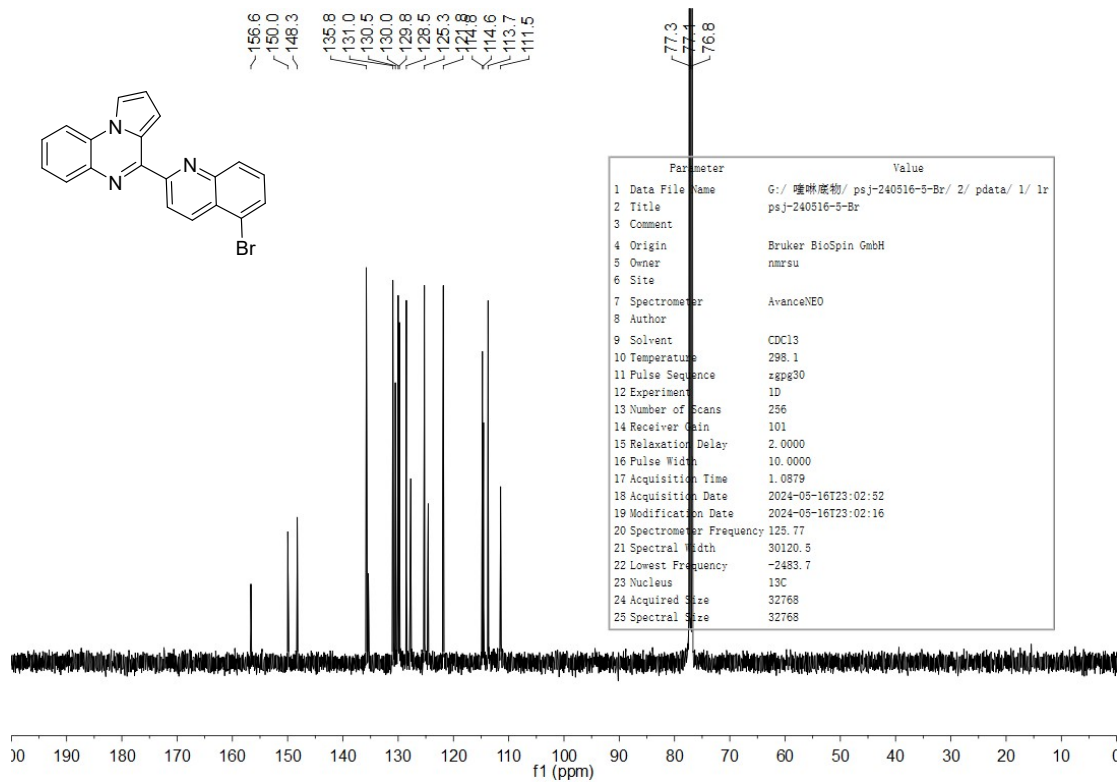

#### 4-(5-chloroquinolin-2-yl)pyrrolo[1,2-a]quinoxaline(3ja)

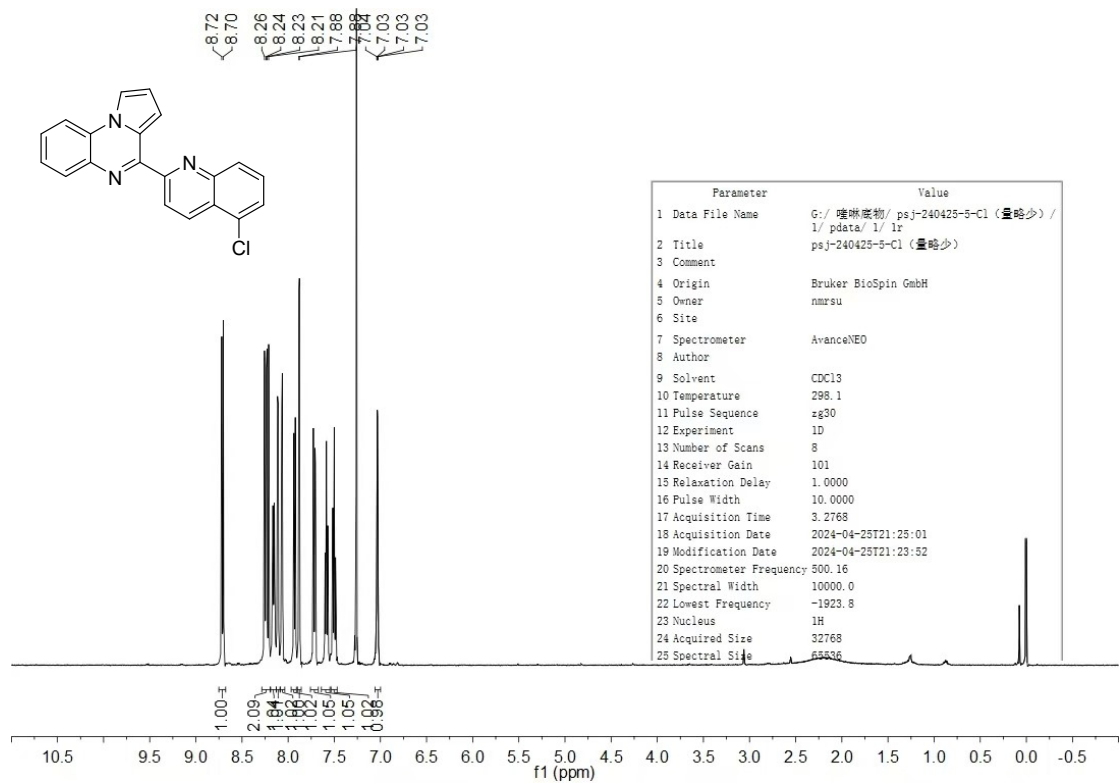

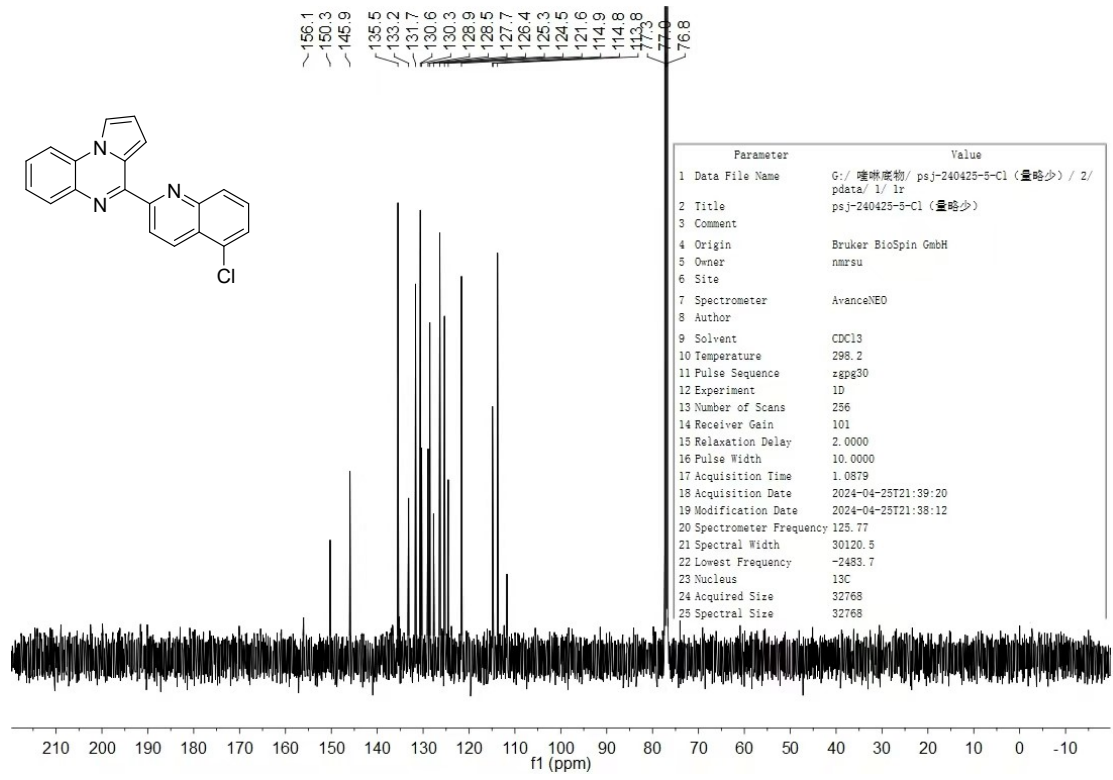

**4-(6-fluoroquinolin-2-yl)pyrrolo[1,2-a]quinoxaline(3ka)<sup>[S5]</sup>**

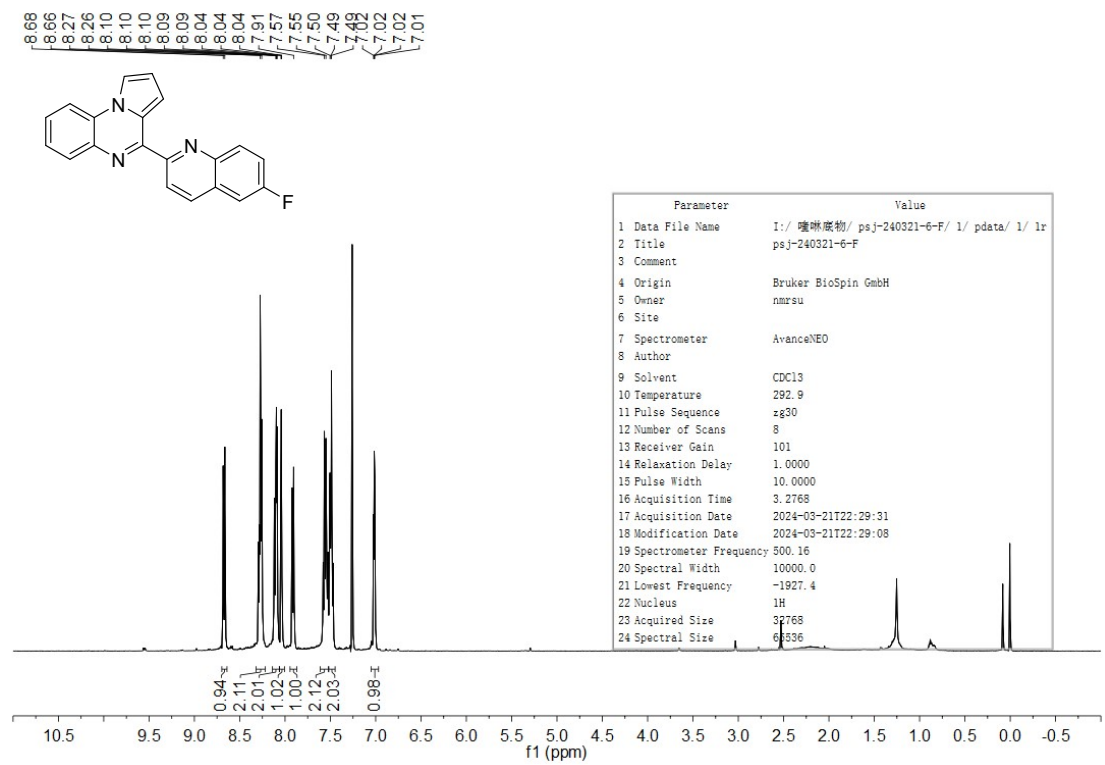

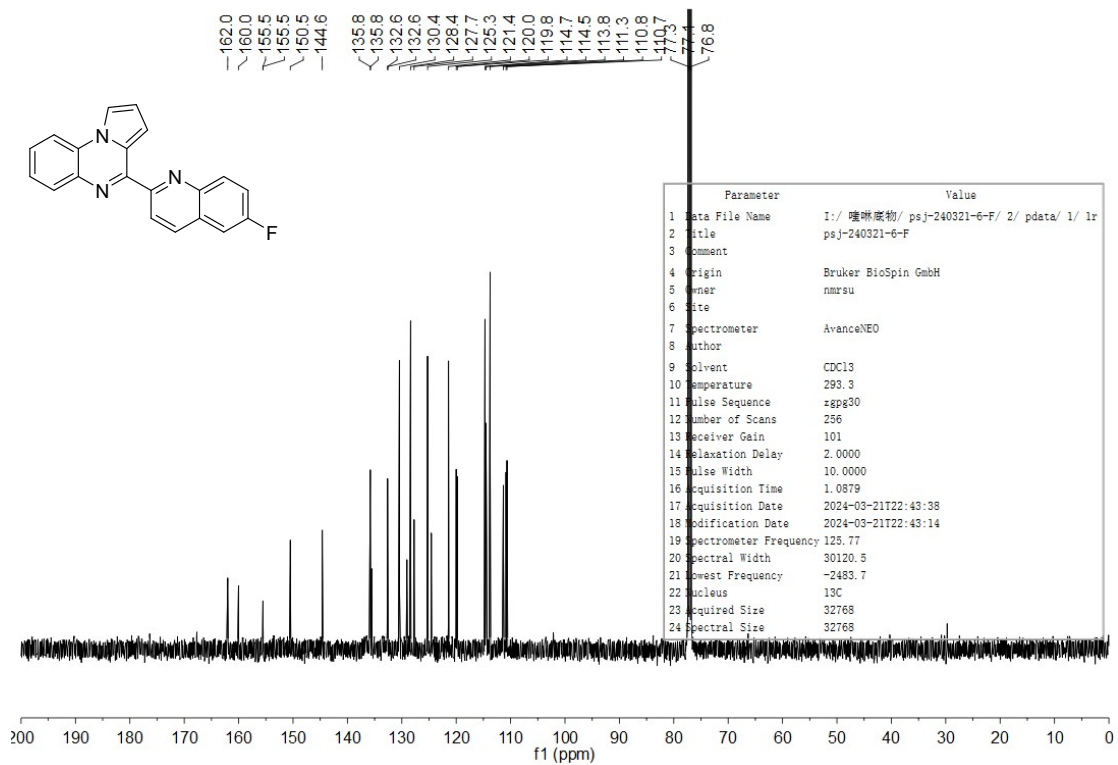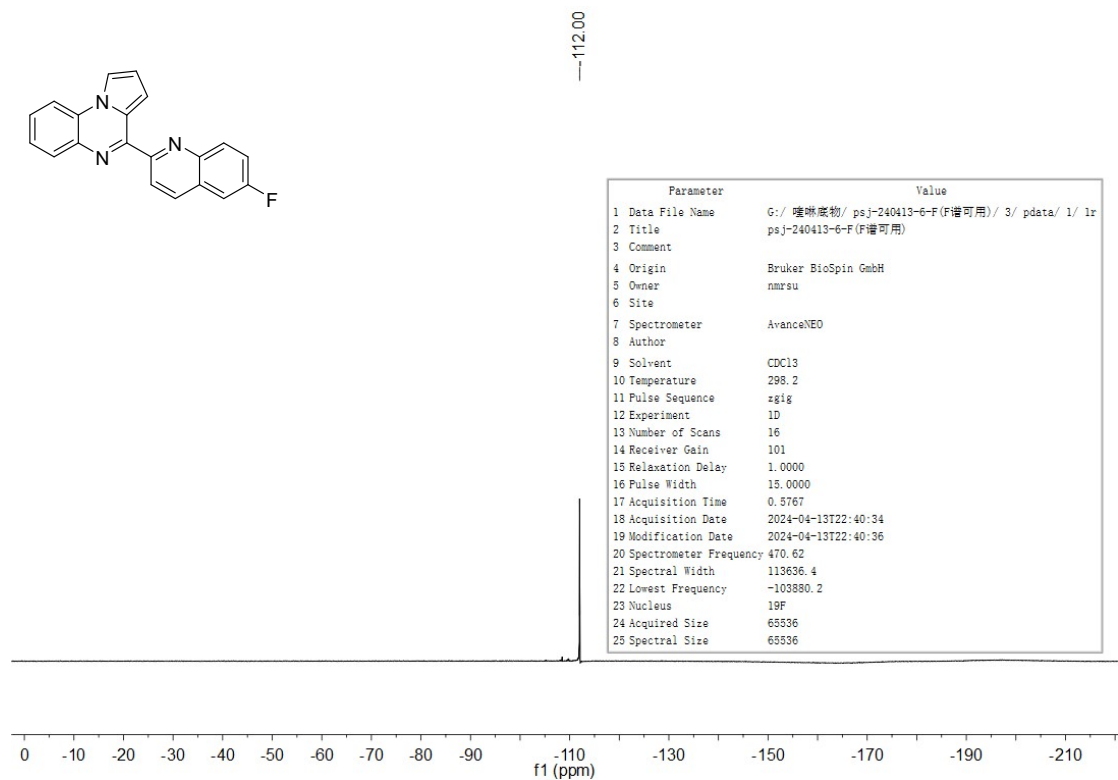

4-(6-chloroquinolin-2-yl)pyrrolo[1,2-a]quinoxaline(31a)

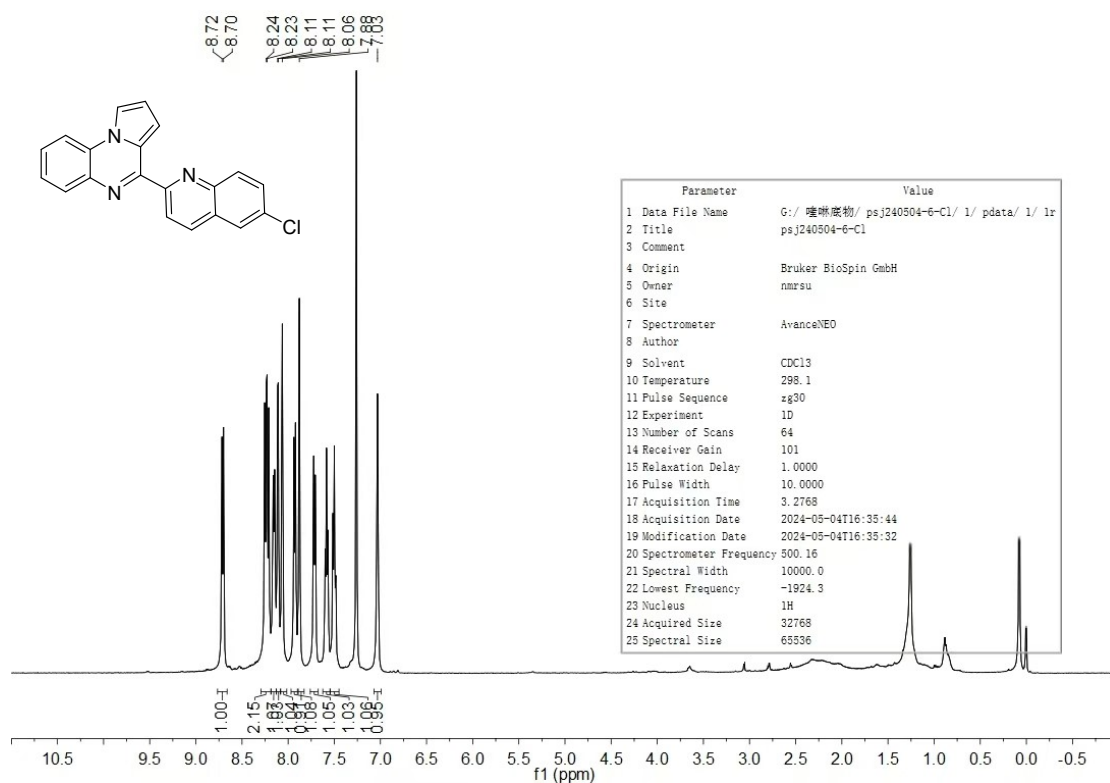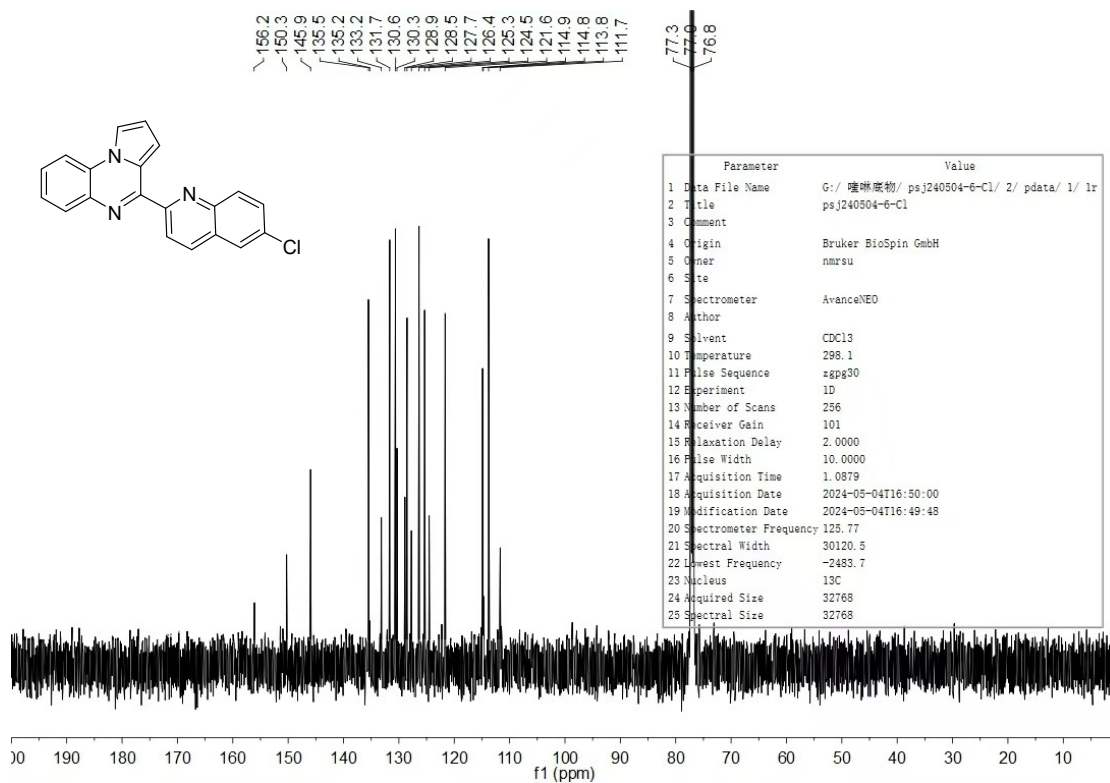

4-(6-bromoquinolin-2-yl)pyrrolo[1,2-a]quinoxaline(3ma)

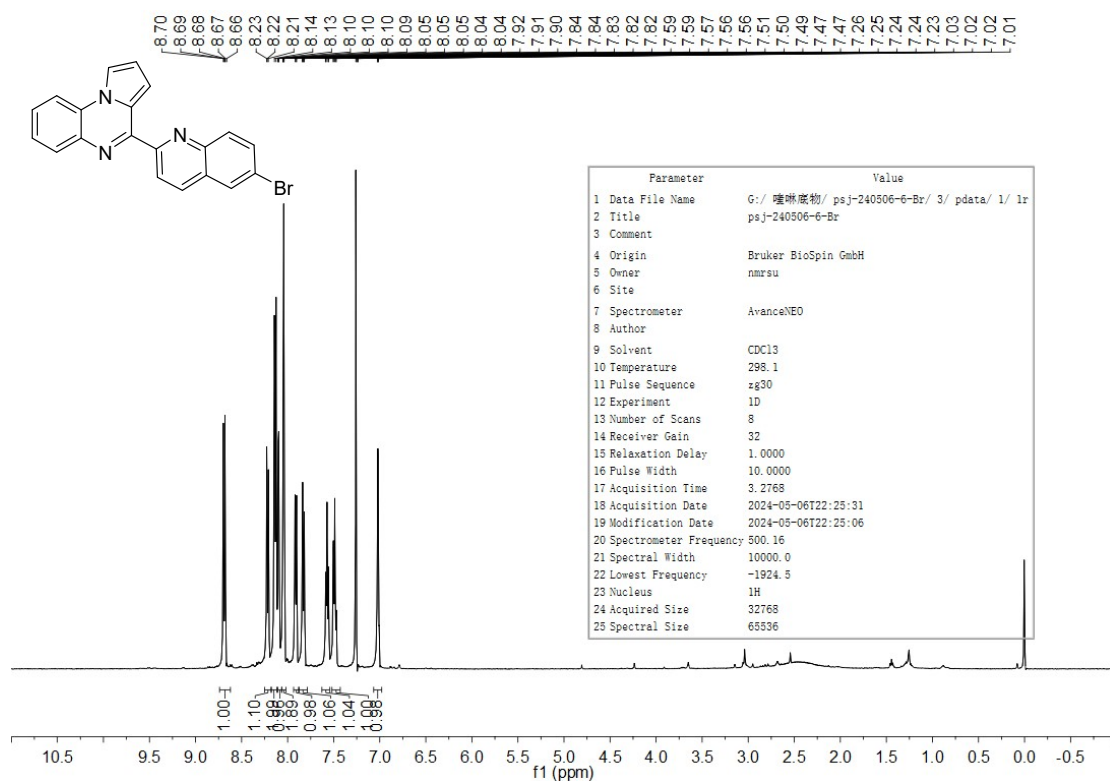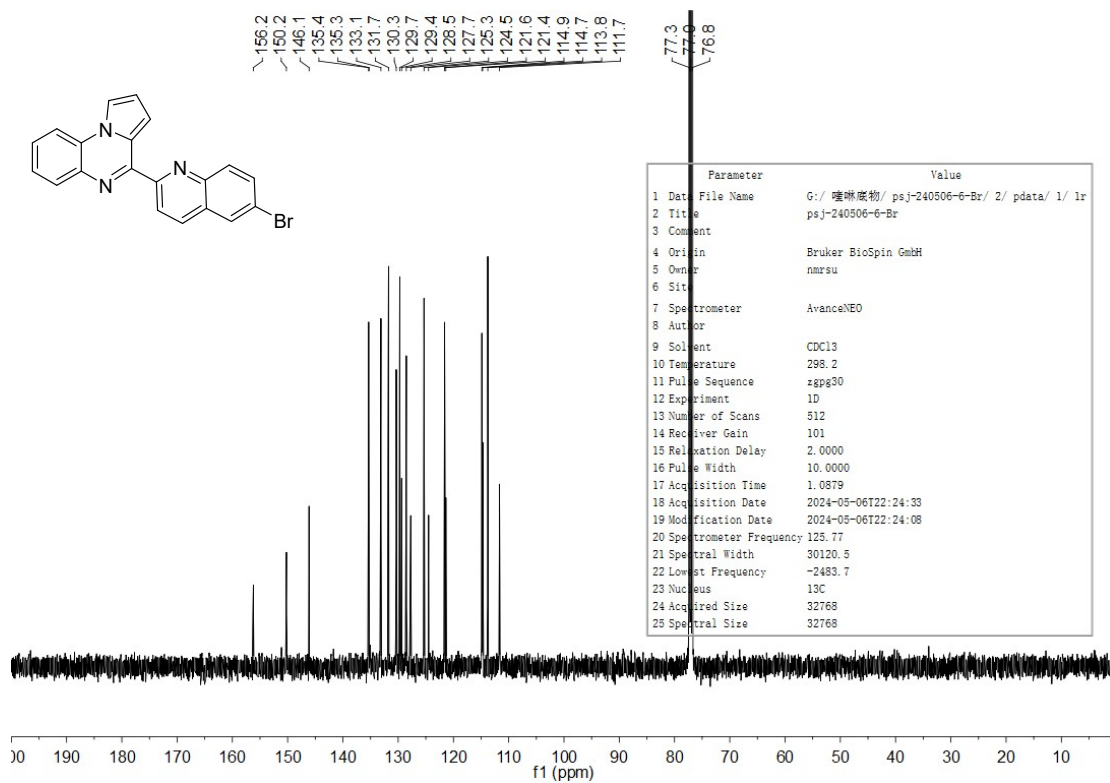

4-(6-(trifluoromethyl)quinolin-2-yl)pyrrolo[1,2-a]quinoxaline(3na)

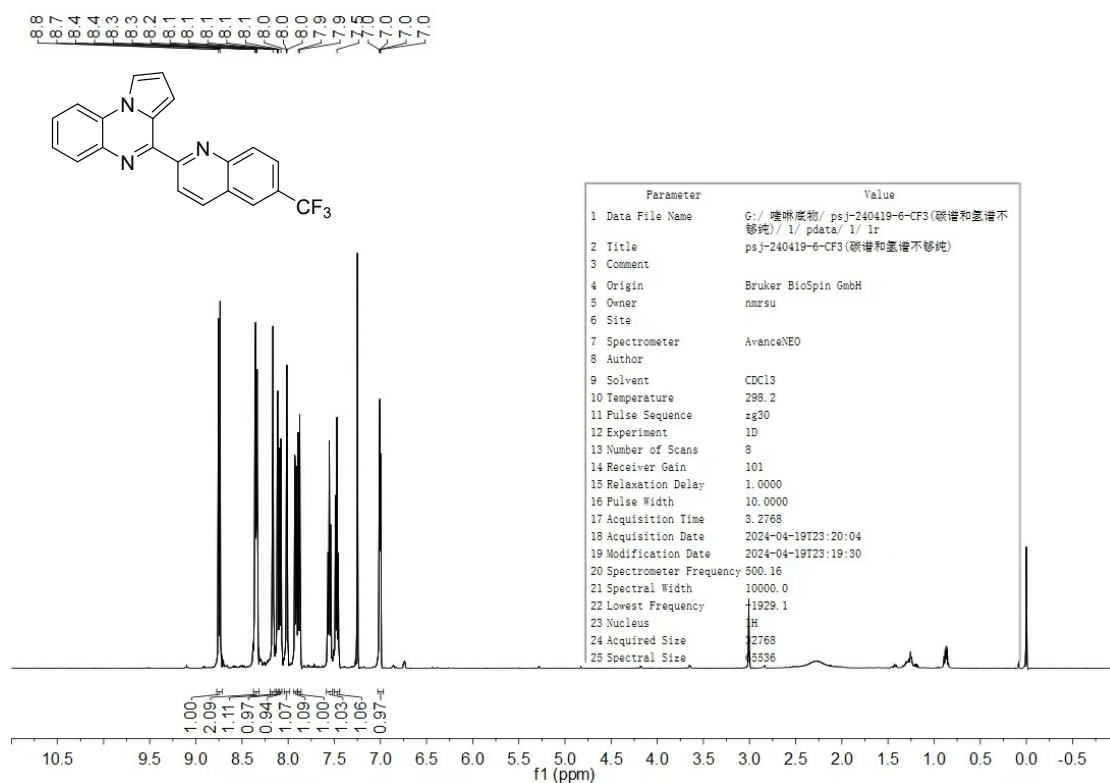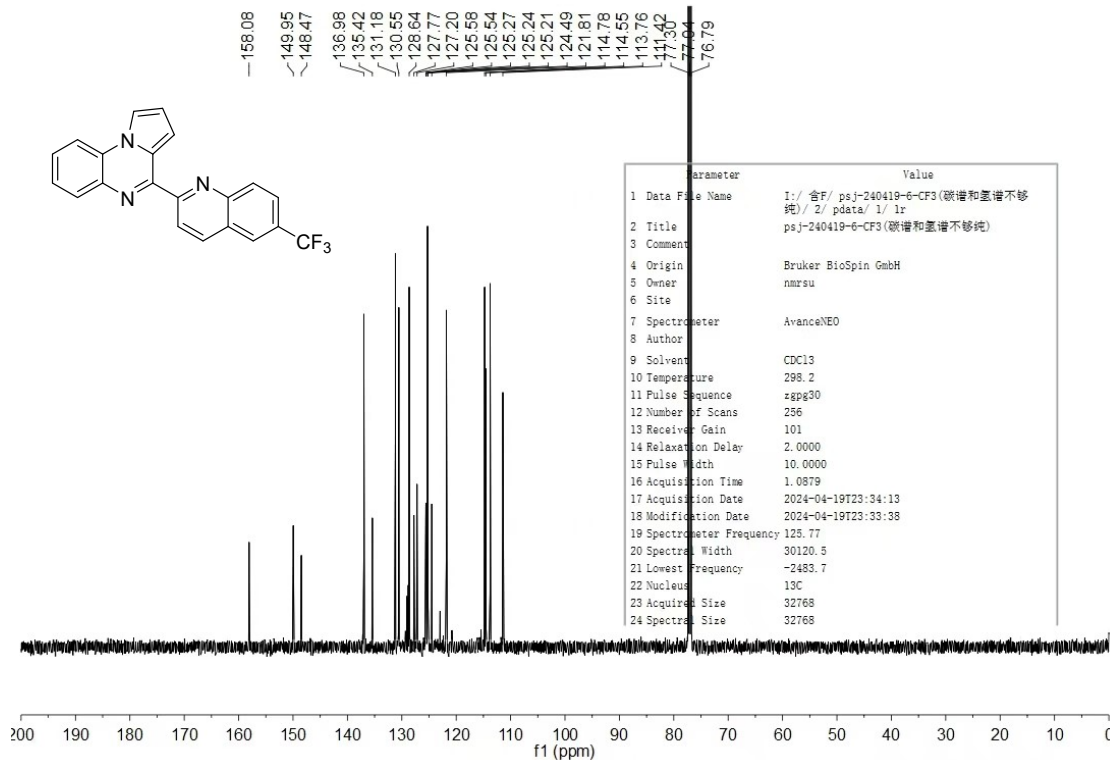



--62.11

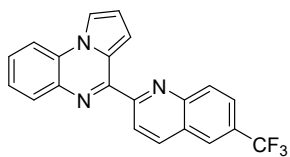

| Parameter                 | Value                                                 |
|---------------------------|-------------------------------------------------------|
| 1 Data File Name          | G:/ 喹啉废物/ psj-240419-6-CF3(磁谱和基谱不够纯)/ 3/ pdata/ 1/ 1r |
| 2 Title                   | psj-240419-6-CF3(磁谱和基谱不够纯)                            |
| 3 Comment                 |                                                       |
| 4 Origin                  | Bruker BioSpin GmbH                                   |
| 5 Owner                   | nmrsu                                                 |
| 6 Site                    |                                                       |
| 7 Spectrometer            | AvanceNEO                                             |
| 8 Author                  |                                                       |
| 9 Solvent                 | CDCl3                                                 |
| 10 Temperature            | 298.2                                                 |
| 11 Pulse Sequence         | zgig                                                  |
| 12 Experiment             | 1D                                                    |
| 13 Number of Scans        | 16                                                    |
| 14 Receiver Gain          | 101                                                   |
| 15 Relaxation Delay       | 1.0000                                                |
| 16 Pulse Width            | 15.0000                                               |
| 17 Acquisition Time       | 0.5767                                                |
| 18 Acquisition Date       | 2024-04-19T23:36:01                                   |
| 19 Modification Date      | 2024-04-19T23:35:26                                   |
| 20 Spectrometer Frequency | 470.62                                                |
| 21 Spectral Width         | 113636.4                                              |
| 22 Lowest Frequency       | -103880.2                                             |
| 23 Nucleus                | 19F                                                   |
| 24 Acquired Size          | 65536                                                 |
| 25 Spectral Size          | 65536                                                 |

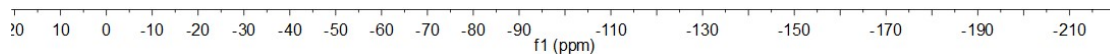

#### 4-(7-fluoroquinolin-2-yl)pyrrolo[1,2-a]quinoxaline(30a)<sup>[S3]</sup>

8.59  
8.57  
8.25  
8.24  
8.07  
8.07  
8.06  
8.06  
7.99  
7.99  
7.90  
7.90  
7.88  
7.88  
7.86  
7.85  
7.83  
7.82  
7.82  
7.80  
7.54  
7.53  
7.52  
7.51  
7.50  
7.47  
7.47  
7.45  
7.44  
7.44  
7.38  
7.38  
7.36  
7.36  
7.35  
7.34  
7.00  
6.99  
6.98

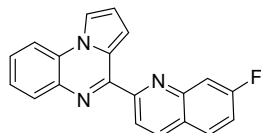

| Parameter                 | Value                                     |
|---------------------------|-------------------------------------------|
| 1 Data File Name          | G:/ 喹啉废物/ psj-240506-7-F/ 1/ pdata/ 1/ 1r |
| 2 Title                   | psj-240506-7-F                            |
| 3 Comment                 |                                           |
| 4 Origin                  | Bruker BioSpin GmbH                       |
| 5 Owner                   | nmrsu                                     |
| 6 Site                    |                                           |
| 7 Spectrometer            | AvanceNEO                                 |
| 8 Author                  |                                           |
| 9 Solvent                 | CDCl3                                     |
| 10 Temperature            | 298.1                                     |
| 11 Pulse Sequence         | zg30                                      |
| 12 Experiment             | 1D                                        |
| 13 Number of Scans        | 8                                         |
| 14 Receiver Gain          | 101                                       |
| 15 Relaxation Delay       | 1.0000                                    |
| 16 Pulse Width            | 10.0000                                   |
| 17 Acquisition Time       | 3.2768                                    |
| 18 Acquisition Date       | 2024-05-06T21:37:30                       |
| 19 Modification Date      | 2024-05-06T21:37:06                       |
| 20 Spectrometer Frequency | 500.16                                    |
| 21 Spectral Width         | 10000.0                                   |
| 22 Lowest Frequency       | -1924.0                                   |
| 23 Nucleus                | 1H                                        |
| 24 Acquired Size          | 32768                                     |
| 25 Spectral Size          | 65536                                     |

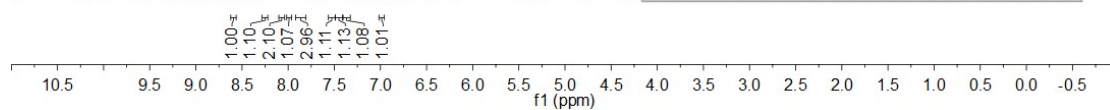

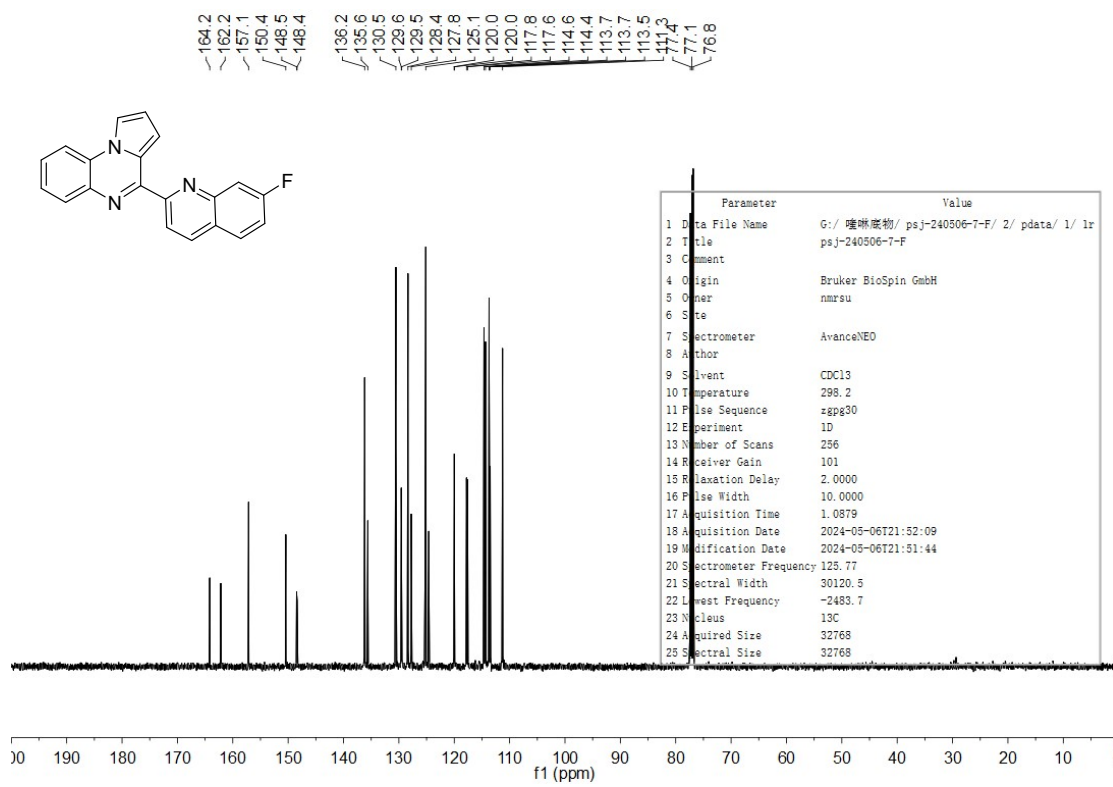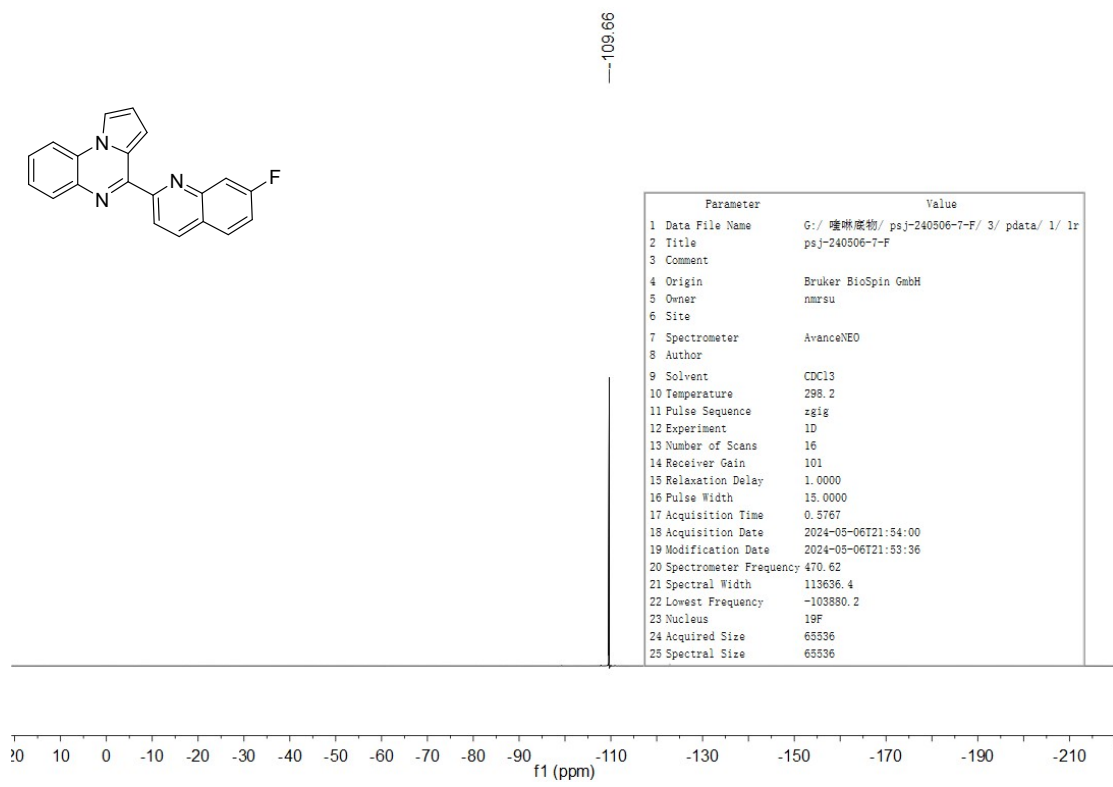

4-(7-chloroquinolin-2-yl)pyrrolo[1,2-a]quinoxaline(3pa)

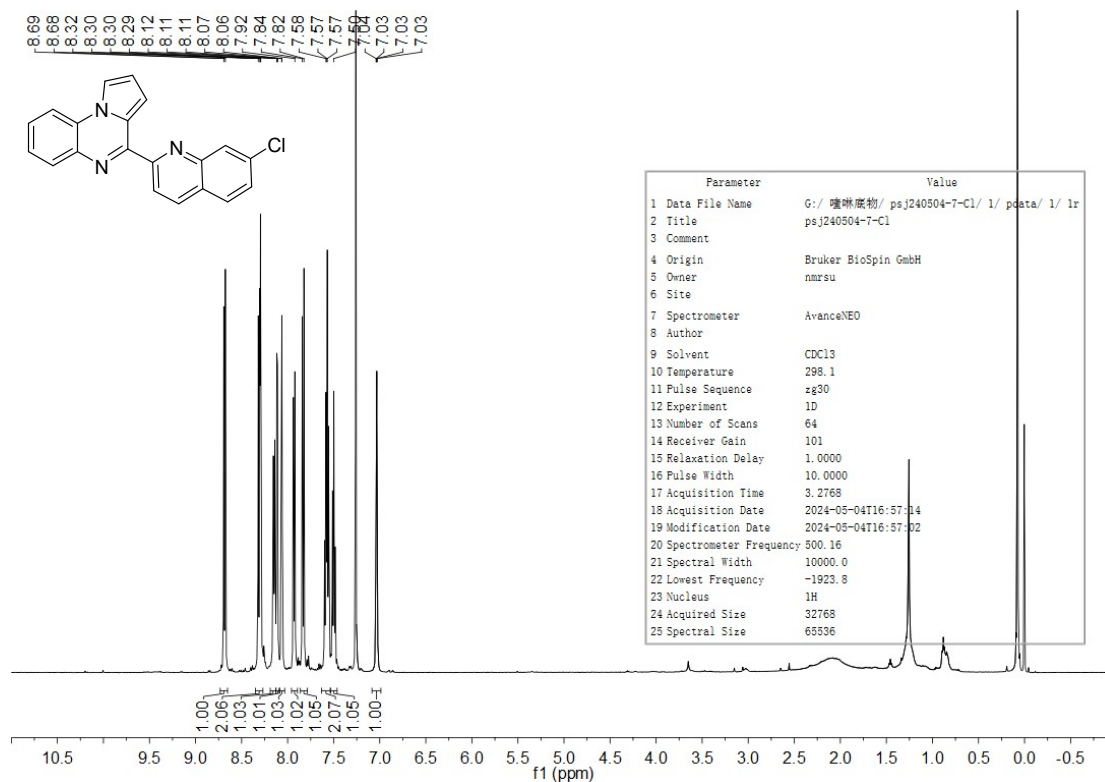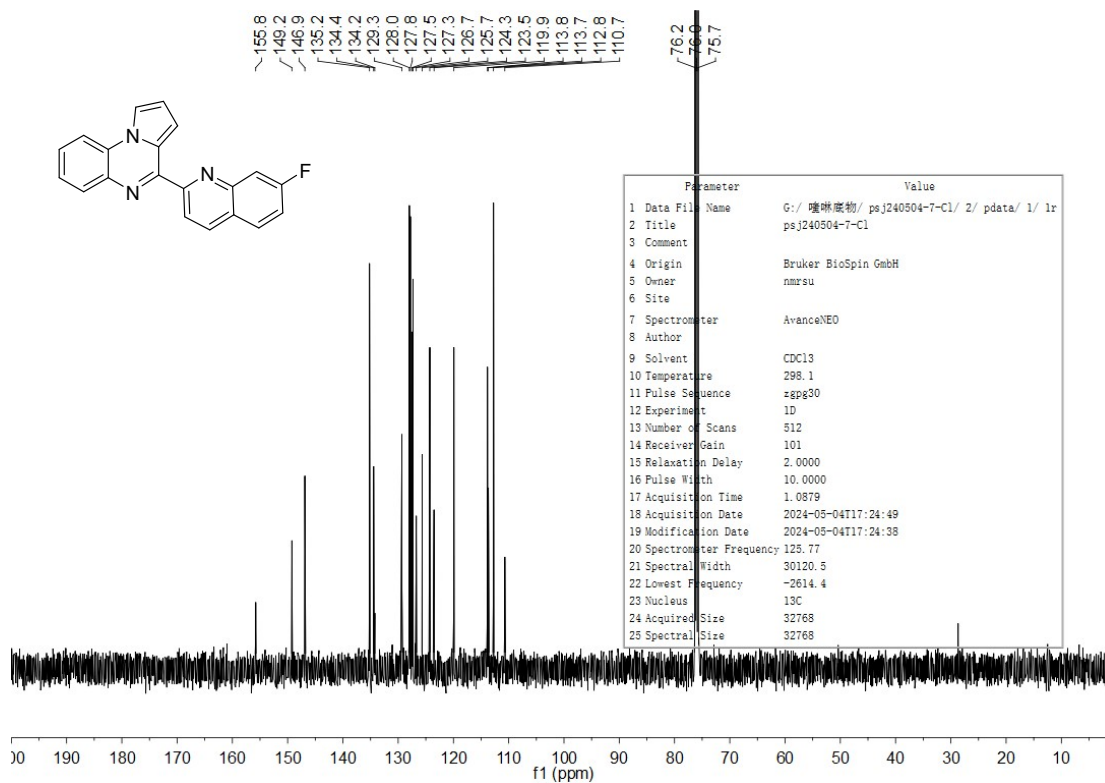

4-(7-bromoquinolin-2-yl)pyrrolo[1,2-a]quinoxaline(3qa)

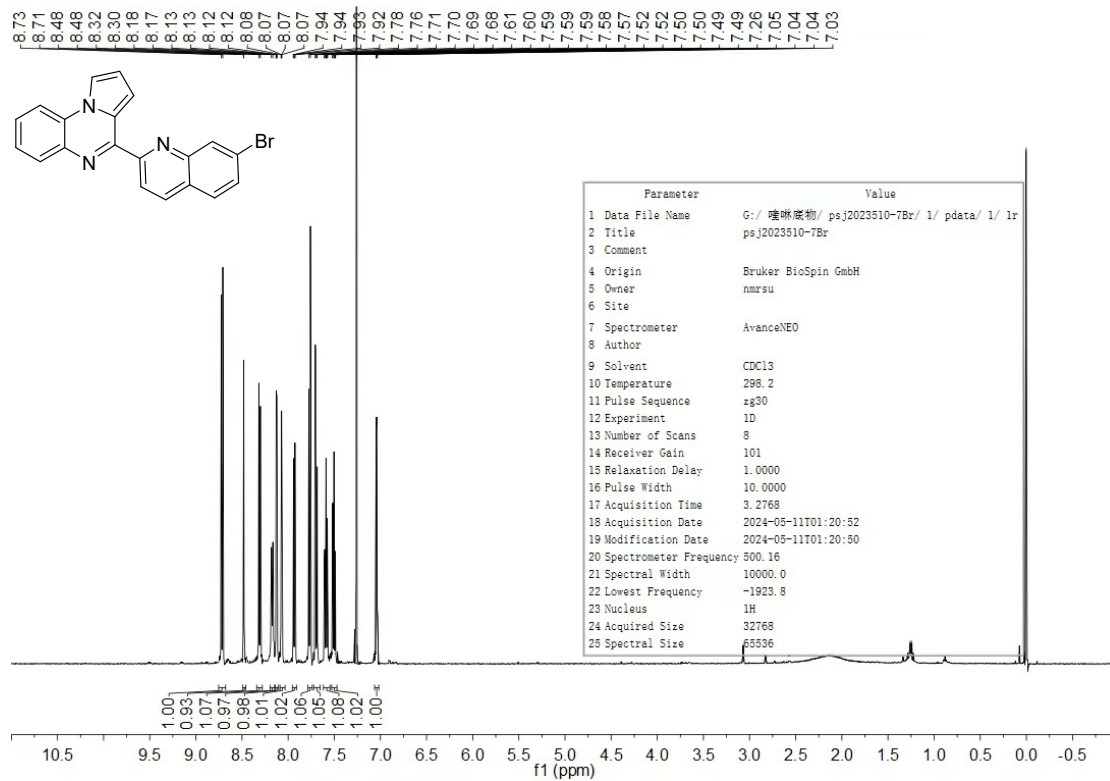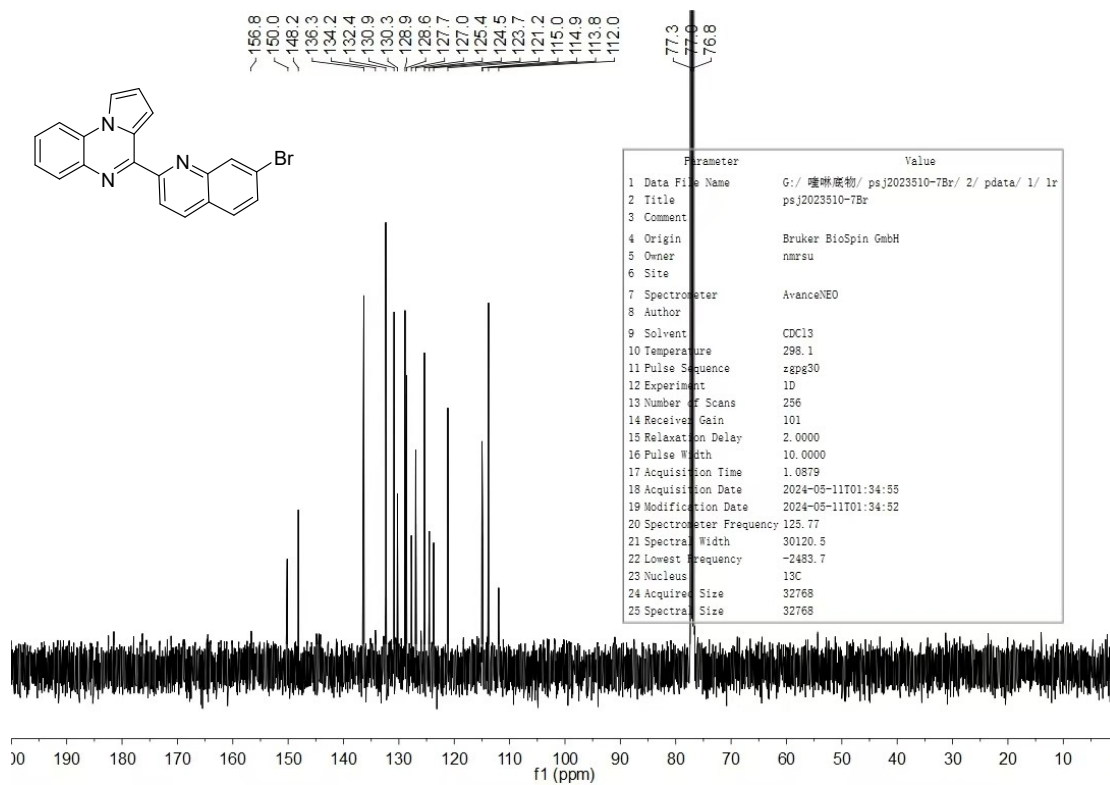

### 4-(8-fluoroquinolin-2-yl)pyrrolo[1,2-a]quinoxaline(3ra)

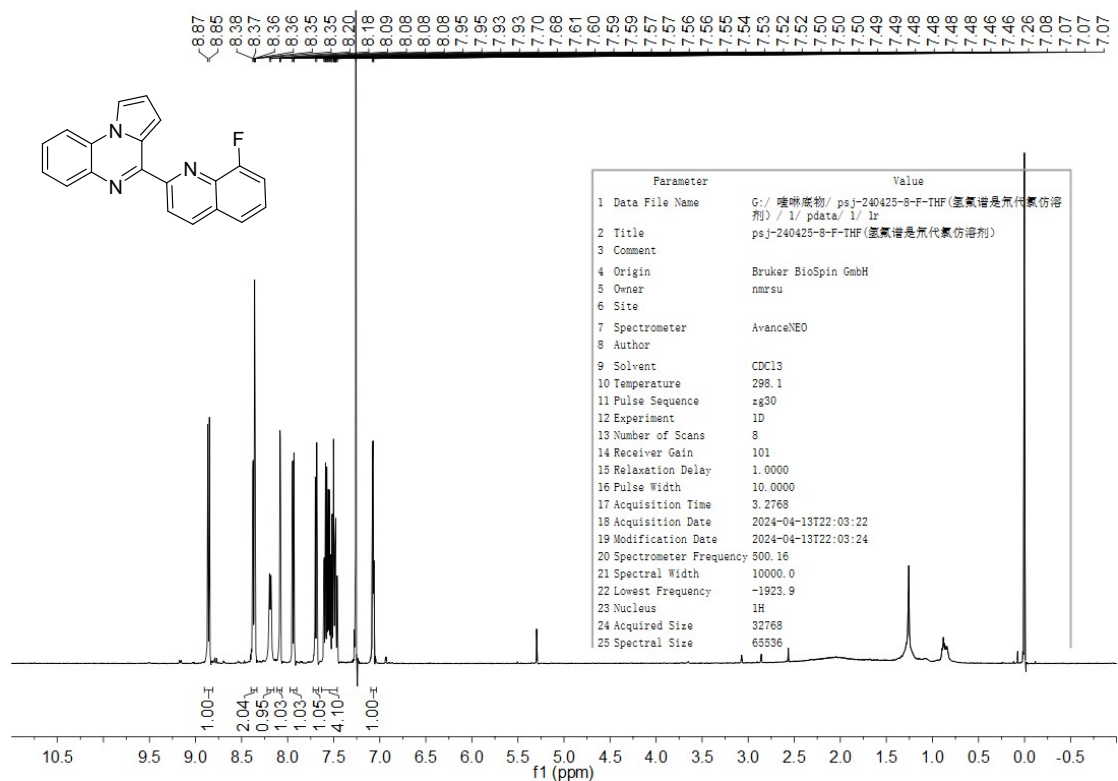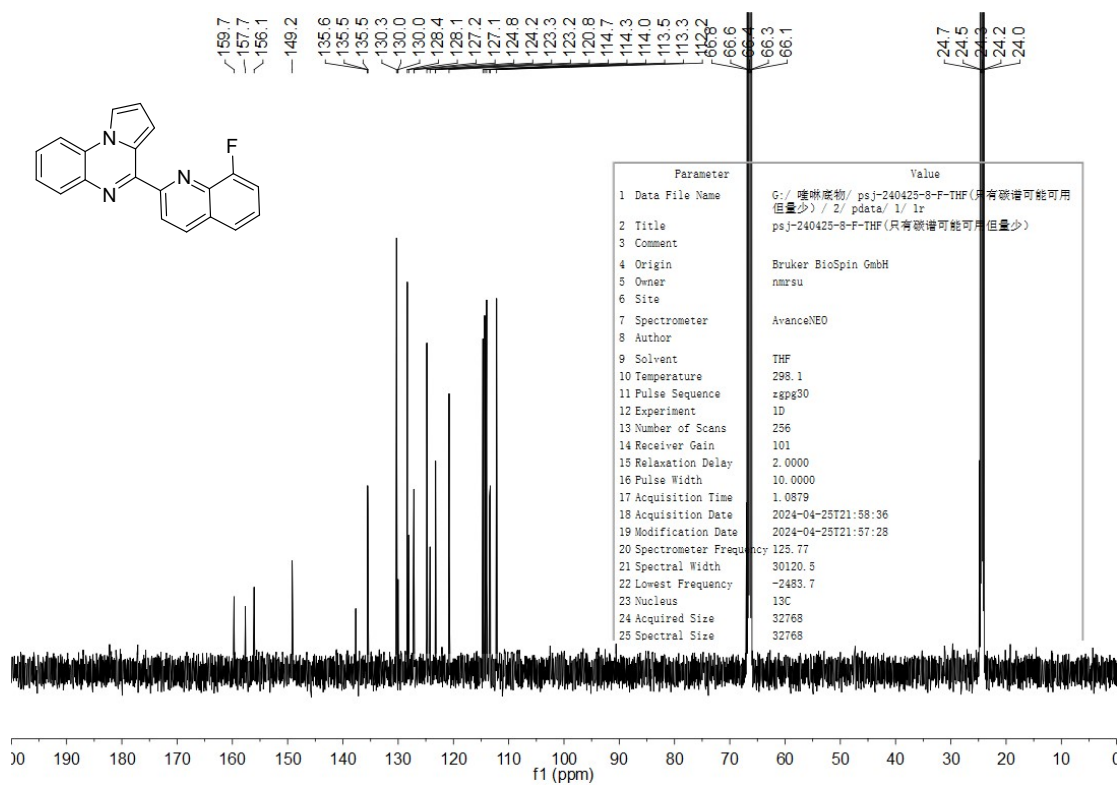

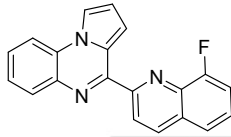

| Parameter                 | Value                                                       |
|---------------------------|-------------------------------------------------------------|
| 1 Data File Name          | G:/ 喹啉底物/ psj-240425-8-F-THF (氢氟酸是氘代氯仿溶剂) / 3/ pdata/ 1/ 1r |
| 2 Title                   | psj-240425-8-F-THF (氢氟酸是氘代氯仿溶剂)                             |
| 3 Comment                 |                                                             |
| 4 Origin                  | Bruker BioSpin GmbH                                         |
| 5 Owner                   | nmrsu                                                       |
| 6 Site                    |                                                             |
| 7 Spectrometer            | AvanceNEO                                                   |
| 8 Author                  |                                                             |
| 9 Solvent                 | CDCl3                                                       |
| 10 Temperature            | 298.2                                                       |
| 11 Pulse Sequence         | zgig                                                        |
| 12 Experiment             | 1D                                                          |
| 13 Number of Scans        | 16                                                          |
| 14 Receiver Gain          | 101                                                         |
| 15 Relaxation Delay       | 1.0000                                                      |
| 16 Pulse Width            | 15.0000                                                     |
| 17 Acquisition Time       | 0.5767                                                      |
| 18 Acquisition Date       | 2024-04-13T22:20:16                                         |
| 19 Modification Date      | 2024-04-13T22:20:18                                         |
| 20 Spectrometer Frequency | 470.62                                                      |
| 21 Spectral Width         | 113636.4                                                    |
| 22 Lowest Frequency       | -103980.2                                                   |
| 23 Nucleus                | 19F                                                         |
| 24 Acquired Size          | 65536                                                       |
| 25 Spectral Size          | 65536                                                       |

---124.26

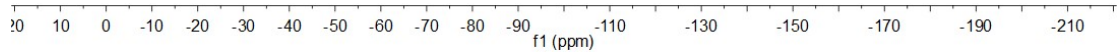

### 8-methoxy-4-(quinolin-2-yl)pyrrolo[1,2-a]quinoxaline(3ab)<sup>[S4]</sup>

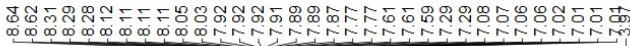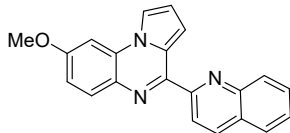

| Parameter                 | Value                                              |
|---------------------------|----------------------------------------------------|
| 1 Data File Name          | G:/ 吡咯底物/ psj-24-0413-biluo-4-OMe/ 1/ pdata/ 1/ 1r |
| 2 Title                   | psj-24-0413-biluo-4-OMe                            |
| 3 Comment                 |                                                    |
| 4 Origin                  | Bruker BioSpin GmbH                                |
| 5 Owner                   | nmrsu                                              |
| 6 Site                    |                                                    |
| 7 Spectrometer            | AvanceNEO                                          |
| 8 Author                  |                                                    |
| 9 Solvent                 | CDCl3                                              |
| 10 Temperature            | 298.1                                              |
| 11 Pulse Sequence         | zg30                                               |
| 12 Experiment             | 1D                                                 |
| 13 Number of Scans        | 8                                                  |
| 14 Receiver Gain          | 101                                                |
| 15 Relaxation Delay       | 1.0000                                             |
| 16 Pulse Width            | 10.0000                                            |
| 17 Acquisition Time       | 3.2768                                             |
| 18 Acquisition Date       | 2024-04-13T22:44:50                                |
| 19 Modification Date      | 2024-04-13T22:44:52                                |
| 20 Spectrometer Frequency | 500.16                                             |
| 21 Spectral Width         | 10000.0                                            |
| 22 Lowest Frequency       | -1924.0                                            |
| 23 Nucleus                | 1H                                                 |
| 24 Acquired Size          | 32768                                              |
| 25 Spectral Size          | 65536                                              |

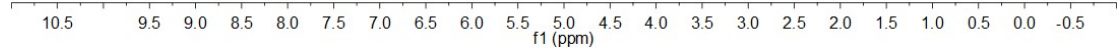

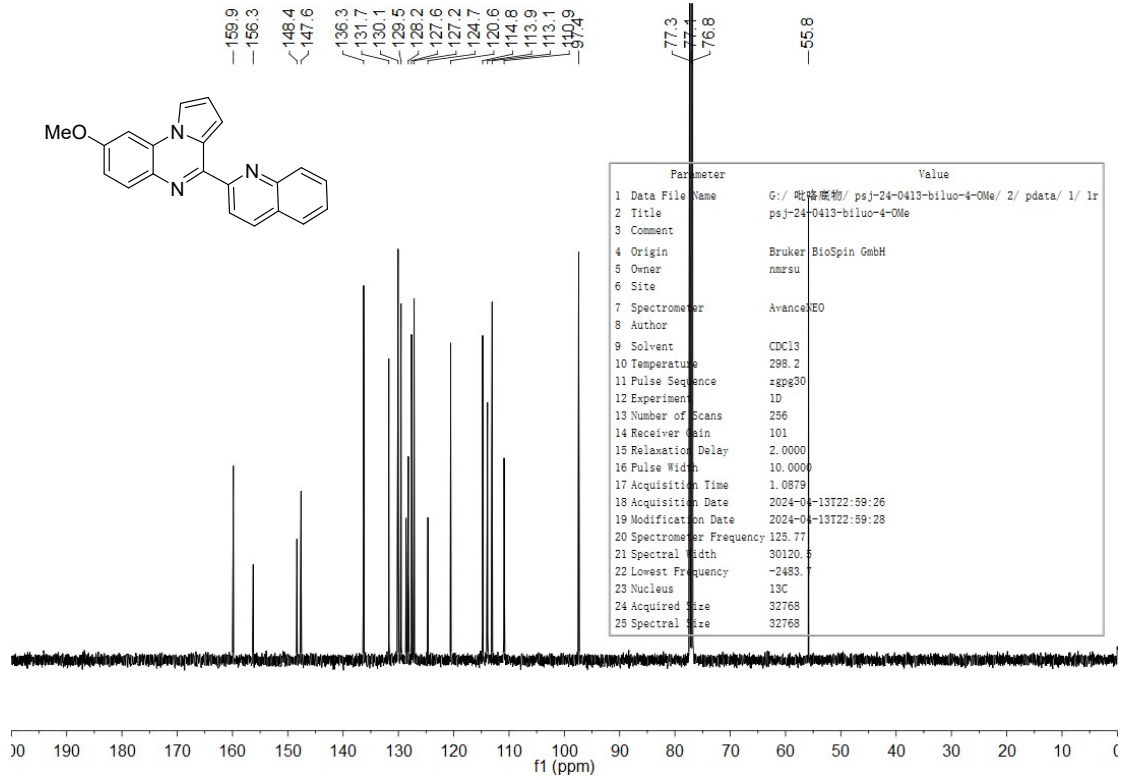

**8-methyl-4-(quinolin-2-yl)pyrrolo[1,2-a]quinoxaline(3ac)**

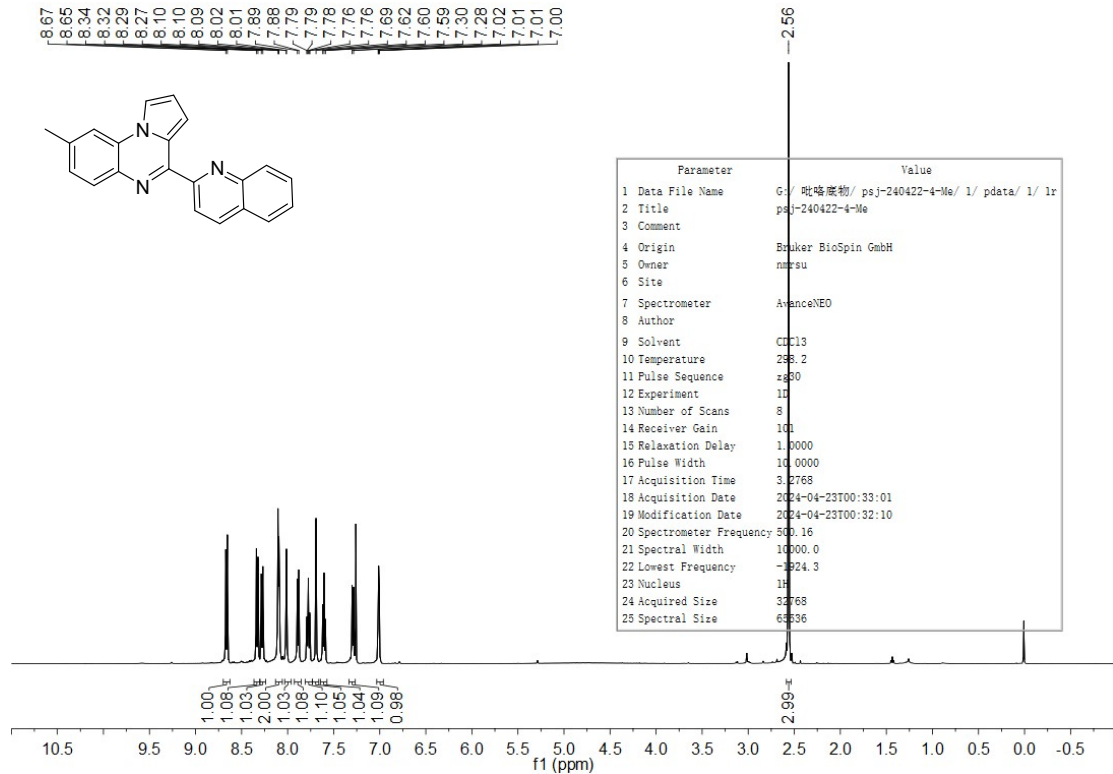

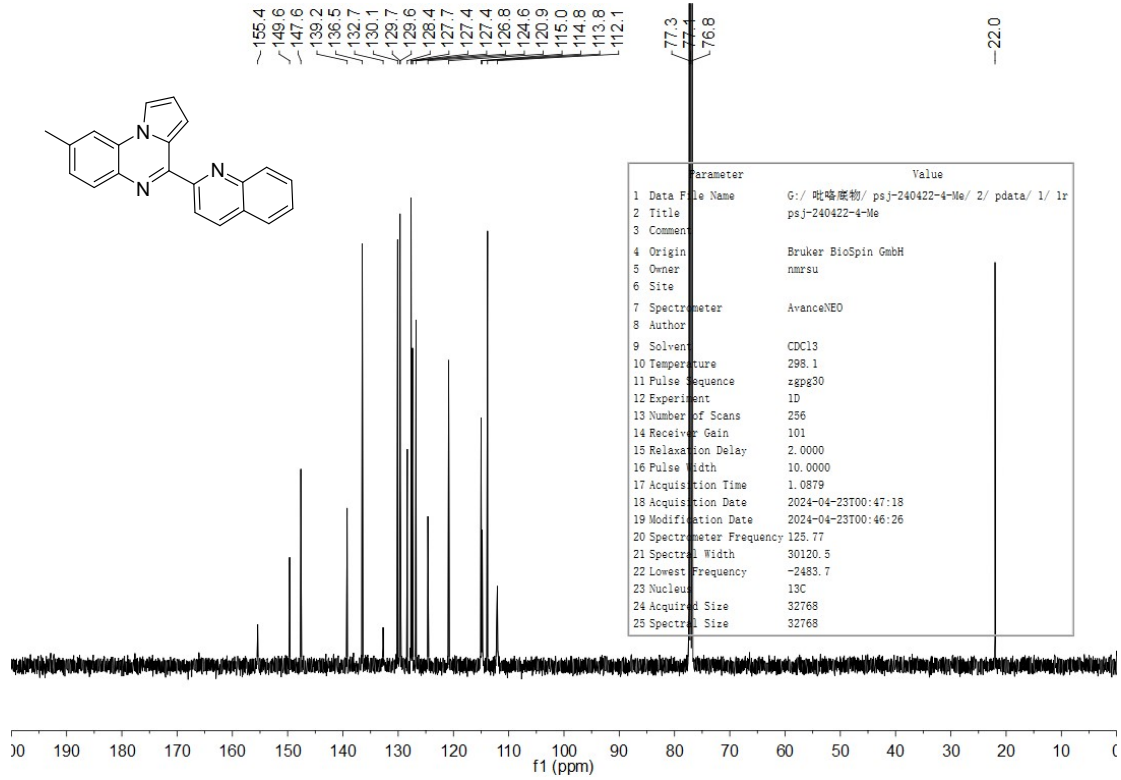

**8-fluoro-4-(quinolin-2-yl)pyrrolo[1,2-a]quinoxaline(3ad)S4I**

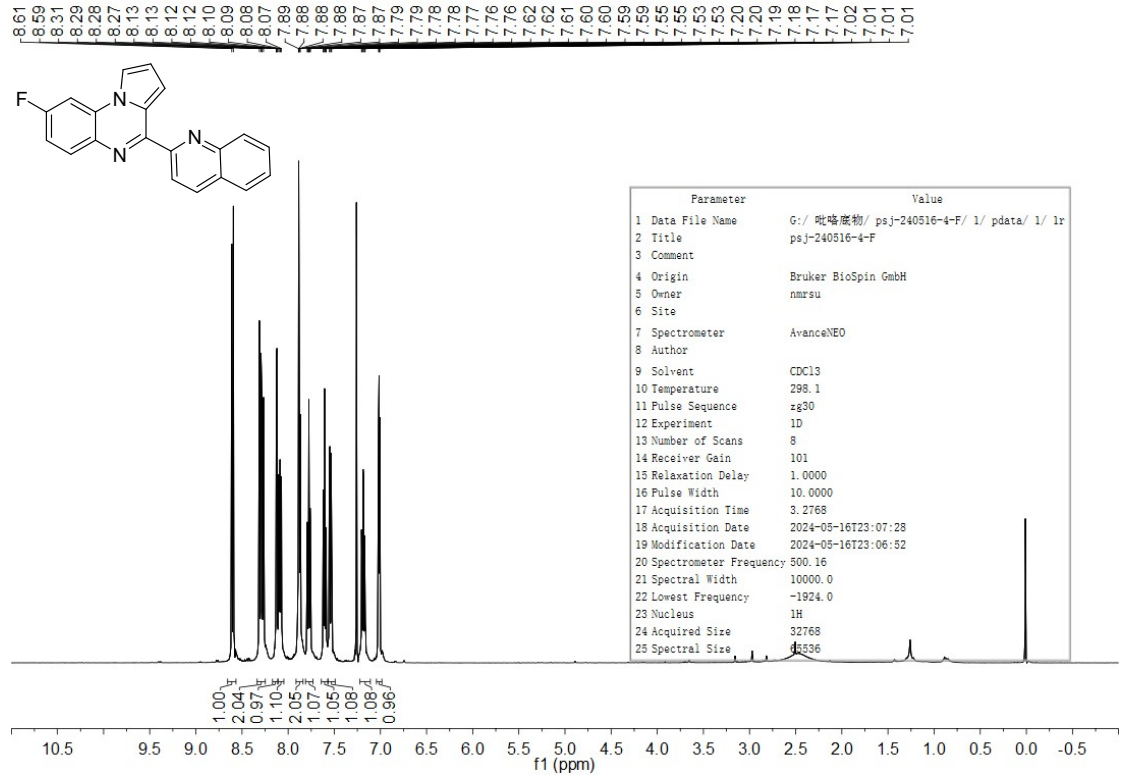



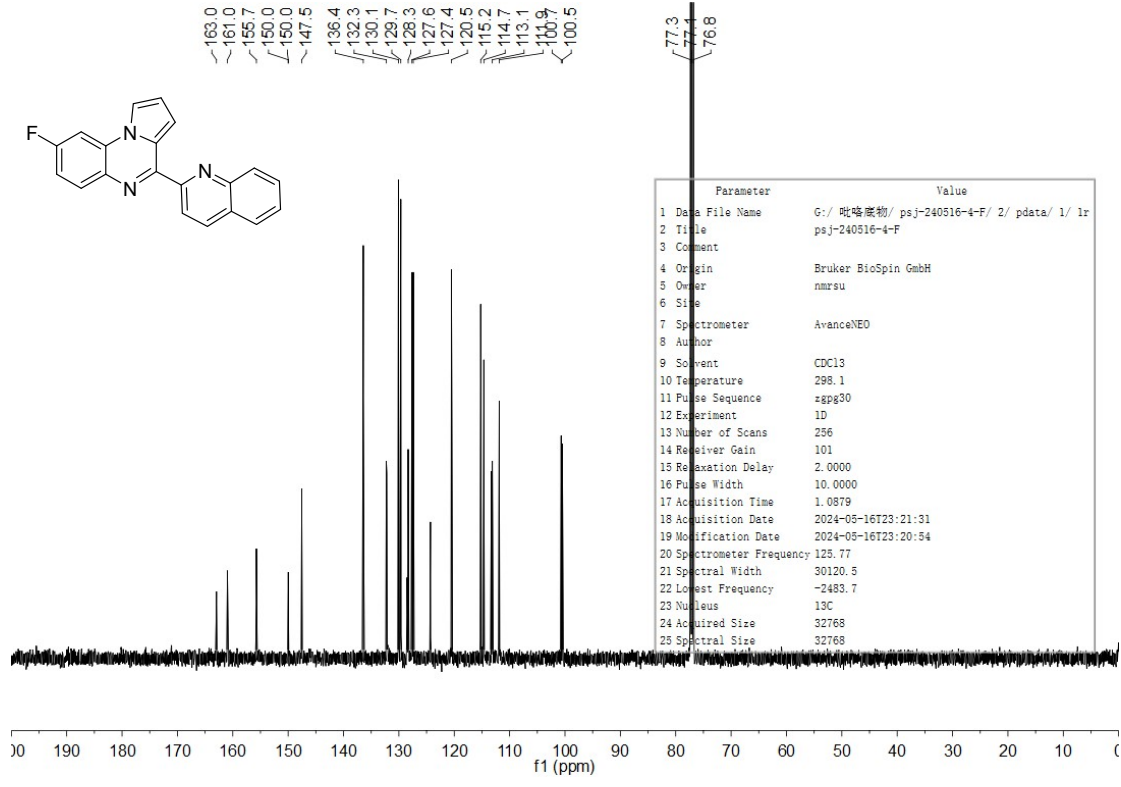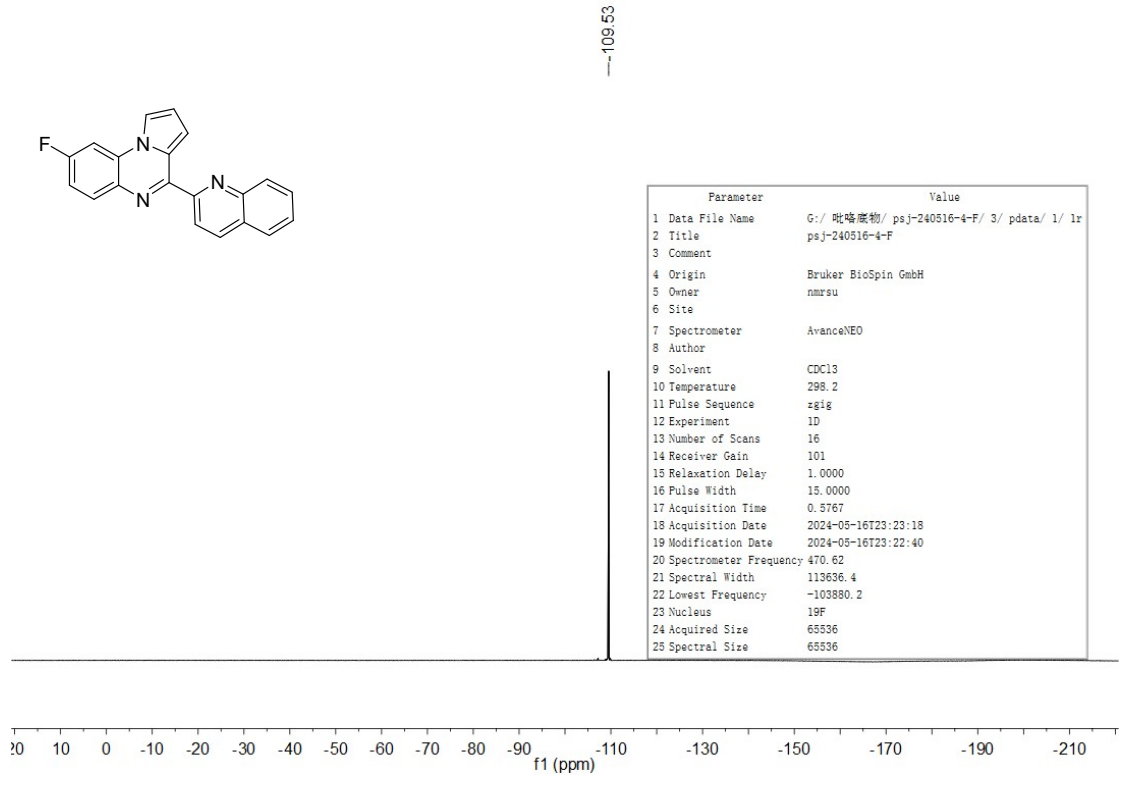

### 8-chloro-4-(quinolin-2-yl)pyrrolo[1,2-a]quinoxaline(3ae)

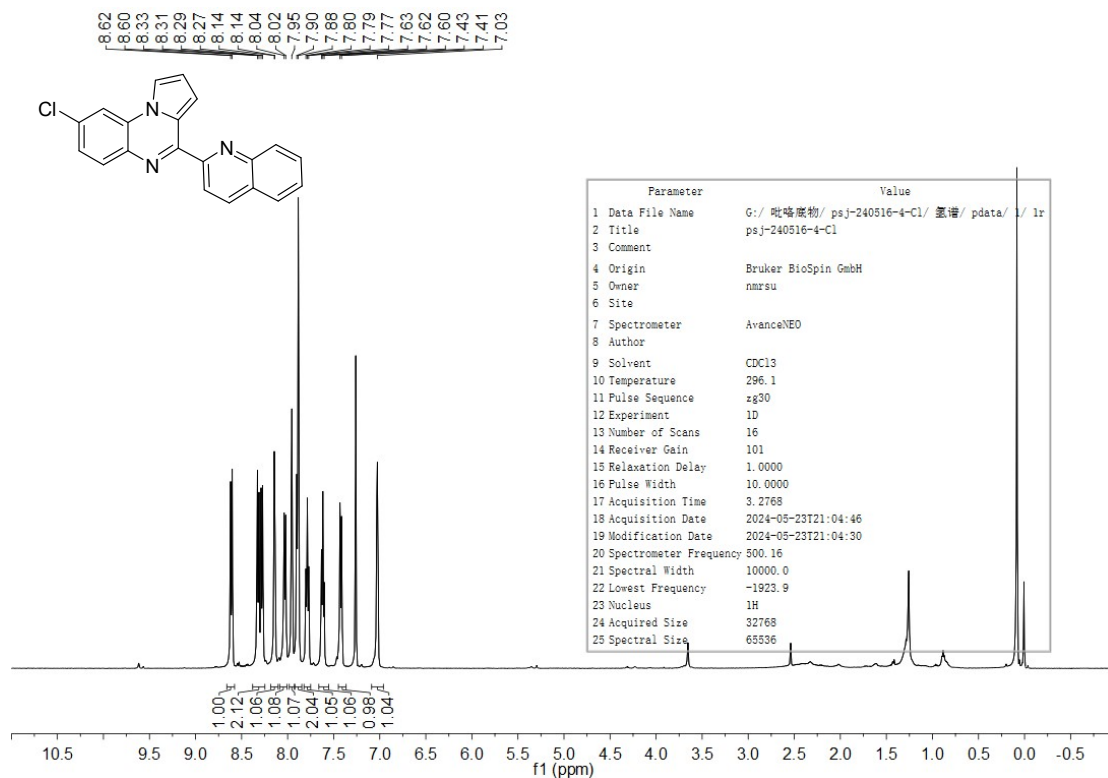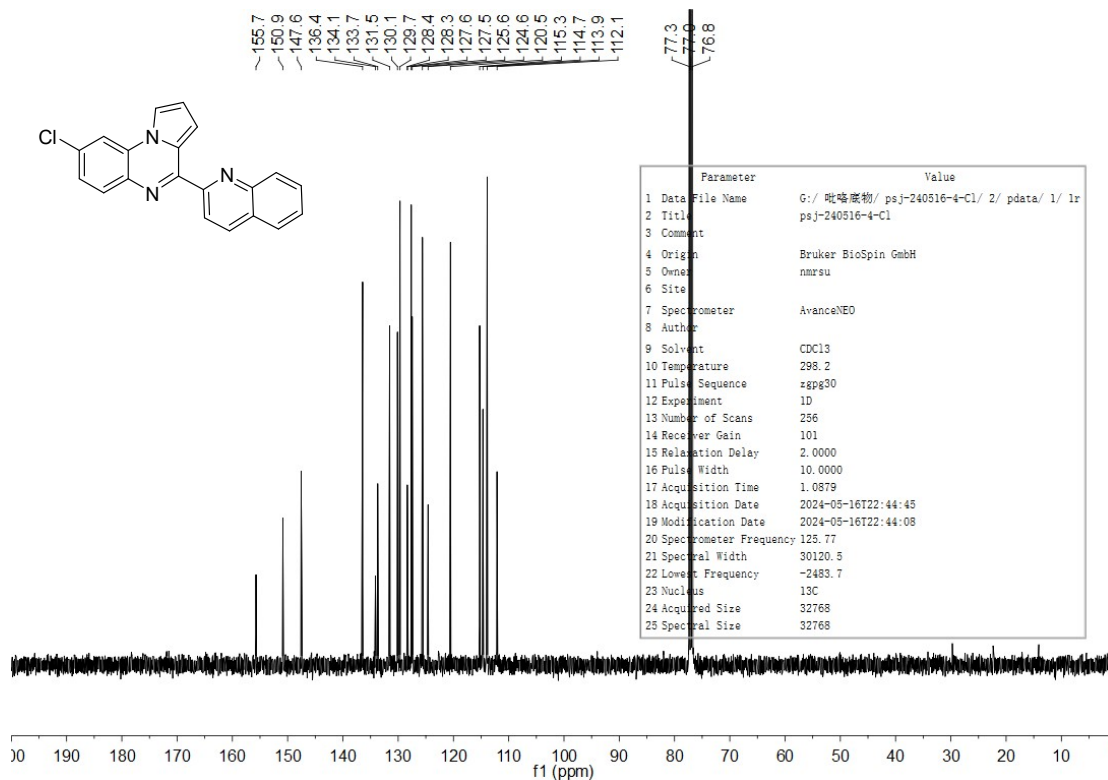

**7-methoxy-4-(quinolin-2-yl)pyrrolo[1,2-a]quinoxaline(3af)**

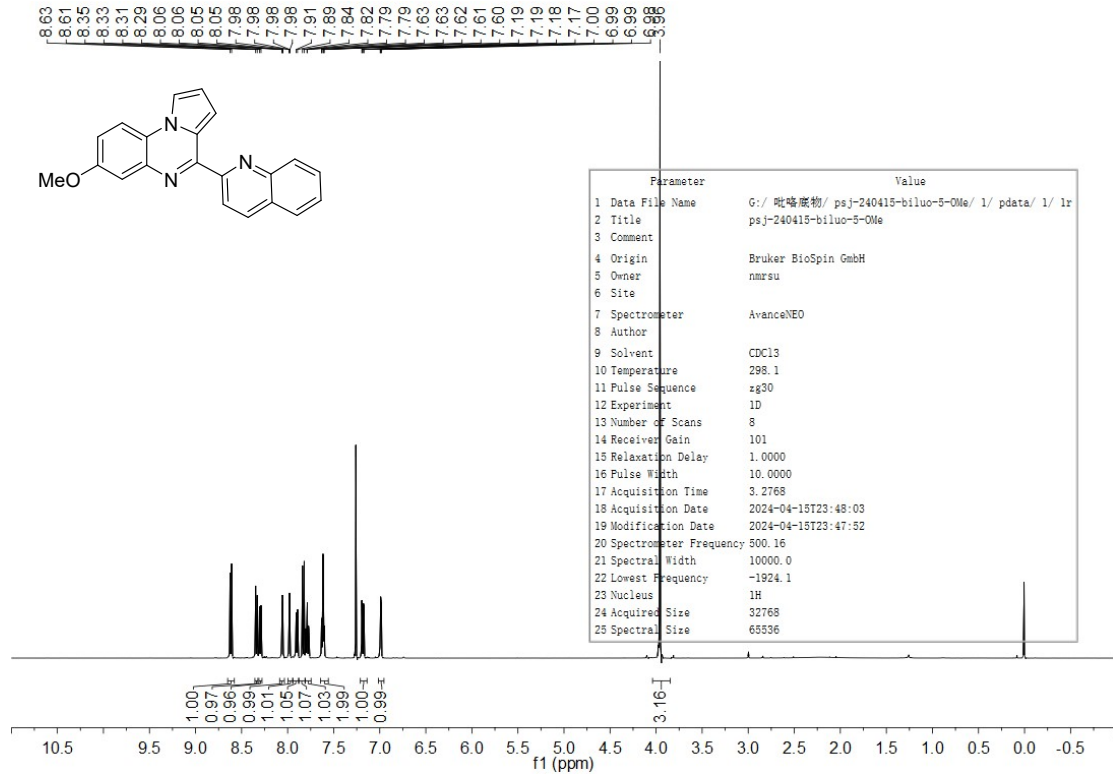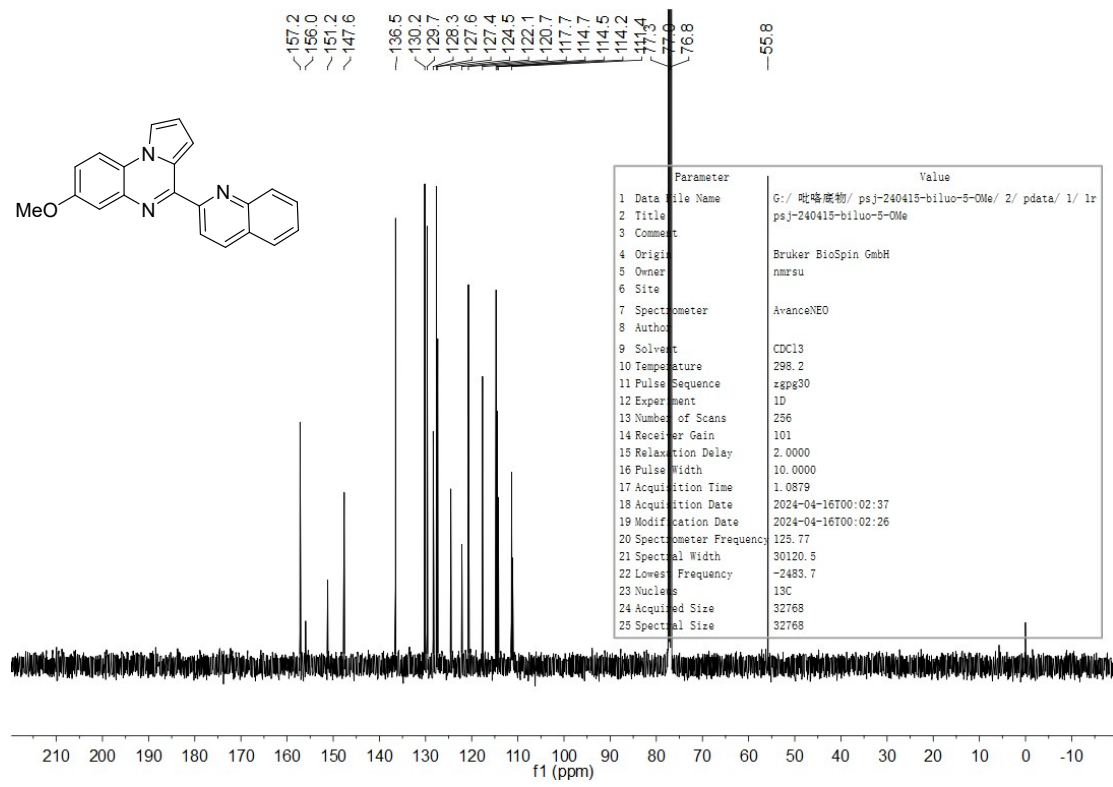

**7-methyl-4-(quinolin-2-yl)pyrrolo[1,2-a]quinoxaline(3ag)<sup>[S4]</sup>**

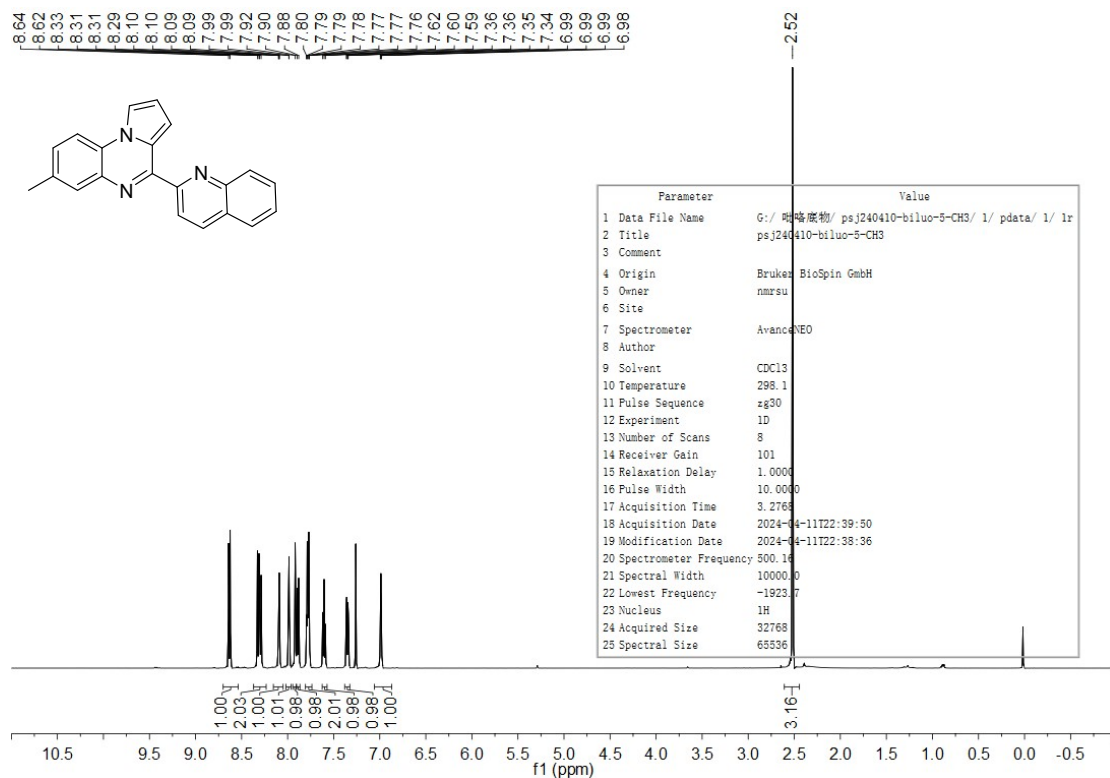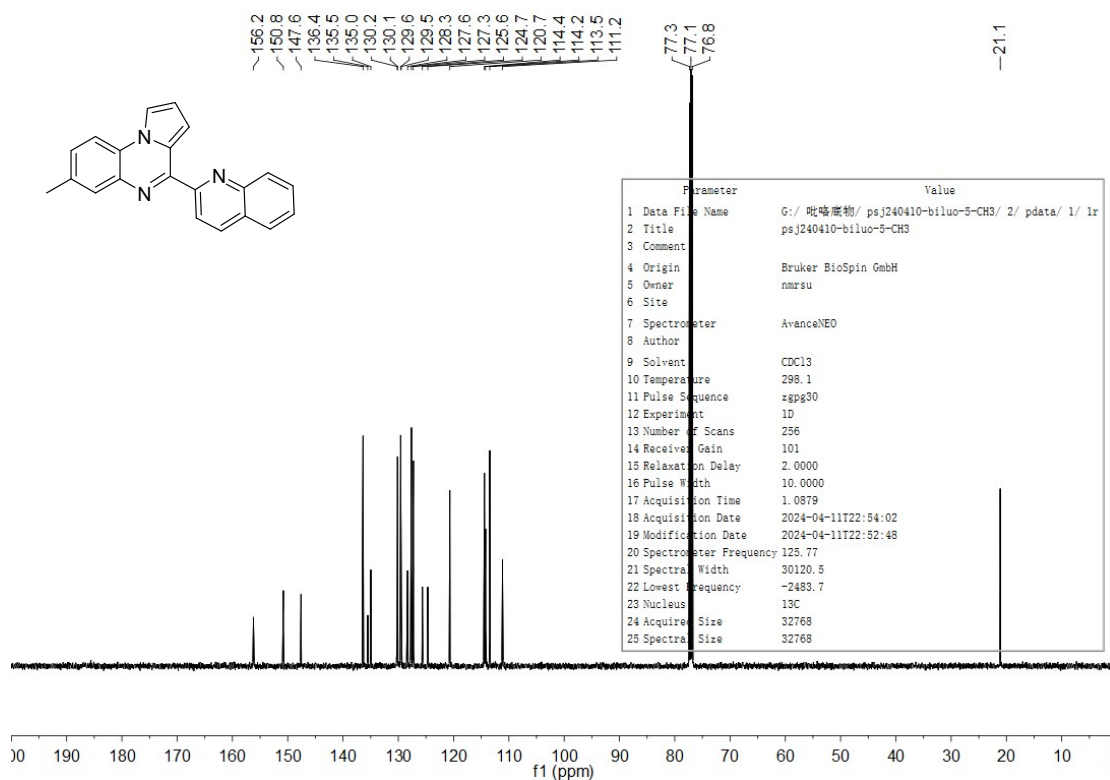

**7-fluoro-4-(quinolin-2-yl)pyrrolo[1,2-a]quinoxaline(3ah)**

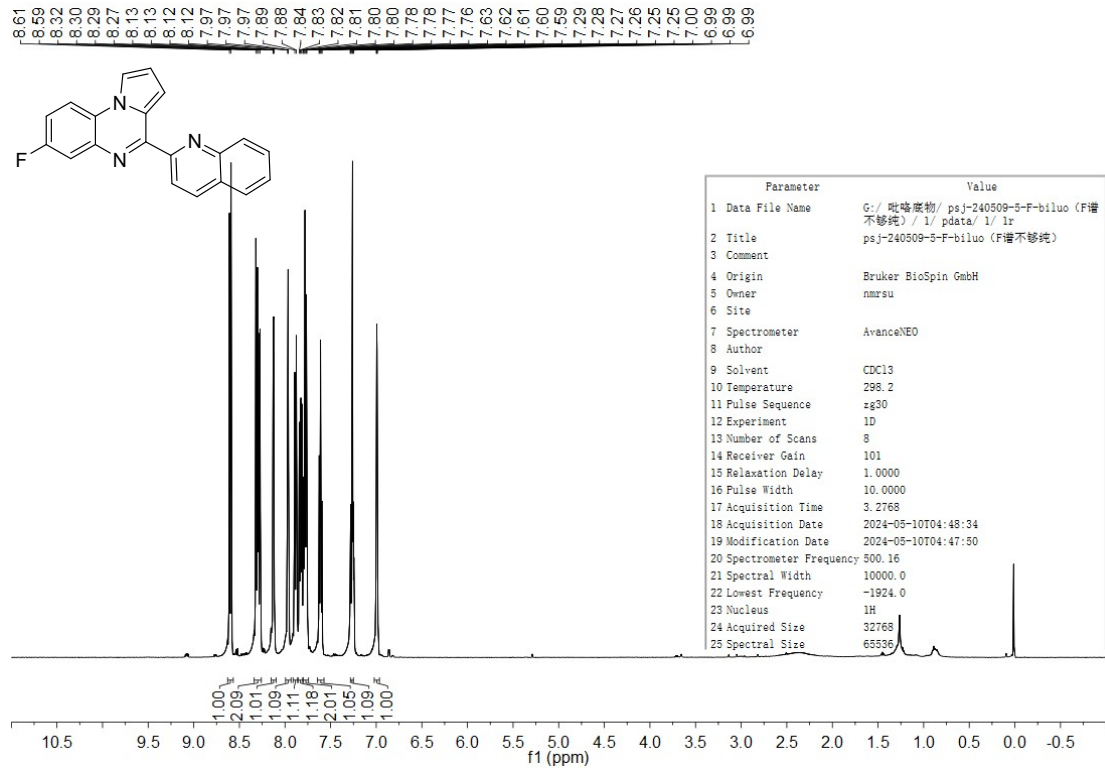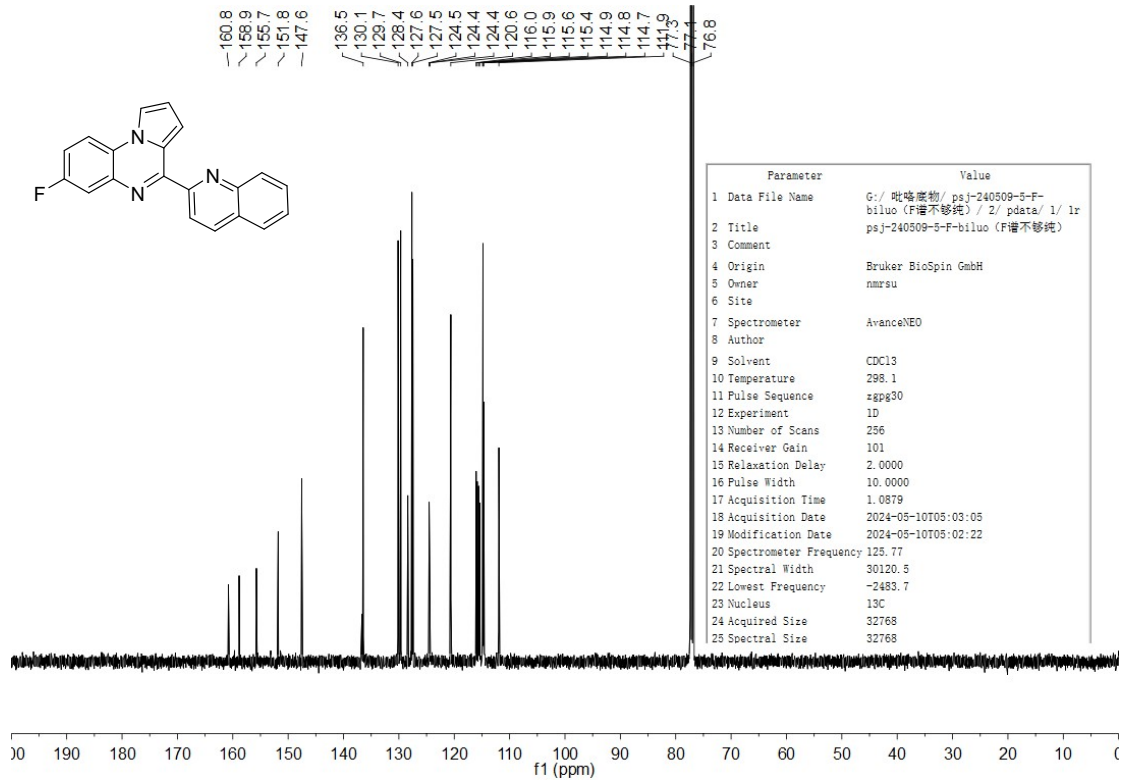

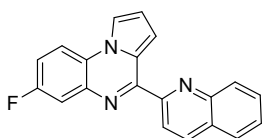

116.83

| Parameter                 | Value                                     |
|---------------------------|-------------------------------------------|
| 1 Data File Name          | G:/ 吡咯底物/ psj-240604-5-f/ 1/ pdata/ 1/ 1r |
| 2 Title                   | psj-240604-5-f                            |
| 3 Comment                 |                                           |
| 4 Origin                  | Bruker BioSpin GmbH                       |
| 5 Owner                   | nmsu                                      |
| 6 Site                    |                                           |
| 7 Spectrometer            | AvanceNEO                                 |
| 8 Author                  |                                           |
| 9 Solvent                 | CDCl3                                     |
| 10 Temperature            | 297.8                                     |
| 11 Pulse Sequence         | zgig                                      |
| 12 Experiment             | 1D                                        |
| 13 Number of Scans        | 16                                        |
| 14 Receiver Gain          | 101                                       |
| 15 Relaxation Delay       | 1.0000                                    |
| 16 Pulse Width            | 15.0000                                   |
| 17 Acquisition Time       | 0.5767                                    |
| 18 Acquisition Date       | 2024-06-05T06:15:01                       |
| 19 Modification Date      | 2024-06-05T06:14:58                       |
| 20 Spectrometer Frequency | 470.62                                    |
| 21 Spectral Width         | 113636.4                                  |
| 22 Lowest Frequency       | -103880.2                                 |
| 23 Nucleus                | 19F                                       |
| 24 Acquired Size          | 65536                                     |
| 25 Spectral Size          | 65536                                     |

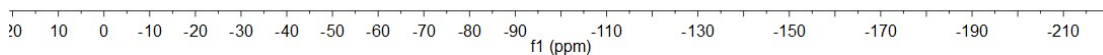

7-chloro-4-(quinolin-2-yl)pyrrolo[1,2-a]quinoxaline(3ai)

8.6  
8.6  
8.3  
8.3  
8.1  
8.1  
8.1  
8.1  
8.0  
8.0  
8.0  
8.0  
7.8  
7.8  
7.6  
7.6  
7.5  
7.5  
7.0  
7.0

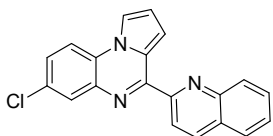

| Parameter                 | Value                                            |
|---------------------------|--------------------------------------------------|
| 1 Data File Name          | G:/ 吡咯底物/ psj-240513-5-Cl-biluo/ 3/ pdata/ 1/ 1r |
| 2 Title                   | psj-240513-5-Cl-biluo                            |
| 3 Comment                 |                                                  |
| 4 Origin                  | Bruker BioSpin GmbH                              |
| 5 Owner                   | nmsu                                             |
| 6 Site                    |                                                  |
| 7 Spectrometer            | AvanceNEO                                        |
| 8 Author                  |                                                  |
| 9 Solvent                 | CDCl3                                            |
| 10 Temperature            | 298.1                                            |
| 11 Pulse Sequence         | zg30                                             |
| 12 Experiment             | 1D                                               |
| 13 Number of Scans        | 8                                                |
| 14 Receiver Gain          | 32                                               |
| 15 Relaxation Delay       | 1.0000                                           |
| 16 Pulse Width            | 10.0000                                          |
| 17 Acquisition Time       | 3.2768                                           |
| 18 Acquisition Date       | 2024-05-14T00:07:40                              |
| 19 Modification Date      | 2024-05-14T00:07:20                              |
| 20 Spectrometer Frequency | 500.16                                           |
| 21 Spectral Width         | 10000.0                                          |
| 22 Lowest Frequency       | -1924.1                                          |
| 23 Nucleus                | 1H                                               |
| 24 Acquired Size          | 32768                                            |
| 25 Spectral Size          | 65536                                            |

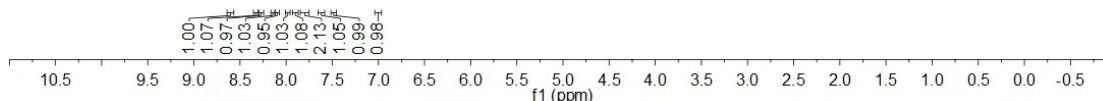

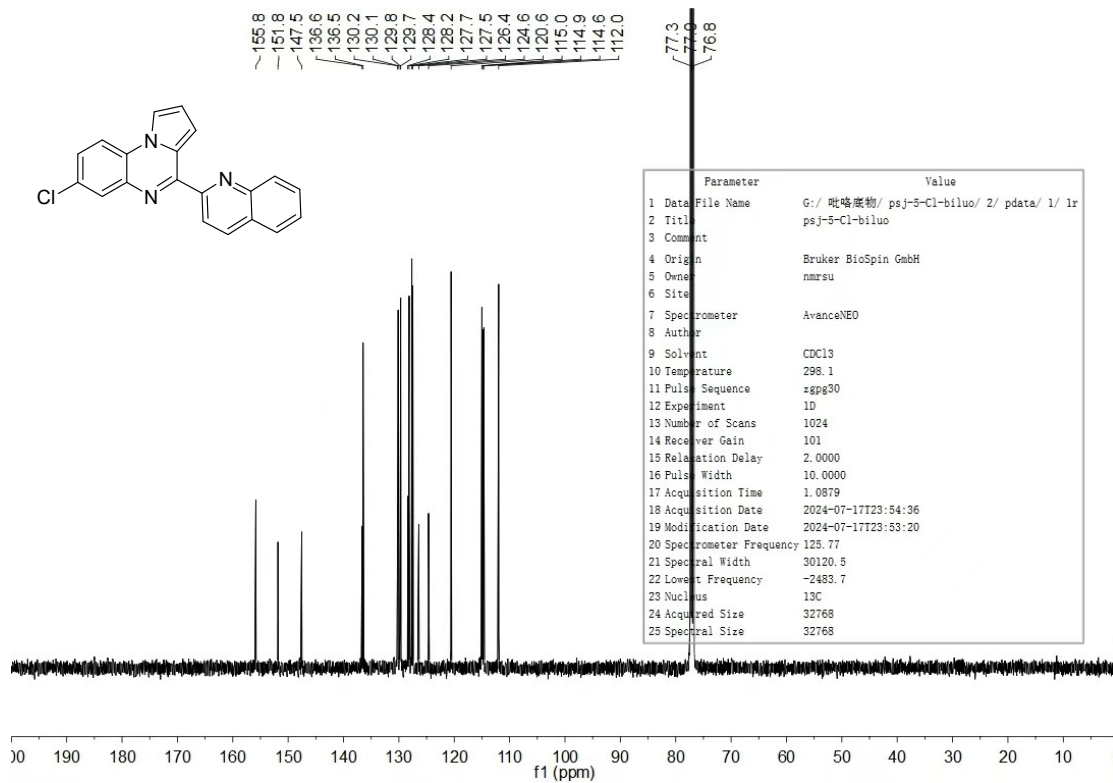

**4-(quinolin-2-yl)-7-(trifluoromethyl)pyrrolo[1,2-a]quinoxaline(3aj)**

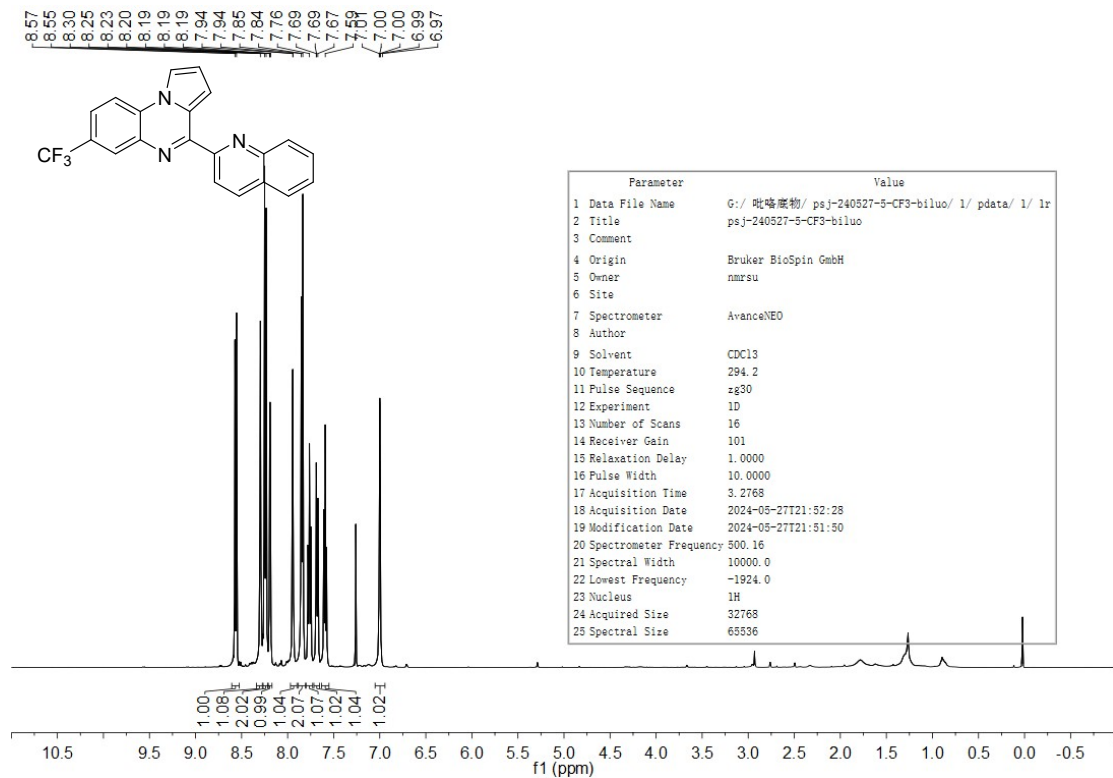

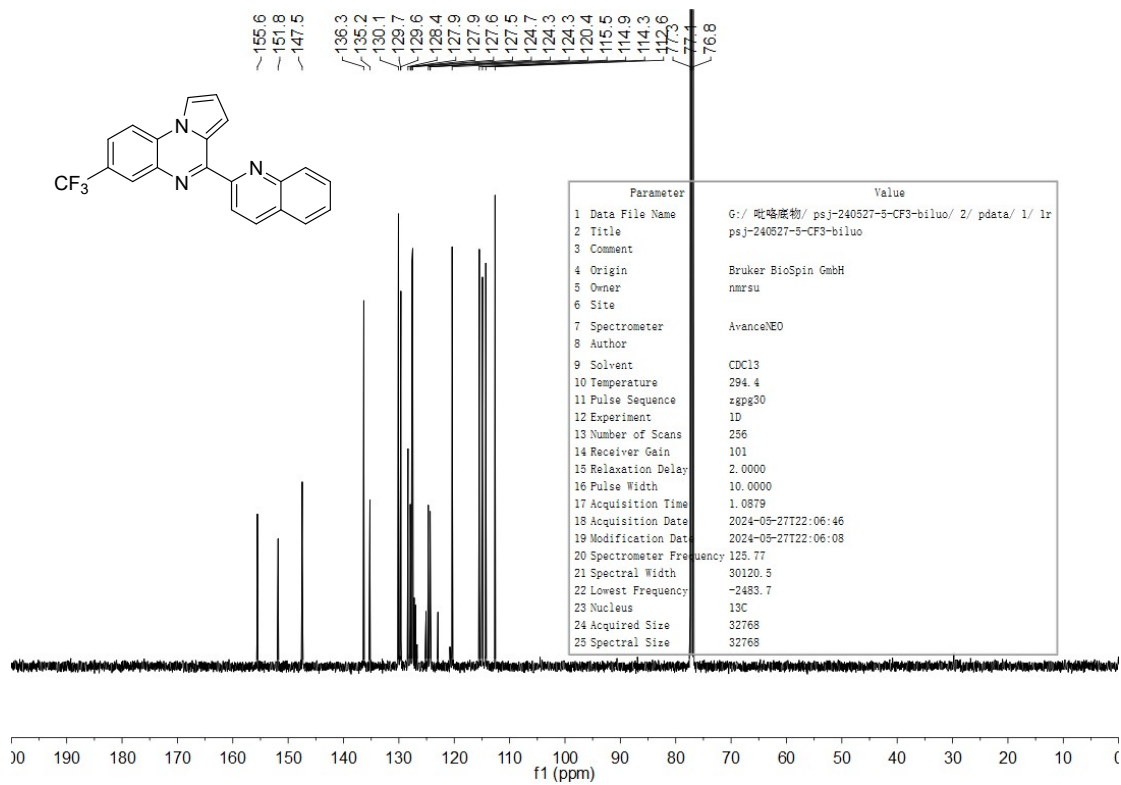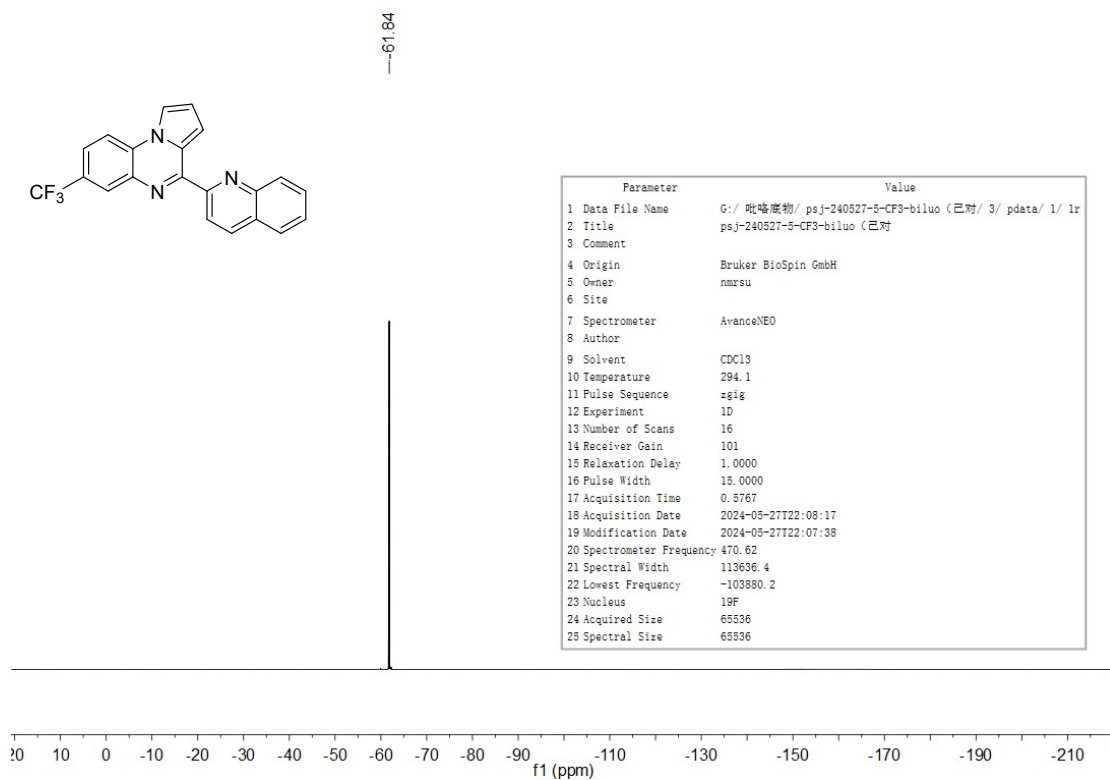



### 6-chloro-4-(quinolin-2-yl)pyrrolo[1,2-a]quinoxaline(3ak)

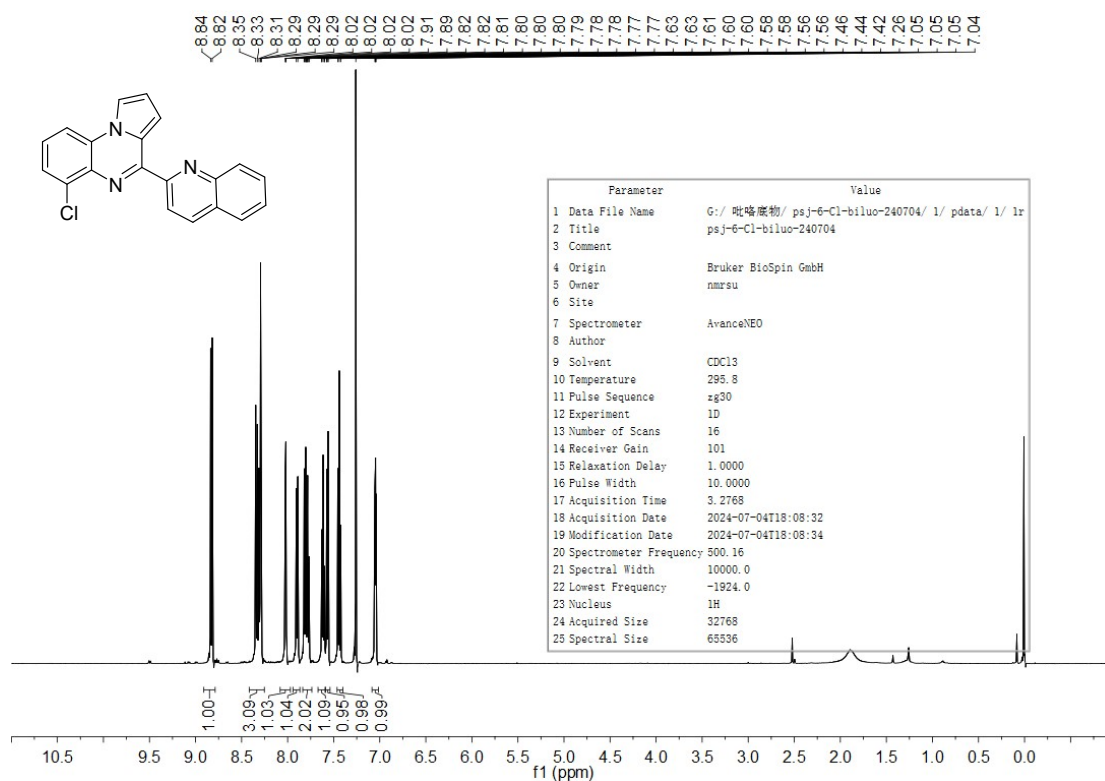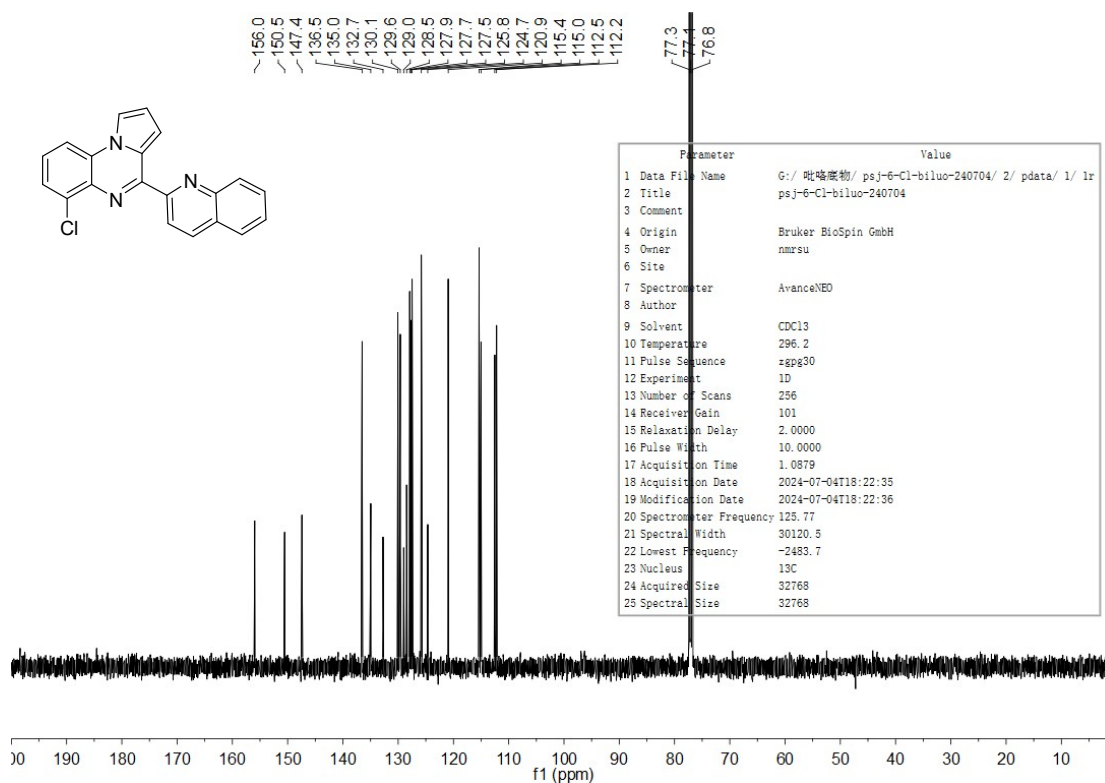

Supplement: d4qo01981d1.pdf [file d4qo01981d1.pdf]
